# Supplementary material
Source: PubMed Central journal article supplement (PMC3084088)
Supplement: 1015254108_Appendix.pdf [file 1015254108_Appendix.pdf]

Supporting Information for  
**Diversity through phosphine catalysis identifies octahydro-1,6-naphthyridin-4-ones as  
activators of endothelium-driven immunity**

*Daniel Cruz<sup>a,1</sup>, Zhiming Wang<sup>b,c,1</sup>, Jon Kibbie<sup>a</sup>, Robert L Modlin<sup>d</sup>, and Ohyun Kwon<sup>b,2</sup>*

<sup>a</sup> Department of Medicine, Division of Cardiology, University of California, Los Angeles, A2-237 Center for Health Sciences, Los Angeles, CA 90095-1679

<sup>b</sup> Department of Chemistry and Biochemistry, University of California, Los Angeles, 607 Charles E. Young Drive East, Los Angeles, CA 90095-1569

<sup>c</sup> Current Address: School of Chemical Engineering, Changzhou University, Changzhou 213164, Jiangsu, People's Republic of China

<sup>d</sup> Department of Medicine, Division of Dermatology, University of California, Los Angeles, 10833 Le Conte Ave, 52-121 CHS Building, Los Angeles, CA 90095

<sup>1</sup> These authors contributed equally.

<sup>2</sup> Corresponding author: University of California, Los Angeles, Department of Chemistry and Biochemistry, 607 Charles E. Young Drive East, Los Angeles, CA 90095-1569. Phone number: (310) 267-4954. Fax number: (310) 206-3722. Email address: [ohyun@chem.ucla.edu](mailto:ohyun@chem.ucla.edu)

## **Contents**

|                                                                                  |    |
|----------------------------------------------------------------------------------|----|
| Supplemental Figures                                                             | 1  |
| Structures of 91 compounds from the phosphine catalysis/Tebbe/Diels–Alder        | 11 |
| Materials and Methodology for Biology                                            | 13 |
| General information for chemical synthesis and compound characterization         | 15 |
| Synthetic procedures and characterization of compounds for solid-phase chemistry | 16 |
| Solution phase medicinal chemistry and characterization of compounds             | 27 |

Supplemental Figures

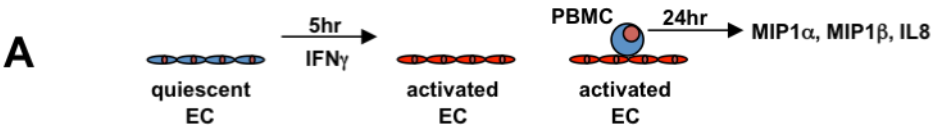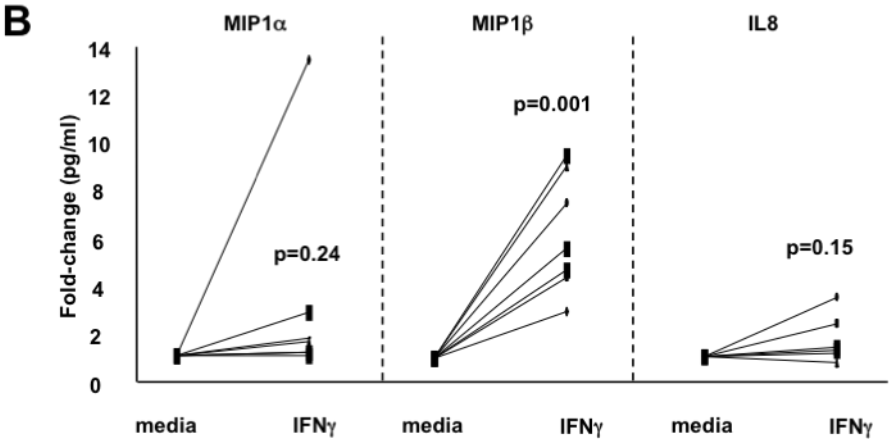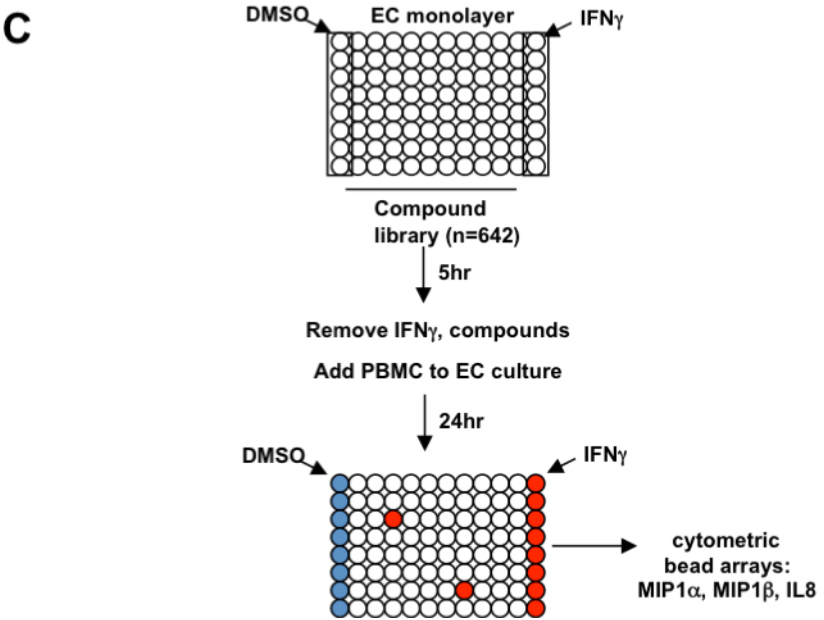

**Supplemental Figure 1:** A biological platform for the detection of activated endothelium. **(A)** Primary endothelial cells were seeded to confluence in a 96 well format and activated by IFN $\gamma$  (10 ng/ml). After 5 hours, IFN $\gamma$  was removed, wells were washed, and then primary human peripheral blood mononuclear cells (PBMC) were added at a ratio of 3:1 (PBMC:EC). 20-24 hours later, supernatants were removed and chemokines were quantified by cytometric bead arrays. **(B)** MIP1 $\beta$  production, but not MIP1 $\alpha$  or IL8 levels, reliably detects endothelium activated by IFN $\gamma$ . Chemokines produced in co-culture conditions with quiescent vs. activated EC; data represent the results from n=7 (MIP1 $\alpha$  and MIP1 $\beta$ ) and n=6 (IL8) independent experiments. **(C)** Chemical library screen for compounds that activate human endothelium. A 642 compound library was added following the same method as in A and B. Controls included DMSO and IFN $\gamma$  on each plate. Supernatants were measured for chemokines by cytometric bead arrays.

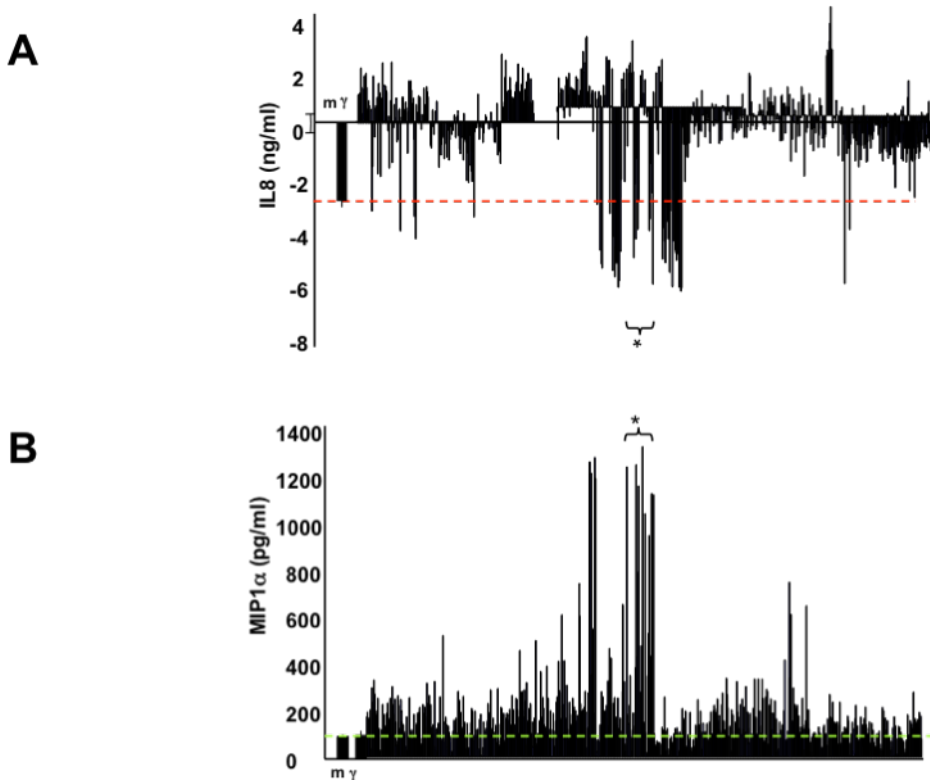

**Supplemental Figure 2:** Identification of small molecules that activate human endothelial cells. IFN $\gamma$  (10 ng/ml) and DMSO controls (n=60 total replicates) and 642 compounds (10 $\mu$ M) were tested for their ability to promote (A) IL8 and (B) MIP1 $\alpha$  production. For IL8, data is expressed as change in expression in comparison to DMSO. Red dashed line represents the level for IFN $\gamma$ -treated EC-PBMC co-culture. For MIP1 $\alpha$ , DMSO and IFN $\gamma$ -treated EC triggered comparable levels.

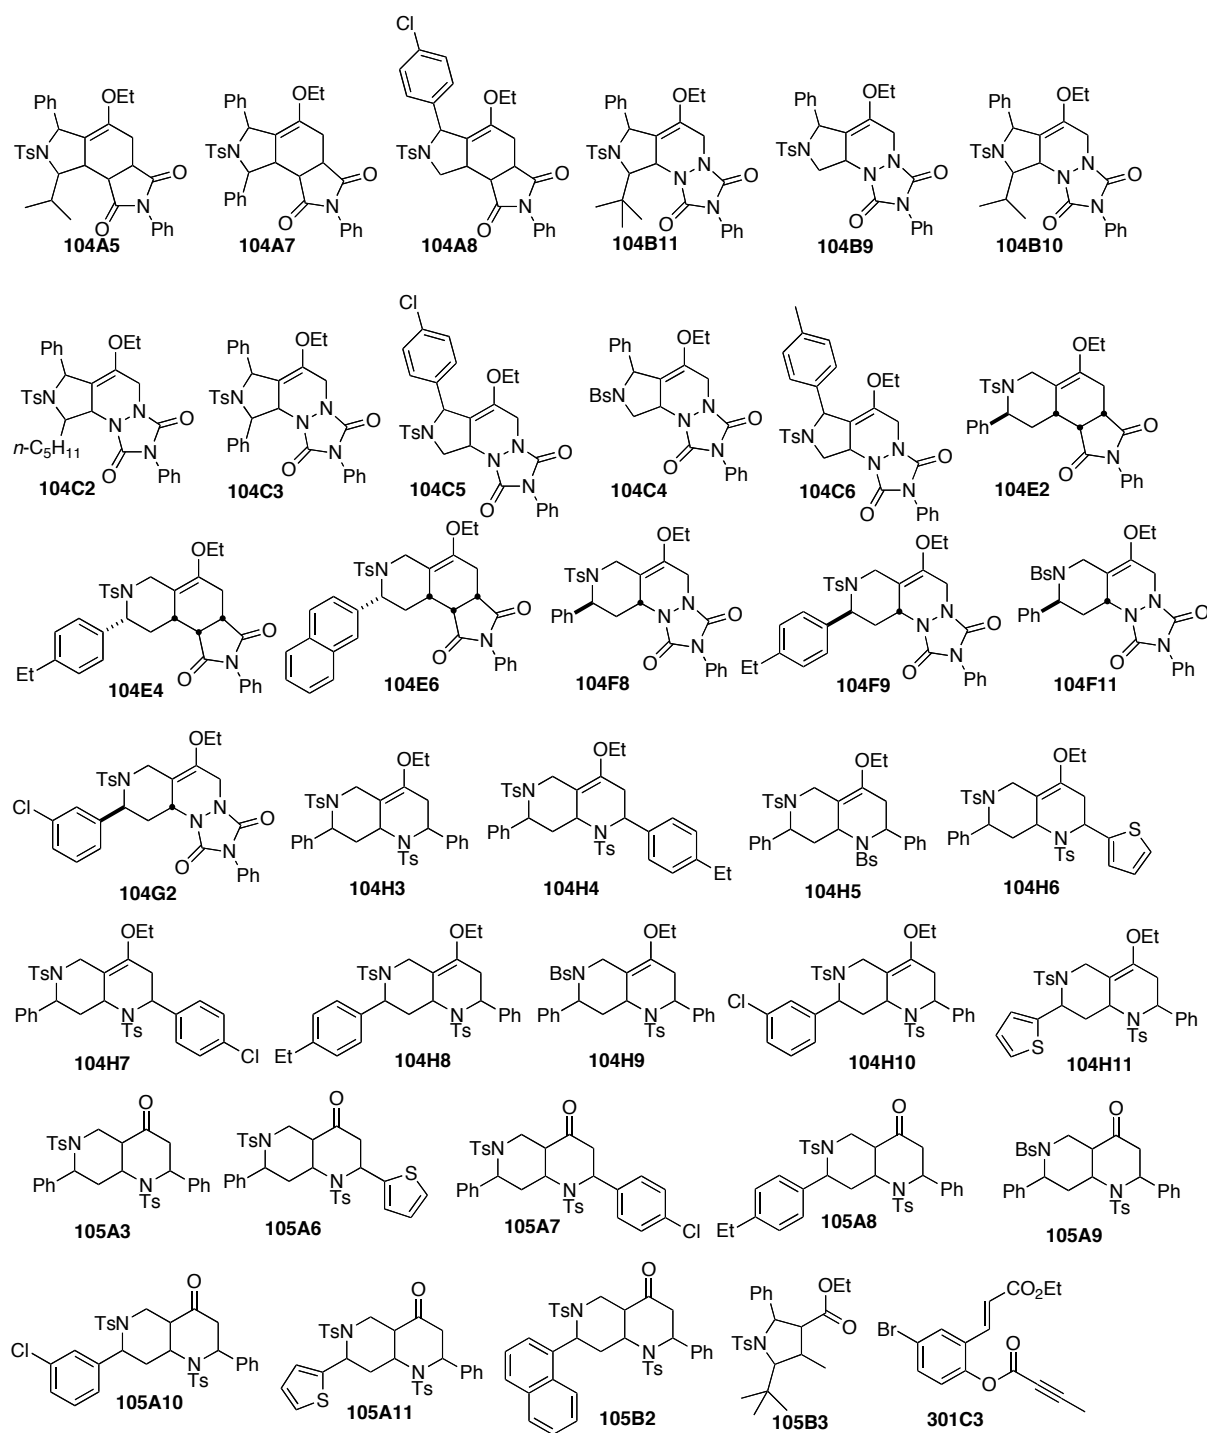

**Supplemental Figure 3:** Structure of 37 hits (out of 642 compounds) and their IDs (e.g., 104A5). Structure of 91 compounds (104A2–105B2) in the 642 compound library that are derived from the sequence of reactions, phosphine catalysis, Tebbe methylenation, Diels–Alder reaction, and sometime hydrolysis, are provided on pages 11–13.

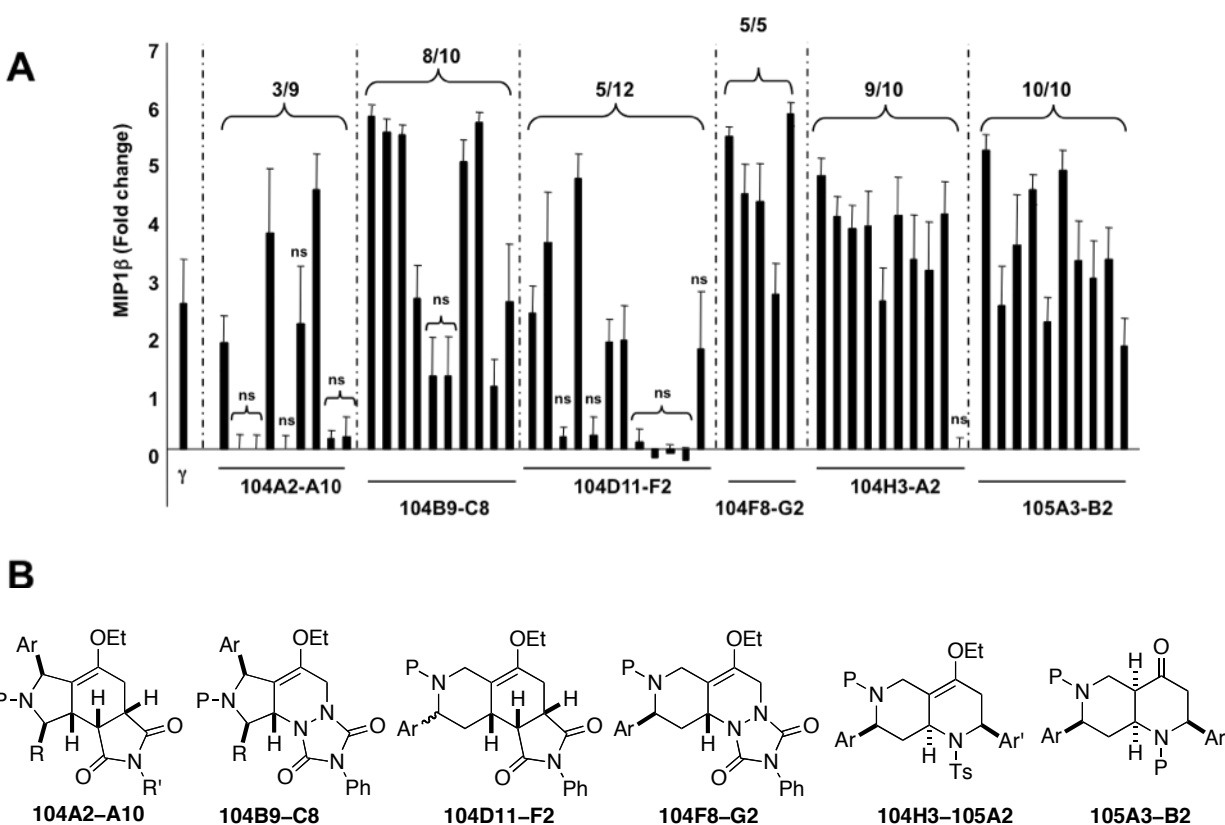

Ar = phenyl, 4-MeC<sub>6</sub>H<sub>4</sub>, 4-EtC<sub>6</sub>H<sub>4</sub>, 4-ClC<sub>6</sub>H<sub>4</sub>, 3-ClC<sub>6</sub>H<sub>4</sub>, 2-thiophenyl, 1-naphthyl

P = tosyl, benzenesulfonyl

R = H, isopropyl, *n*-pentyl, *t*-butyl, phenyl

R' = phenyl, ethyl, benzyl

Ar' = phenyl, 4-EtC<sub>6</sub>H<sub>4</sub>, 4-ClC<sub>6</sub>H<sub>4</sub>, 2-thiophenyl

**Supplemental Figure 4:** Validation of the seven scaffolds accounting for the majority of EC activating compounds. **(A)** After the initial screen, the six subfamilies (hits and non-hits) were repeated in two independent experiments. Data represents mean  $\pm$  s.e.m. for MIP1 $\beta$  fold-induction over DMSO control for all three experiments. To account for experimental variability, all individual data points were log base 2 transformed. Number of family members which were significantly induced over DMSO ( $p < 0.05$ ) is shown above each family of compounds. **(B)** The general structures of the seven families of EC-activating compounds.

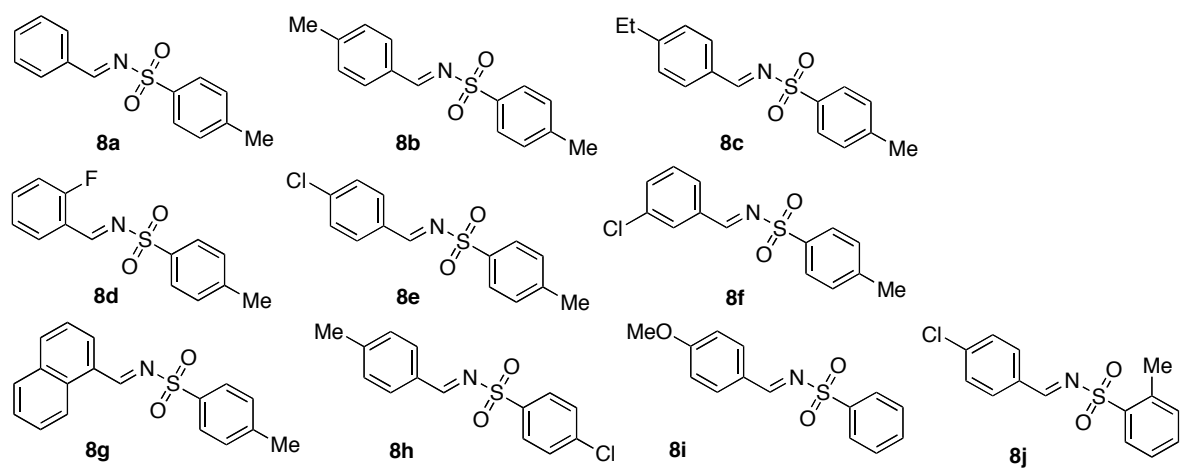

**Supplemental Figure 5:** Ten *N*-sulfonylimine building blocks for the solid-phase octahydro-1,6-naphthyridin-4-one library.

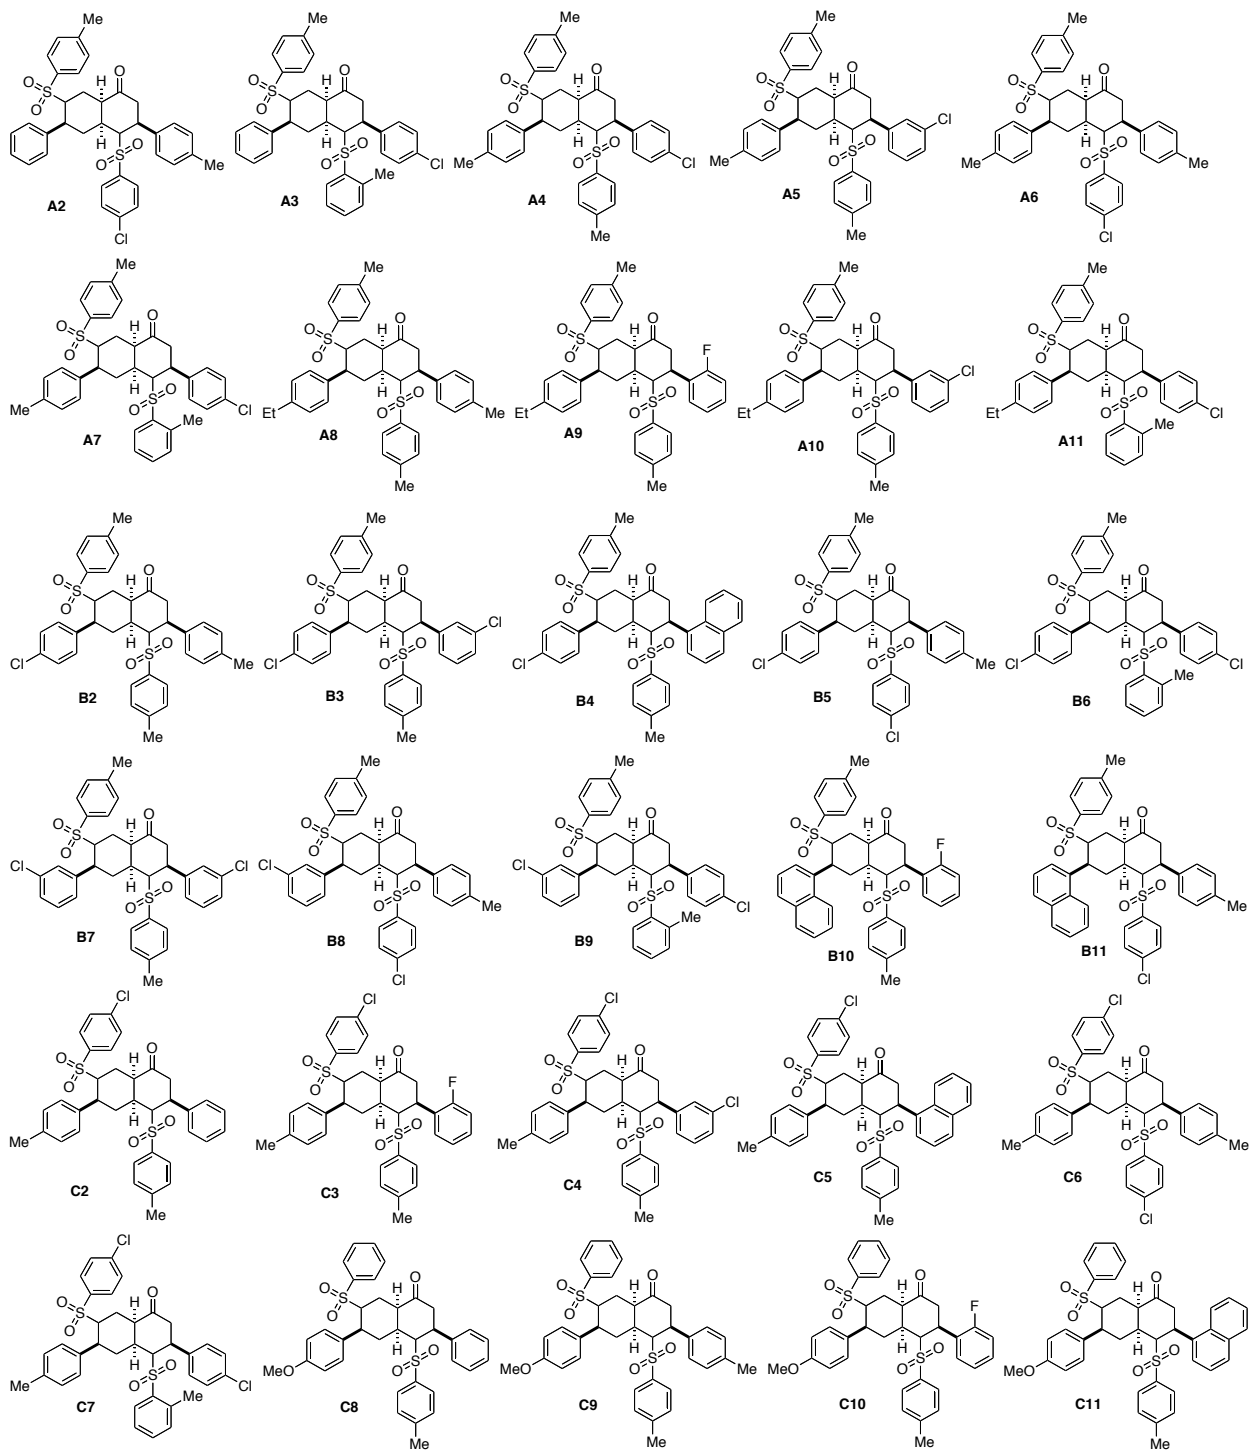



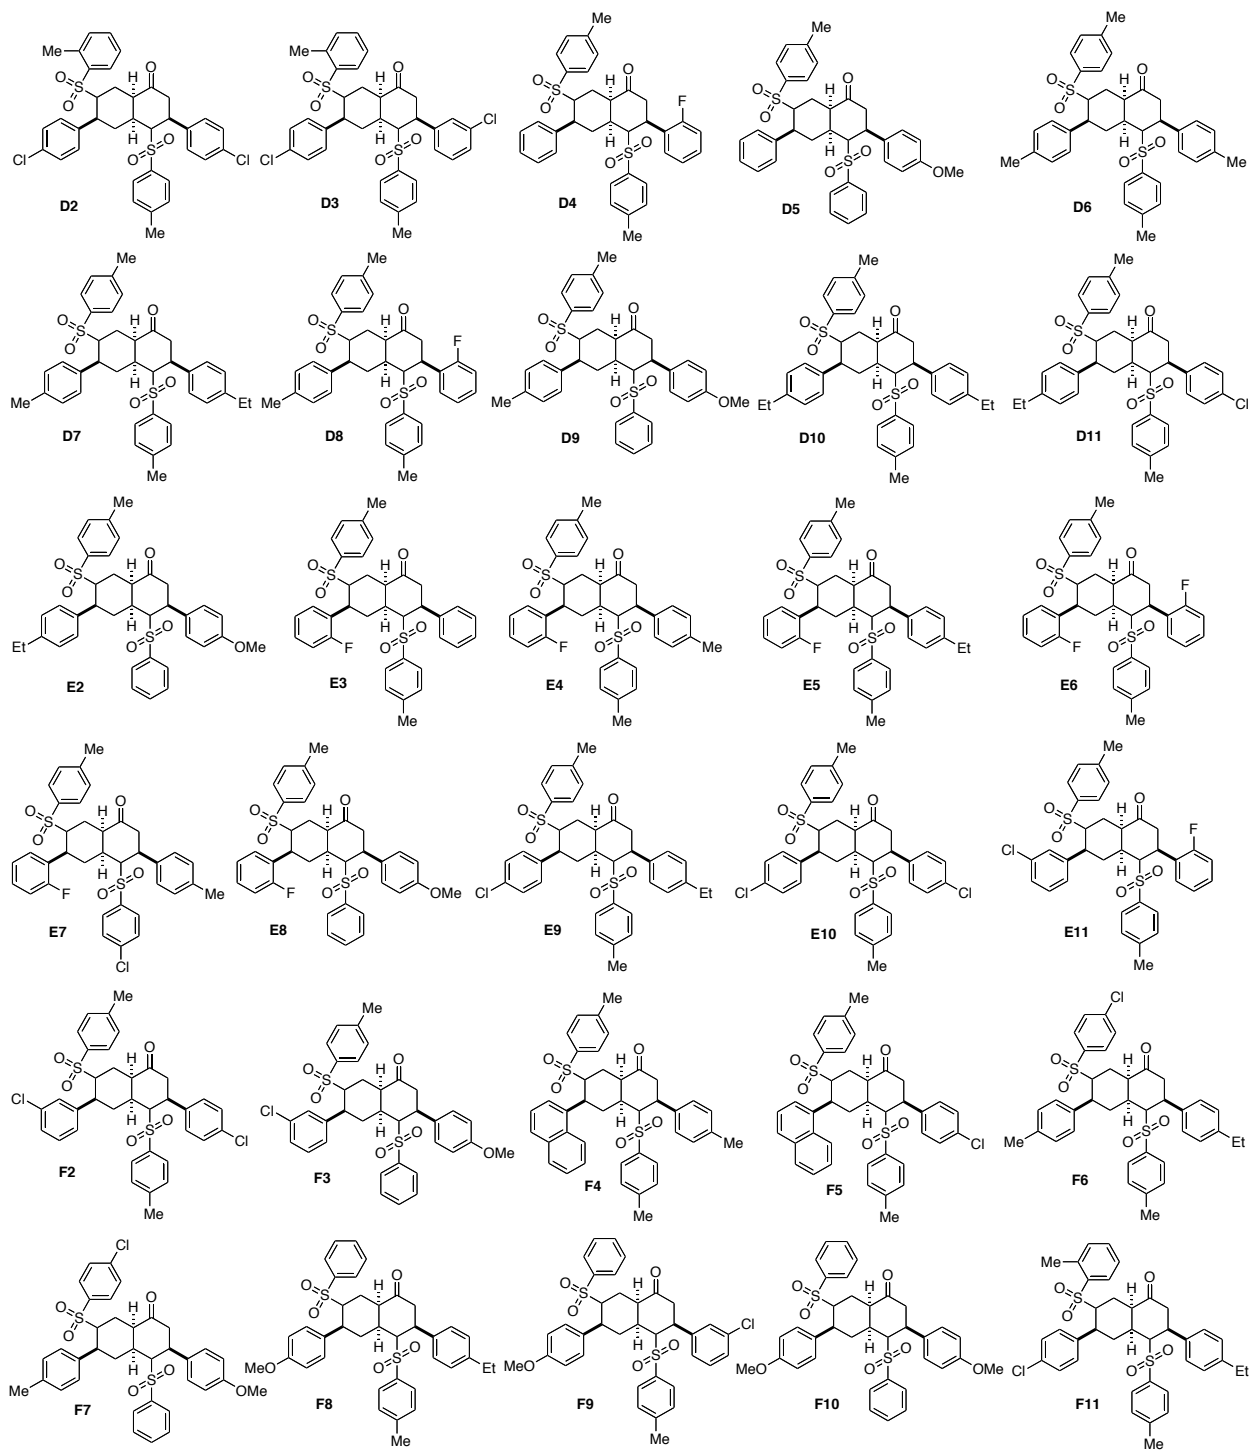

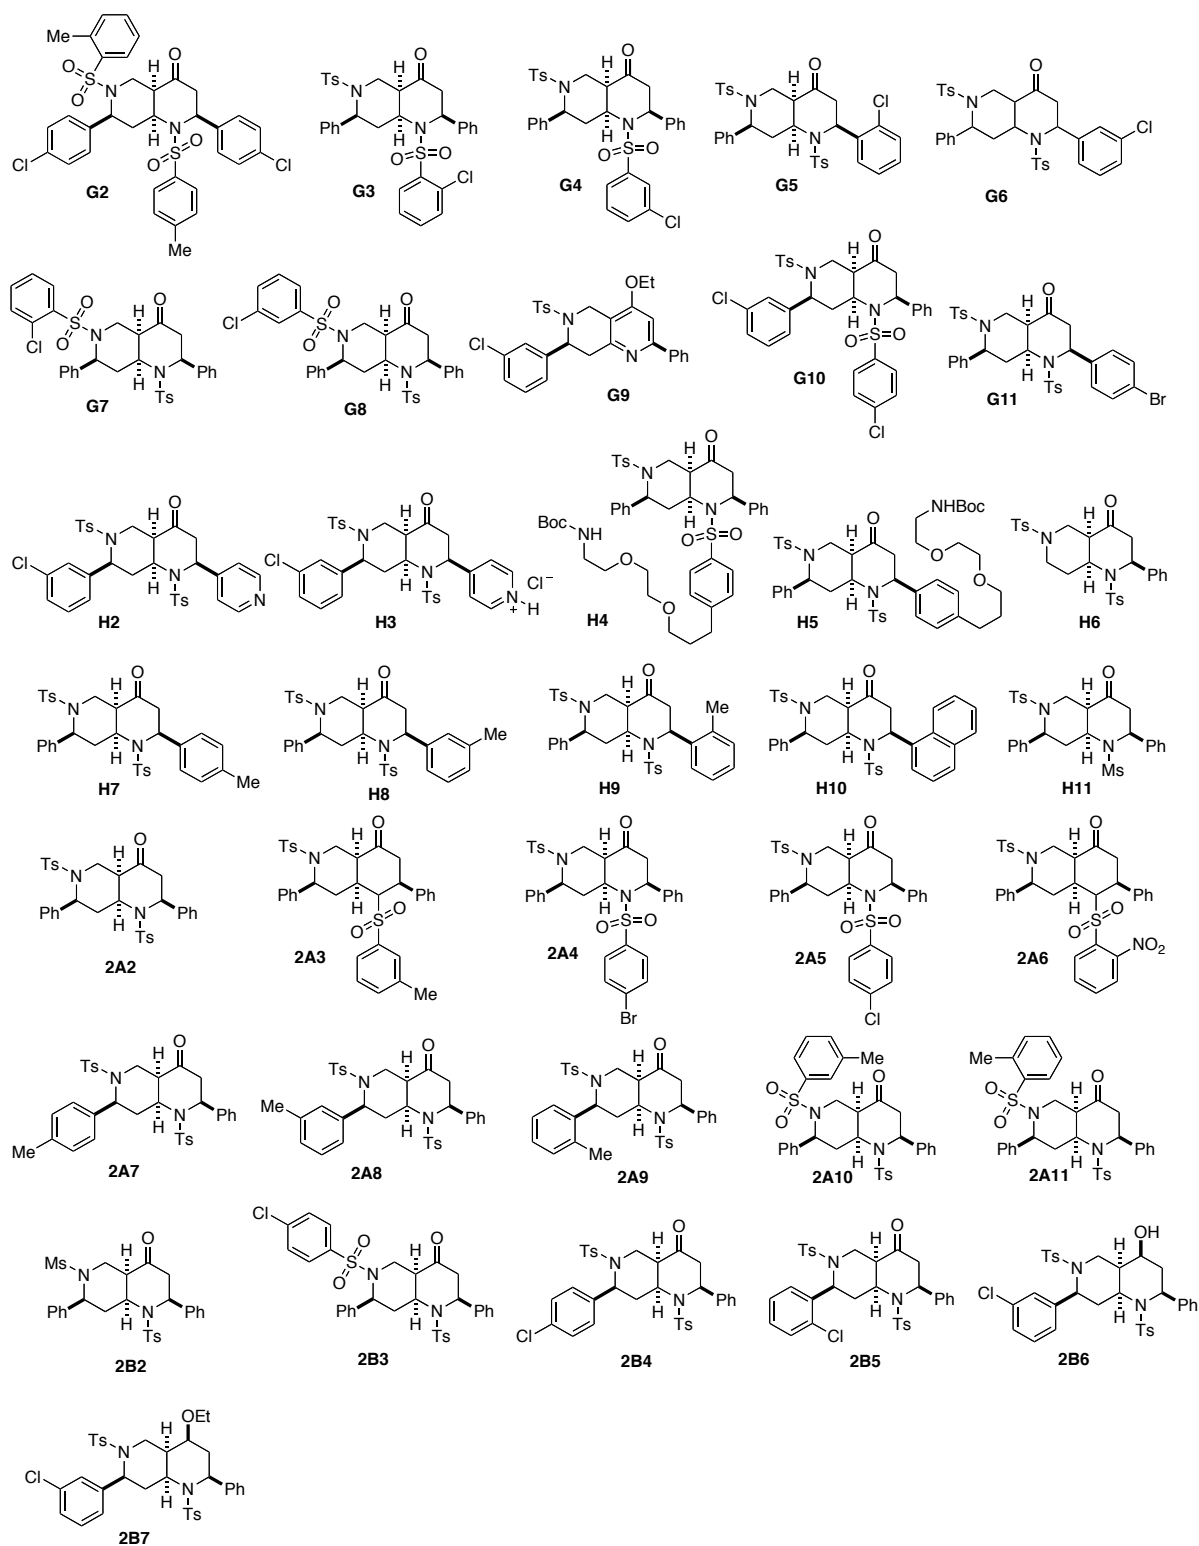

**Supplemental Figure 6:** Structure of 96 naphthyridinone analogs and their IDs (A02–2B07).

## Structures of 91 compounds from the phosphine catalysis/Tebbe/Diels–Alder(/hydrolysis)

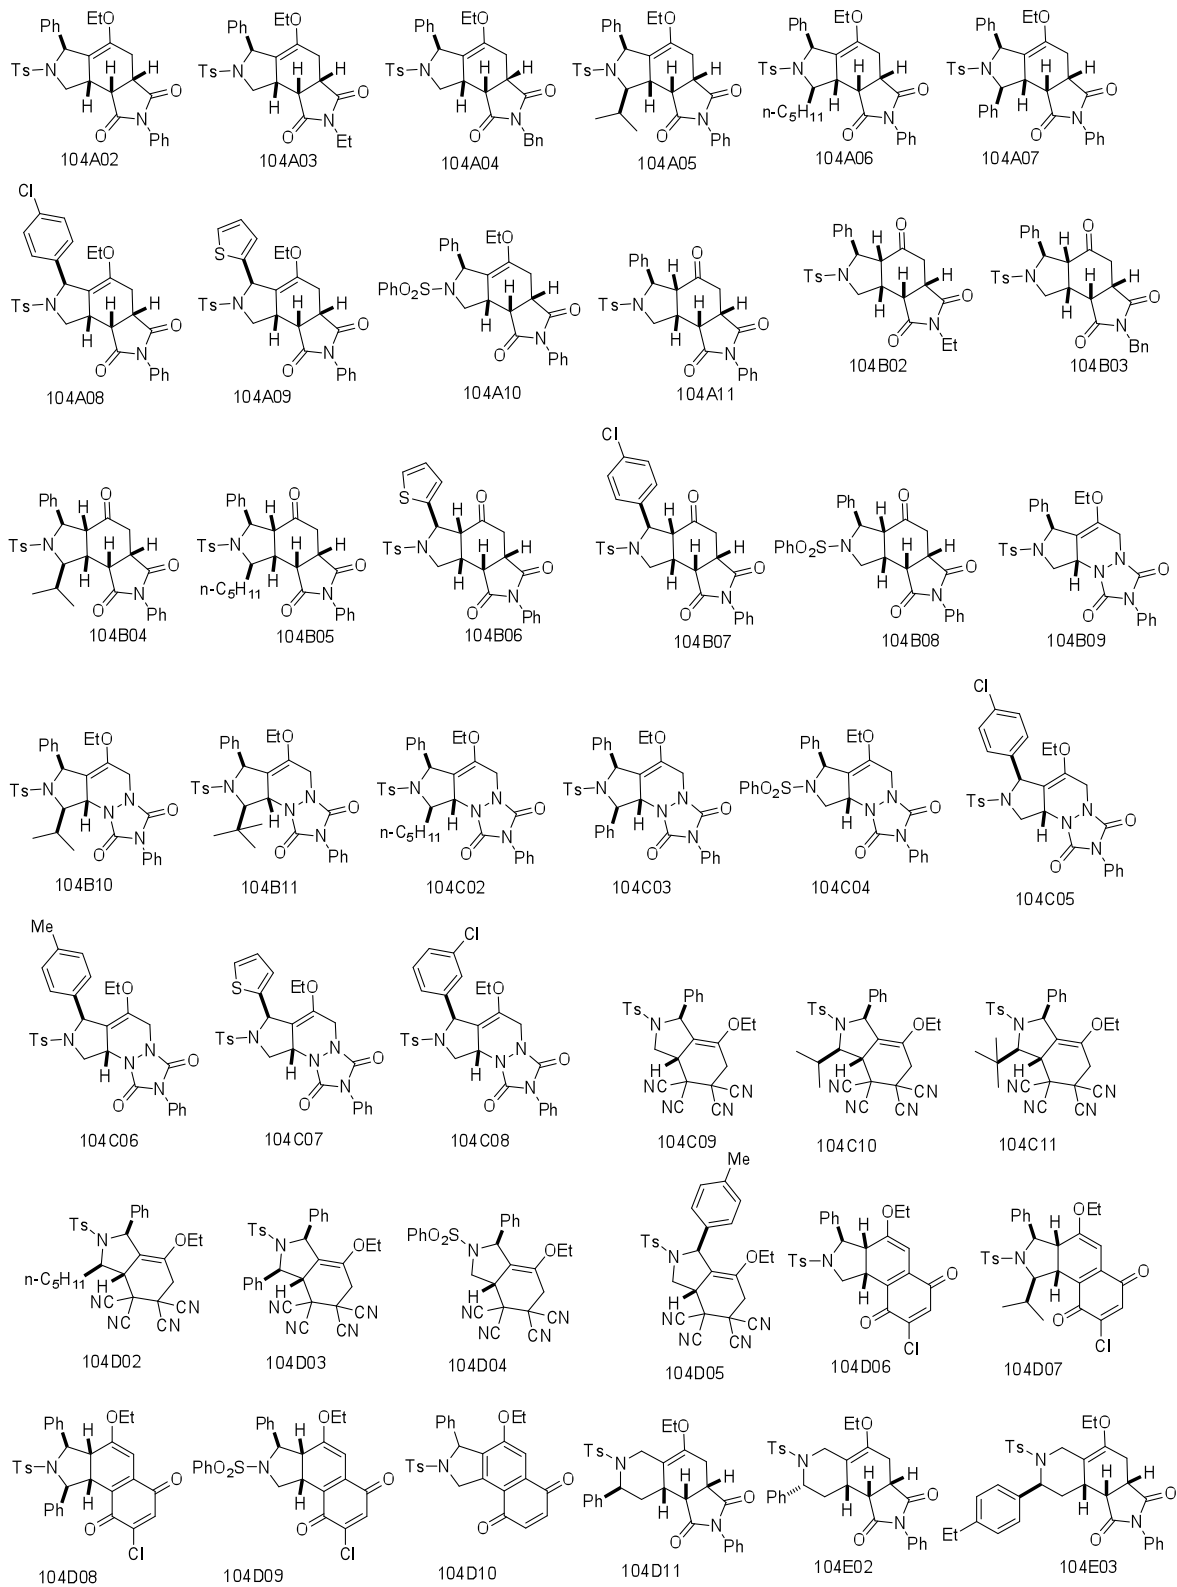

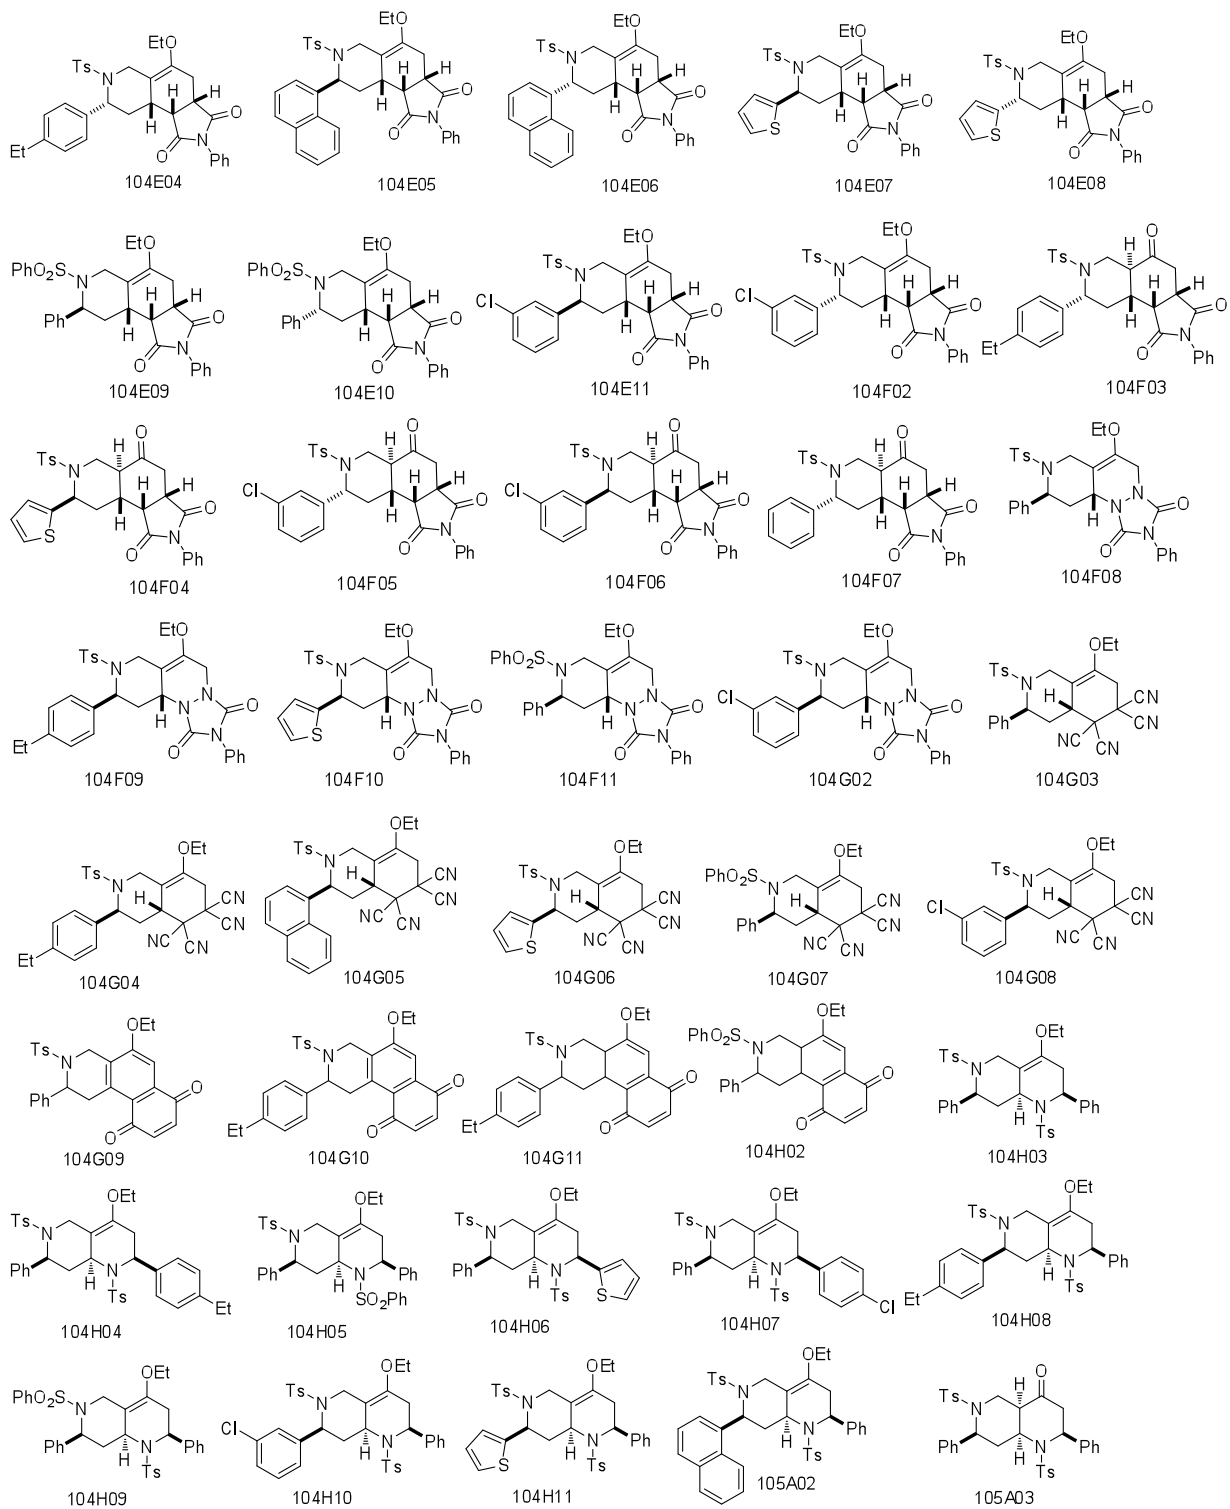

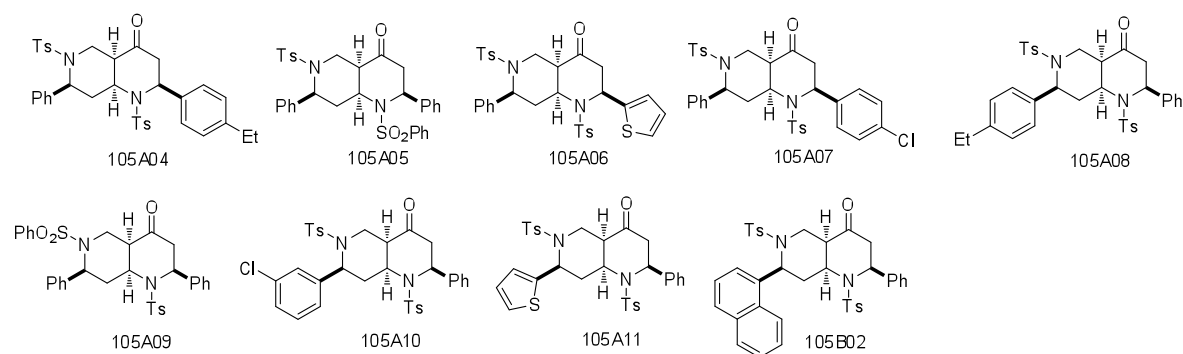

## Materials and methods for biology

**Cells and reagents:** Human umbilical endothelial cells (HUVEC) were purchased from (Lonza) and were used between passage 5 and 8. Peripheral blood mononuclear cells were isolated from healthy donors (UCLA Institutional Review Board # 92-10-591-31) using Hypaque Ficoll (GE Healthcare). IFN $\gamma$  (Peprotech) was used at 10 ng/ml in all experiments. Antibodies used: ICAM1 (Abd Serotec), E-selectin (R&D systems), CD14 (Becton Dickinson) and MIP1 $\beta$  (Becton Dickinson). Cytokine bead arrays for IL8, MIP1 $\alpha$ , and MIP1 $\beta$  were obtained from (Becton Dickinson).

**Co-culture assays:** HUVEC were grown to 80-90% confluency in T150 flasks (Corning). On the day of experiments, HUVEC were harvested and plated at a confluent density in 96 well plates; these were either half or full volume plates, requiring  $2.5-5 \times 10^4$  EC per well, respectively, in complete EBM-2 media (Lonza). After adherence for 2-3 hours, IFN $\gamma$  (10ng/ml), DMSO, or compound library (final concentration, 10 mM) was added in incomplete EBM-2 media (Lonza). After 5 hours, stimuli were removed and cells were gently washed twice with RPMI (Invitrogen), followed by addition of  $7.5-10 \times 10^4$  human PBMC in 10% FCS. For cytokine analysis, 50 ml was removed at 24 hours for CBA analysis. The biological effects observed were not attributable to either LPS contamination, nor to cellular toxicity, as determined by flow cytometric analysis and 3-(4,5-dimethylthiazol-2-yl)-2,5-diphenyl tetrazolium bromide (MTT) assay.

**Cytometric Bead Arrays (CBA):** 50 ml of supernatant from EC alone, PBMC alone, or co-culture conditions was collected for CBA analysis for IL8, MIP1 $\alpha$ , and MIP1 $\beta$ . CBA was performed as per the manufacturer's recommendations (Becton Dickinson). Standard curves and

all samples were acquired on a FacsCalibur flow cytometer and data was analyzed using FloJo software.

**Flow cytometry:** HUVEC were stimulated with IFN $\gamma$ , DMSO, or compounds of interest (10  $\mu$ M) for 5 hours. Stimuli were removed and cells were gently washed and media was replaced with 10% FCS for 24 hours. Cells were stained with anti-ICAM1 and anti-E-selectin, or appropriate isotype antibodies. For intracellular chemokine staining, stimulations of HUVEC were carried out as mentioned above with IFN $\gamma$ , DMSO and compound of interest. After 8 hours of PBMC and HUVEC co-culture incubation, Golgi Plug(Becton Dickinson) was added to the culture and incubation carried out for an additional 16 hours. After the incubation cells were fixed, permeabilized and stained with anti-CD14 and anti-MIP1b or appropriate isotype controls. Samples were then analyzed with a FacsCalibur flow cytometer and subsequent data analysis was performed using FloJo software.

**Microarrays:** HUVEC were grown as described above, and then plated at  $1 \times 10^6$  in 6 well plates in complete EBM-2. Triplicate wells were treated with DMSO, active analogue (D10) and inactive analogue (E2)- all at equal volumes and concentration a final concentration of 10  $\mu$ M in incomplete EBM-2. After 5 hours, media was removed and RNA was extracted using Trizol (Invitrogen), followed by RNeasy Minelut Cleanup Kit (Qiagen). RNA was taken to the UCLA Microarray Core Center where it was processed using the Human Genome Affymetrix U133 Plus 2.0 Array. Microarray data was analyzed using dChip software (version 11/18/07) from the Cheng Li Lab at <http://biosun1.harvard.edu/complab/dchip>. For statistical analysis using dChip software, only gene probes that were minimally present in two of the three replicates were used, and parameters for significance were set at fold change >1.25, p-value <0.05. Total number of probes present for active analogue (D10): 30,228. Total number of probes present for inactive analogue (E2): 30,000. Unsupervised dendrograms were created using dChip software (Fig. 5D). Genes with known function in immune regulation were selected based on published databases and gene functions identified by Gene Ontology or OMIM; dendrogram was created using dChip software (Fig. 5E).

**Statistical analysis:** Experimental results were compared using student t-tests; results were considered significant if *p*-value was <0.05. Canonical network analysis for all expressed probes

in D10 and E2 datasets was performed by using Ingenuity Pathway Analysis software (version 6.0; Ingenuity Systems).

### **General information for chemical synthesis and compound characterization**

All reactions were performed under Ar atmospheres in oven-dried glassware with dry solvents and anhydrous conditions. Unless otherwise stated, all reagents were purchased from commercial suppliers and used without further purification. Toluene, dichloromethane (DCM), and methanol were freshly distilled from CaH<sub>2</sub>. THF was distilled from sodium benzophenone ketyl prior to use. Organic solutions were concentrated under reduced pressure on a rotary evaporator or an oil pump. Synphase lanterns (A-series lantern; capacity: 75 μmol/lantern), spindles, and cogs were purchased from Mimotopes Pty. Ltd., Clayton, Australia. Prior to their first use, the lanterns were washed (3×) with the reaction solvent. Each washing was left to settle for at least 5 min, unless otherwise stated. The solid phase washings were performed using PA-grade solvents. Tebbe reagent (ca. 1.0 M in toluene) was synthesized according to the procedure reported by Grubbs.<sup>1</sup> Reactions were monitored using thin layer chromatography (TLC) on silica gel–precoated glass plates (0.25 mm thickness, SiliCycle silica gel). Chromatograms were visualized through fluorescence quenching with UV light at 254 nm. Flash column chromatography was performed using SiliCycle Silica-P Flash silica gel (60 Å pore size, 40–63 μm). Infrared spectra were recorded using a Perkin–Elmer Spectrum One FT-IR spectrometer. <sup>1</sup>H and <sup>13</sup>C NMR spectra were recorded in CDCl<sub>3</sub> on Bruker Avance 500, ARX-500, or ARX-400 spectrometers, as indicated. Chemical shifts (δ ppm) are provided relative to tetramethylsilane (TMS), with the resonance of the undeuterated solvent or TMS as the internal standard. <sup>1</sup>H NMR spectral data are reported as follows: chemical shift, multiplicity (s = singlet; d = doublet; t = triplet; q = quartet; m = multiplet), coupling constant(s) (Hz), integration. <sup>13</sup>C NMR spectral data are reported in terms of chemical shift. MALDI mass spectra were obtained using an AB/PerSpective DE-STR TOF instrument, with samples dissolved in CH<sub>3</sub>CN and using 2,5-dihydroxybenzoic acid or 1,8,9-anthracenetriol as the matrix. X-ray crystallographic data were collected using a Bruker SMART CCD-based diffractometer equipped with a low-temperature apparatus operated at 100 K. LCMS data were obtained on an Agilent 1200 HPLC using a Acquity BEH C-18, Acquity

---

<sup>1</sup> L. F. Cannizzo, R. H. Grubbs, *J. Org. Chem.* **1985**, *50*, 2386.

BEH Phenyl, Acquity BEH Shield C-18, or Acquity BEH HILIC 2.1x50mm column, an Agilent 6224 TOF mass spectrometer in Waters ZQ Quadrupole /ESCI mode, and water/acetonitrile, water/methanol, methanol/THF as the eluent.

## Synthetic procedures and characterization of compounds for solid-phase chemistry

### Synthesis of building blocks 2-methyl-2,3-butadienoic acid (**2**) and *N*-sulfonylimines (**8**)

2-methyl-2,3-butadienoic acid (**2**) was synthesized following a literature procedure.<sup>2</sup> All *N*-sulfonylimines (**8**) were synthesized through the condensation of the corresponding aldehydes with the sulfonamides catalyzed by  $\text{BF}_3/\text{OEt}_2$  with azeotropic water removal (Dean–Stark), according to the literature procedure.<sup>3</sup>

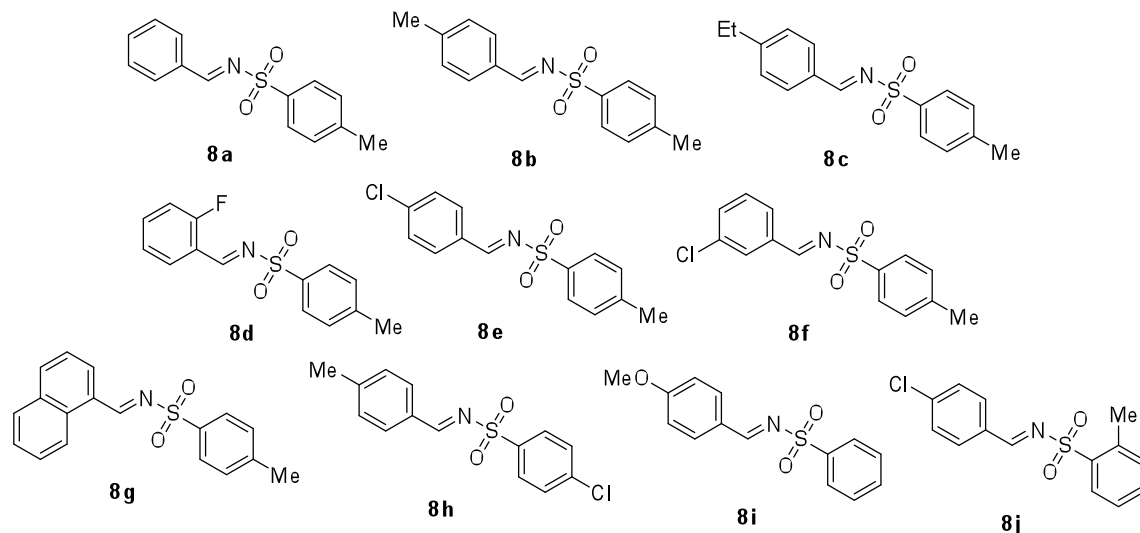

### Tagging of the building Blocks

The individual lanterns were tagged with colored spindles and cogs to encode the building blocks used for each lantern. The colors of the spindles and cogs used to encode the imine building blocks of [4 + 2] annulation or Tebbe reaction were summarized and showed below. Because the Diels-Alder reaction was the last step of the synthesis, tagging for the imine building blocks of Diels-Alder reaction was not necessary.

<sup>2</sup> Harvey, G. R.; Ratts, K. W. *J. Org. Chem.* **1966**, *31*, 3907.

<sup>3</sup> McKay, W. R.; Proctor, G. R. *J. Chem. Soc., Perkin Trans. 1* **1981**, 2435.



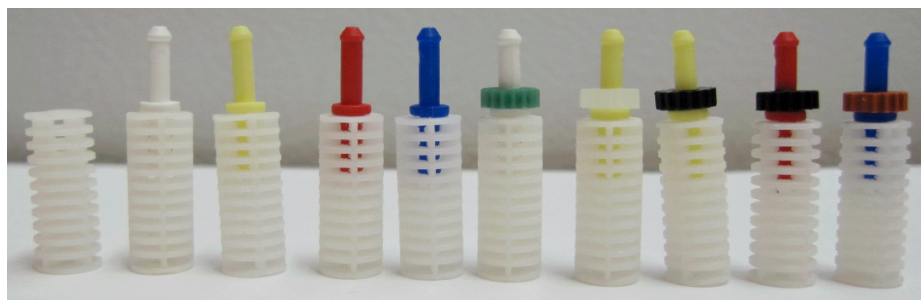

| entry | <i>N</i> -sulfonylimine | spindle | cog     |
|-------|-------------------------|---------|---------|
| 1     | <b>8a</b>               | none    | none    |
| 2     | <b>8b</b>               | white   | none    |
| 3     | <b>8c</b>               | yellow  | none    |
| 4     | <b>8d</b>               | red     | none    |
| 5     | <b>8e</b>               | blue    | none    |
| 6     | <b>8f</b>               | white   | green   |
| 7     | <b>8g</b>               | yellow  | natural |
| 8     | <b>8h</b>               | yellow  | black   |
| 9     | <b>8i</b>               | red     | black   |
| 10    | <b>8j</b>               | blue    | brown   |

### Resin loading with 2-methyl-2,3-butadienoic acid (**2**) and solid phase [4+2] annulations with *N*-sulfonylimines (**8**)

The resin loading with 2-methyl-2,3-butadienoic acid (**2**) and solid phase [4 + 2] annulations with *N*-sulfonylimines (**8**) were finished following the procedures reported previously from our group.<sup>4</sup> Longer reaction times were needed because A-series lantern (capacity: 75  $\mu\text{mol}/\text{lantern}$ ) was used instead of L-series lantern (capacity: 15  $\mu\text{mol}/\text{lantern}$ ).

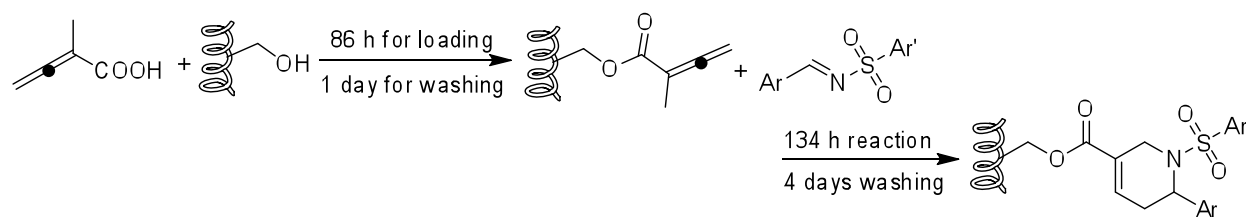

<sup>4</sup> Fiji, H. D. G.; Kinderman, S. S.; Watanabe, M.; de Leon, P.; Tamanoi, F.; Kwon, O. *J. Am. Chem. Soc.* **2007**, *129*, 5843.

## Solid Phase Tebbe reaction of the lantern-bound $\alpha,\beta$ -unsaturated esters

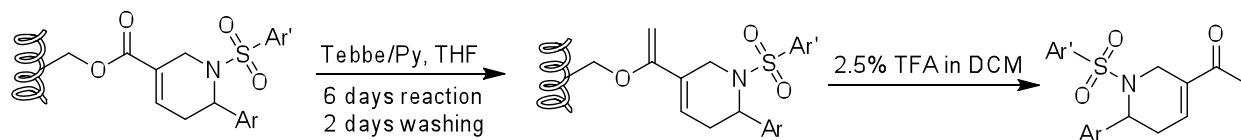

The lantern-bound  $\alpha,\beta$ -unsaturated esters were placed in oven-dried 250 mL flasks and charged with Ar. The lanterns were washed two times with freshly distilled DCM, five times with freshly distilled THF, and then soaked in freshly distilled THF (3 mL/lantern). The anhydrous pyridine (1.3 eq.) and 1.0 M Tebbe reagent in toluene (13.3 eq.) were added at room temperature. After 2 days, another 13.3 eq. Tebbe reagent was added. After another 4 days, the reaction was complete. The lanterns were washed as follows: THF ( $5 \times 40$  mL), 40 mL THF + 2 mL 15% NaOH for 15 h, 50% H<sub>2</sub>O in THF ( $3 \times 40$  mL), THF ( $3 \times 40$  mL), 50 mL THF overnight, THF ( $2 \times 40$  mL), DCM ( $3 \times 40$  mL). (Note: Lanterns were soaked for at least 15 min before changing the solvents. Before the reaction setting, two times with freshly distilled DCM (at least 50 mL DCM for 22 lanterns is required) and five times with freshly distilled THF (at least 50 mL DCM for 22 lanterns is required) are very important for the reaction yield. Otherwise the reaction yield will be very low.) The Tebbe products were cleaved by treatment with TFA/DCM 2.5% (7 mL /lantern) to yield the crude  $\alpha,\beta$ -unsaturated ketone products.

The spectroscopic data of the representative  $\alpha,\beta$ -unsaturated ketone products are listed below.

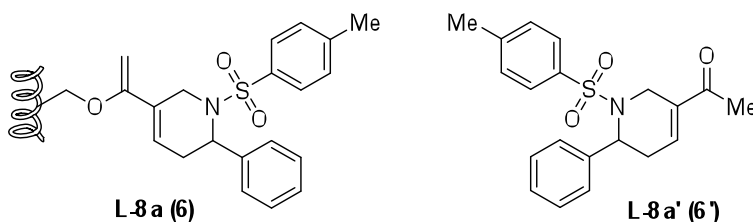

The lantern **L-8a (6)** was treated with 2.5% TFA in DCM (7 mL) to yield a crude product, which was purified by flash column chromatography on the silica gel using 20% ethyl acetate in hexanes to afford compound **L-8a' (6')** as yellow solid in 53% yield, over 4 steps; IR (film)  $\nu_{\max}$  3062, 2920, 1666, 1160  $\text{cm}^{-1}$ ; <sup>1</sup>H NMR (500 MHz, CDCl<sub>3</sub>):  $\delta$  7.64 (d,  $J = 8.2$  Hz, 2H), 7.27-7.19 (m, 7H), 6.92 (br, 1H), 5.38 (d,  $J = 5.4$  Hz, 1H), 4.46 (d,  $J = 18.4$  Hz, 1H), 3.38 (ddd,  $J$

= 18.4, 5.6, 3.3 Hz, 1H), 2.70-2.67 (m, 2H), 2.38 (s, 3H), 2.22 (s, 3H);  $^{13}\text{C}$  NMR (125 MHz,  $\text{CDCl}_3$ ):  $\delta$  196.4, 143.3, 138.2, 137.1, 136.9, 136.2, 129.5, 128.5, 127.7, 127.0, 126.9, 52.1, 38.9, 27.6, 24.9, 21.4; HRMS ( $m/z$ ):  $[\text{M}+\text{H}]^+$  calcd. for  $\text{C}_{20}\text{H}_{21}\text{NO}_3\text{SH}$ , 356.1315; found, 356.1299.

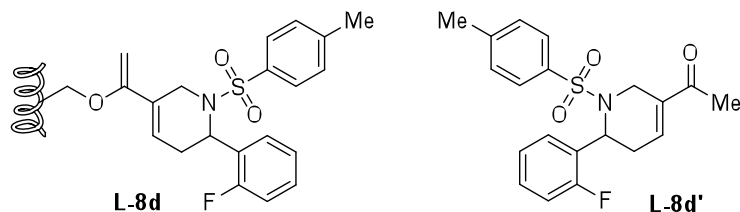

The lantern **L-8d** was treated with 2.5% TFA in DCM (7 mL) to yield a crude product, which was purified by flash column chromatography on the silica gel using 20% ethyl acetate in hexanes to afford compound **L-8d'** as yellow solid in 39% yield, over 4 steps; IR (film)  $\nu_{\text{max}}$  3064, 2917, 1667, 1162  $\text{cm}^{-1}$ ;  $^1\text{H}$  NMR (400 MHz,  $\text{CDCl}_3$ ):  $\delta$  7.64 (d,  $J = 8.3$  Hz, 2H), 7.24-7.17 (m, 3H), 7.02-6.92 (m, 4H), 5.72 (d,  $J = 7.2$  Hz, 1H), 4.42 (d,  $J = 18.3$  Hz, 1H), 3.59-3.52 (m, 1H), 2.93-2.84 (m, 1H), 2.64-2.57 (m, 1H), 2.37 (s, 3H), 2.26 (s, 3H);  $^{13}\text{C}$  NMR (100 MHz,  $\text{CDCl}_3$ ):  $\delta$  196.5, 161.4, 158.9, 143.4, 137.2, 136.5, 136.3, 129.4, 127.8, 127.3, 126.7, 126.6, 124.0, 116.0, 115.8, 46.7, 39.4, 29.3, 25.0, 21.5; HRMS ( $m/z$ ):  $[\text{M}+\text{Na}]^+$  calcd. for  $\text{C}_{20}\text{H}_{20}\text{FNO}_3\text{SNa}$ , 396.1040; found, 396.1031.

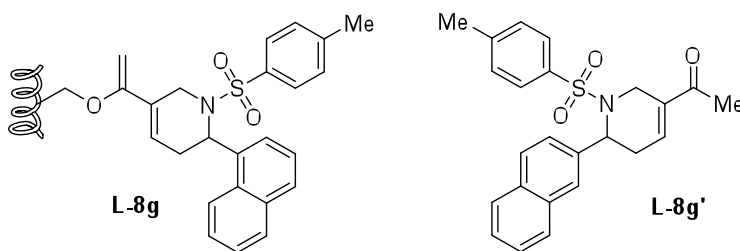

The lantern **L-8g** was treated with 2.5% TFA in DCM (7 mL) to yield a crude product, which was purified by flash column chromatography on the silica gel using 20% ethyl acetate in hexanes to afford compound **L-8g'** as yellow solid in 43% yield, over 4 steps; IR (film)  $\nu_{\text{max}}$  2979, 2917, 1709, 1166  $\text{cm}^{-1}$ ;  $^1\text{H}$  NMR (500 MHz,  $\text{CDCl}_3$ ):  $\delta$  8.59 (d,  $J = 8.5$  Hz, 1H), 7.85 (d,  $J = 8.1$  Hz, 1H), 7.78 (d,  $J = 8.1$  Hz, 1H), 7.68 (d,  $J = 8.2$  Hz, 2H), 7.62 (t,  $J = 7.3$  Hz, 1H), 7.52 (t,  $J = 7.5$  Hz, 1H), 7.28 (t,  $J = 7.7$  Hz, 1H), 7.18-7.16 (m, 3H), 6.96 (t,  $J = 2.3$  Hz, 1H), 6.22 (d,  $J = 7.2$  Hz, 1H), 4.34 (d,  $J = 18.8$  Hz, 1H), 3.22 (dd,  $J = 18.8, 2.6$  Hz, 1H), 2.96 (dd,  $J = 20.0, 3.0$  Hz, 1H), 2.75 (ddd,  $J = 20.0, 4.8, 2.3$  Hz, 1H), 2.36 (s, 3H), 2.23 (s, 3H);  $^{13}\text{C}$  NMR (125 MHz,

CDCl<sub>3</sub>):  $\delta$  196.9, 143.6, 137.8, 136.4, 136.1, 134.0, 133.4, 133.3, 129.4, 129.2, 128.7, 127.5, 126.8, 125.9, 124.5, 124.0, 123.9, 49.0, 38.8, 27.9, 24.9, 21.4; HRMS (m/z): [M+H]<sup>+</sup> calcd. for C<sub>24</sub>H<sub>23</sub>NO<sub>3</sub>SH, 406.1471; found, 406.1458.

### Solid Phase Diels–Alder reaction of the lantern-bound Tebbe Dienes

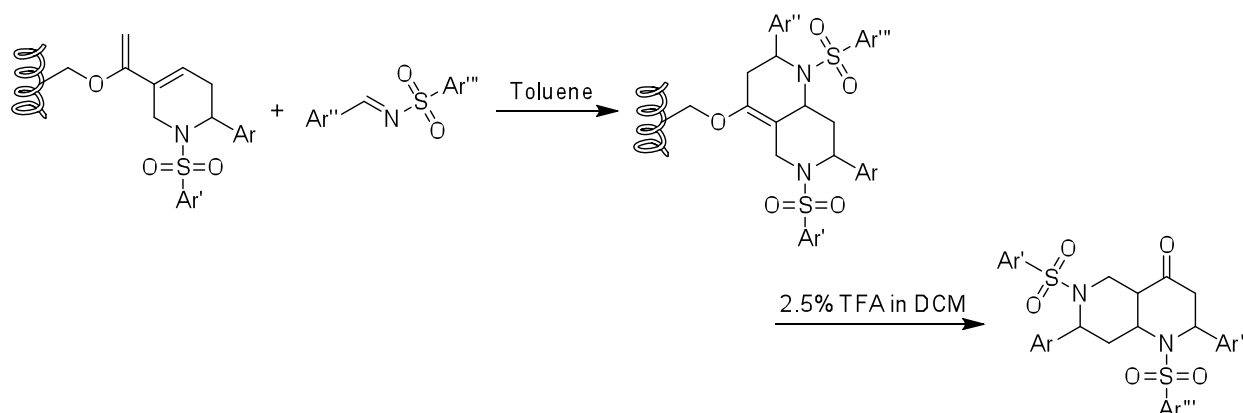

The lanterns from Tebbe reaction was place in an oven-dried 250 mL flasks and charged with Ar. The lanterns were washed three times with freshly distilled toluene (2.5 mL/lantern). The imine (26.0 eq.) was added, charged with Ar, and then the freshly distilled toluene (3 mL/lantern) was added at room temperature. The flask was removed from the Ar line, capped, and then placed aside for 6 days at 80 °C. After the reaction was complete, the lanterns were washed as follows: Toluene (×5), THF (×3), DMF (×3), DMF overnight, DMF (×3), THF (×3), Toluene (×3), THF (×3), DMF overnight, DMF (×3), THF (×3), THF/2.5 M NH<sub>4</sub>Cl (1:1) for 1h, THF/H<sub>2</sub>O (1:1) (×2), THF (×3), DCM (×5). After washing, the product was cleaved from the lantern by adding a solution of 2.5% TFA in DCM (7 mL). (Note: Lanterns were soaked for at least 15 min before changing the solvents.)

The spectroscopic data of the representative  $\alpha,\beta$ -unsaturated ketone products are listed below.

Crystallographic data for **1a** and **1a'** have been deposited with the Cambridge Crystallographic Data Centre as supplementary numbers CCDC 767112 and CCDC 802608. These data can be obtained online free of charge [or from the Cambridge Crystallographic Data Center, 12, Union Road, Cambridge CB2 1EZ, UK; fax: (+44) 1223-336-033; or [deposit@ccdc.cam.ac.uk](mailto:deposit@ccdc.cam.ac.uk)].

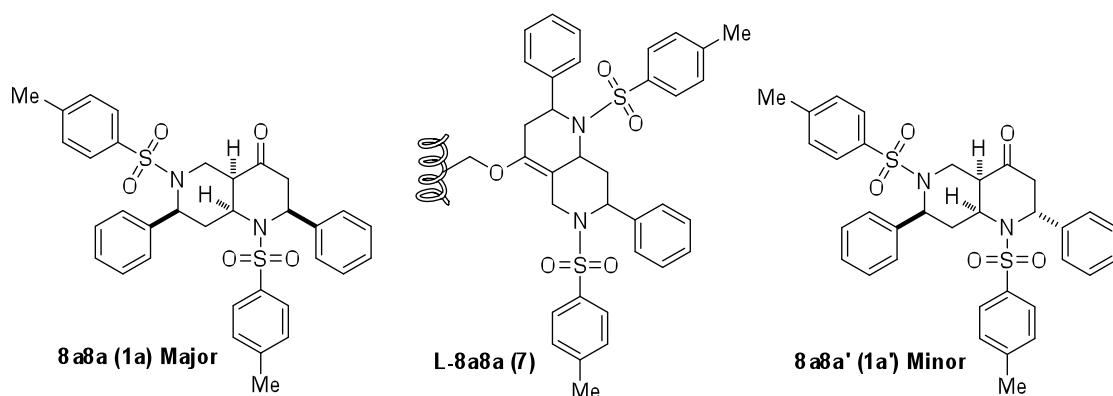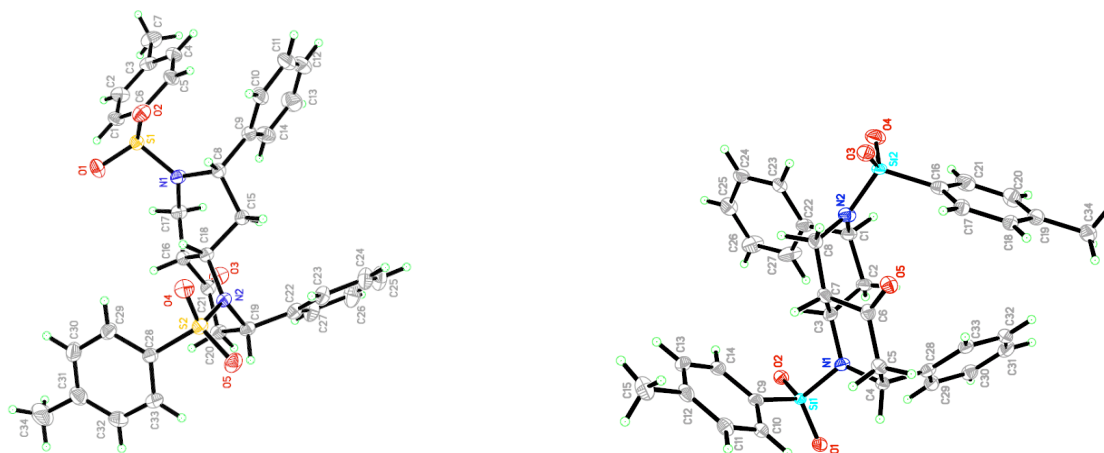

The lantern **L-8a8a (7)** was treated with 2.5% TFA in DCM (7 mL) to yield a crude product, which was purified by flash column chromatography on the silica gel using 20% ethyl acetate in hexanes to afford compounds **8a8a (1a)** and **8a8a' (1a')** as white solid in 38% yield (dr = 97:3), over 5 steps; **8a8a (1a)**: IR (film)  $\nu_{\max}$  3062, 2921, 1714, 1347, 1161, 659  $\text{cm}^{-1}$ ;  $^1\text{H}$  NMR (500 MHz,  $\text{CDCl}_3$ )  $\delta$  7.78 (d,  $J = 8.3$  Hz, 2H), 7.44 (d,  $J = 8.3$  Hz, 2H), 7.40-7.37 (m, 4H), 7.23 (t,  $J = 7.5$  Hz, 2H), 7.18-7.16 (m, 3H), 7.12-7.07 (m, 3H), 6.84-6.83 (m, 2H), 5.72 (d,  $J = 6.7$  Hz, 1H), 4.92 (dd,  $J = 11.2, 7.1$  Hz, 1H), 4.63-4.58 (m, 1H), 3.81 (dd,  $J = 15.3, 8.0$  Hz, 1H), 3.43 (dd,  $J = 15.3, 9.2$  Hz, 1H), 2.95 (dd,  $J = 14.8, 2.0$  Hz, 1H), 2.68 (dd,  $J = 17.5, 8.9$  Hz, 1H), 2.49 (s, 3H), 2.38 (s, 3H), 2.23 (dd,  $J = 14.1, 7.2$  Hz, 1H), 1.76 (ddd,  $J = 13.6, 7.0, 2.0$  Hz, 1H), 0.95 (td,  $J = 13.5, 11.4$  Hz, 1H);  $^{13}\text{C}$  NMR (125 MHz,  $\text{CDCl}_3$ )  $\delta$  206.6, 144.2, 143.2, 140.2, 139.4, 137.4, 137.0, 130.3, 129.4, 128.5, 128.2, 128.0, 127.3, 127.0, 126.7, 125.8, 58.5, 55.1, 53.3, 45.4, 41.4, 40.5, 36.3, 21.6, 21.4; HRMS ( $m/z$ ): calculated for  $\text{C}_{34}\text{H}_{35}\text{N}_2\text{O}_5\text{S}_2\text{N}$  [ $\text{M} + \text{H}$ ] $^+$  615.1902, found 615.1975. **8a8a' (1a')**: IR (film)  $\nu_{\max}$   $\text{cm}^{-1}$ ;  $^1\text{H}$  NMR (500 MHz,  $\text{CDCl}_3$ )  $\delta$  7.71 (d,  $J = 8.5$  Hz, 2H), 7.64 (d,  $J = 8.5$  Hz, 2H), 7.35-7.32 (m, 2H), 7.30-7.25 (m, 10H), 7.21 (d,  $J = 8.0$  Hz, 2H),

5.72 (dd,  $J = 7.3, 3.4$  Hz, 1H), 5.00 (s, 1H), 4.46 (d,  $J = 14.5$  Hz, 1H), 4.42-4.38 (m, 1H), 2.92 (dd,  $J = 14.5, 4.6$  Hz, 1H), 2.85 (dd,  $J = 15.2, 3.4$  Hz, 1H), 2.50-2.49 (m, 4H), 2.44 (s, 3H), 2.15 (t,  $J = 5.4$  Hz, 1H), 1.97-1.93 (m, 1H), 1.27-1.23 (m, 1H);  $^{13}\text{C}$  NMR (125 MHz,  $\text{CDCl}_3$ )  $\delta$  203.8, 144.1, 142.8, 141.1, 137.5, 136.6, 135.3, 130.1, 129.2, 128.9, 128.8, 128.5, 127.6, 127.5, 127.3, 127.0, 126.6, 55.5, 55.2, 51.5, 46.3, 42.1, 37.5, 32.9, 21.6, 21.5; MS (MALDI) calcd. for  $[\text{M} + \text{Na}]^+$  637.18, found 637.08.

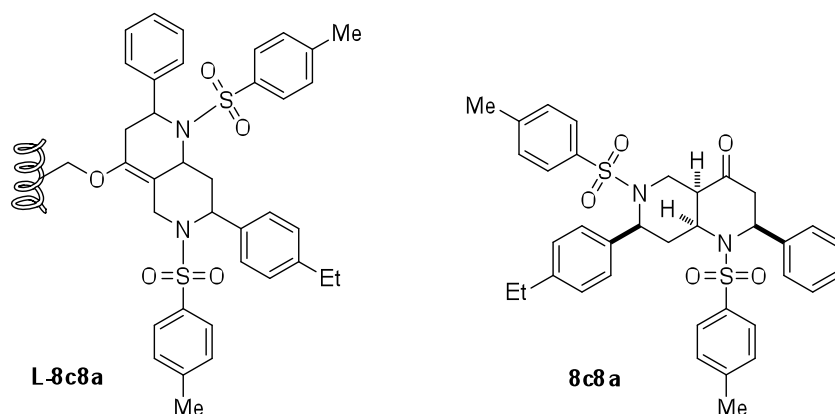

The lantern **L-8c8a** was treated with 2.5% TFA in DCM (7 mL) to yield a crude product, which was purified by flash column chromatography on the silica gel using 20% ethyl acetate in hexanes to afford compound **8c8a** as white solid in 38% yield, over 5 steps; IR (film)  $\nu_{\text{max}}$  3057, 2964, 2921, 1716, 1347, 1162, 660  $\text{cm}^{-1}$ ;  $^1\text{H}$  NMR (500 MHz,  $\text{CDCl}_3$ )  $\delta$  7.77 (d,  $J = 8.1$  Hz, 2H), 7.42-7.36 (m, 6H), 7.23 (d,  $J = 7.5$  Hz, 2H), 7.18-7.14 (m, 3H), 6.90 (d,  $J = 8.0$  Hz, 2H), 6.75 (d,  $J = 8.0$  Hz, 2H), 5.71 (d,  $J = 6.4$  Hz, 1H), 4.87 (dd,  $J = 11.1, 7.0$  Hz, 1H), 4.60 (t,  $J = 10.5$  Hz, 1H), 3.78 (dd,  $J = 15.3, 8.0$  Hz, 1H), 3.47 (dd,  $J = 15.3, 9.1$  Hz, 1H), 2.95 (dd,  $J = 15.0, 1.5$  Hz, 1H), 2.68 (dd,  $J = 17.3, 8.7$  Hz, 1H), 2.52 (q,  $J = 7.6$  Hz, 2H), 2.47 (s, 3H), 2.36 (s, 3H), 2.24 (dd,  $J = 14.7, 7.1$  Hz, 1H), 1.76-1.73 (m, 1H), 1.16 (t,  $J = 7.6$  Hz, 3H), 1.01 (td,  $J = 12.5, 11.7$  Hz, 1H);  $^{13}\text{C}$  NMR (125 MHz,  $\text{CDCl}_3$ )  $\delta$  206.6, 144.2, 143.4, 143.0, 139.5, 137.4, 137.22, 137.21, 130.3, 129.4, 128.5, 128.0, 127.6, 127.3, 127.0, 126.6, 126.0, 58.4, 55.2, 53.4, 45.6, 41.1, 40.4, 36.3, 28.3, 21.5, 21.4, 15.4; HRMS ( $m/z$ ): calculated for  $\text{C}_{36}\text{H}_{39}\text{N}_2\text{O}_5\text{S}_2\text{N}$   $[\text{M} + \text{H}]^+$  643.2215, found 643.2286.

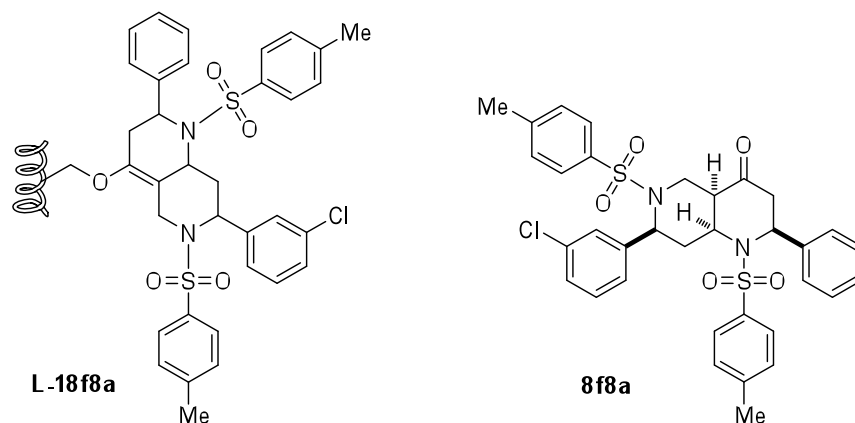

The lantern **L-8f8a** was treated with 2.5% TFA in DCM (7 mL) to yield a crude product, which was purified by flash column chromatography on the silica gel using 20% ethyl acetate in hexanes to afford compound **8f8a** as white solid in 25% yield, over 5 steps; IR (film)  $\nu_{\max}$  3063, 2920, 1714, 1348, 1162, 660  $\text{cm}^{-1}$ ;  $^1\text{H}$  NMR (500 MHz,  $\text{CDCl}_3$ )  $\delta$  7.76 (d,  $J = 8.2$  Hz, 2H), 7.46 (d,  $J = 8.3$  Hz, 2H), 7.39-7.37 (m, 4H), 7.25-7.16 (m, 5H), 7.07-7.01 (m, 2H), 6.75 (d,  $J = 7.4$  Hz, 1H), 6.63 (s, 1H), 5.72 (d,  $J = 6.7$  Hz, 1H), 4.80 (dd,  $J = 11.3, 6.8$  Hz, 1H), 4.59-4.54 (m, 1H), 3.79 (dd,  $J = 15.2, 7.8$  Hz, 1H), 3.46 (dd,  $J = 15.3, 8.9$  Hz, 1H), 2.96 (dd,  $J = 14.8, 1.9$  Hz, 1H), 2.66 (dd,  $J = 17.1, 8.6$  Hz, 1H), 2.47 (s, 3H), 2.38 (s, 3H), 2.24 (dd,  $J = 14.7, 7.1$  Hz, 1H), 1.71 (ddd,  $J = 13.6, 6.8, 2.3$  Hz, 1H), 0.87 (td,  $J = 13.4, 11.5$  Hz, 1H);  $^{13}\text{C}$  NMR (125 MHz,  $\text{CDCl}_3$ )  $\delta$  206.3, 144.2, 143.6, 142.0, 139.4, 137.3, 136.9, 134.0, 130.3, 129.6, 129.5, 128.6, 128.1, 127.5, 127.3, 127.0, 126.6, 126.0, 124.3, 58.0, 55.1, 53.2, 45.4, 41.4, 40.7, 36.4, 21.6, 21.4; HRMS ( $m/z$ ): calculated for  $\text{C}_{34}\text{H}_{34}\text{ClN}_2\text{O}_5\text{S}_2$   $[\text{M} + \text{H}]^+$  649.1516, found 649.1590.

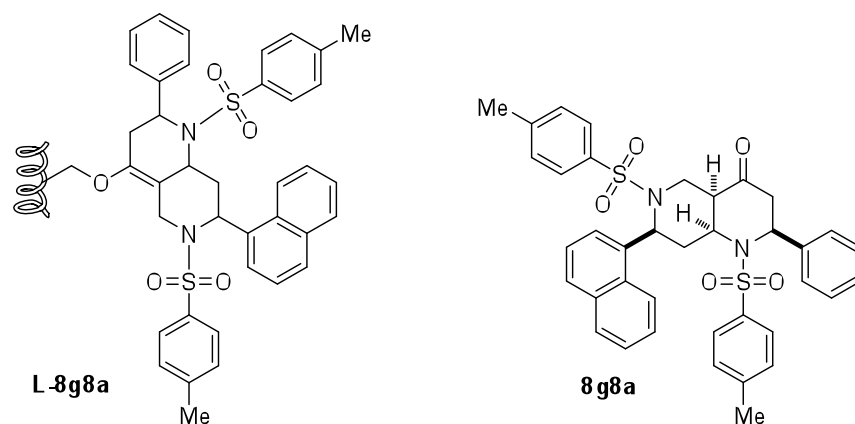

The lantern **L-8g8a** was treated with 2.5% TFA in DCM (7 mL) to yield a crude product, which was purified by flash column chromatography on the silica gel using 20% ethyl acetate in

hexanes to afford compound **8g8a** as white solid in 25% yield, over 5 steps; IR (film)  $\nu_{\max}$  3062, 2914, 1715, 1348, 1162, 660  $\text{cm}^{-1}$ ;  $^1\text{H}$  NMR (400 MHz,  $\text{CDCl}_3$ )  $\delta$  7.83 (d,  $J = 8.2$  Hz, 3H), 7.75 (d,  $J = 7.5$  Hz, 1H), 7.61 (d,  $J = 8.1$  Hz, 1H), 7.52-7.37 (m, 6H), 7.32 (d,  $J = 7.8$  Hz, 2H), 7.16-7.06 (m, 5H), 7.00 (t,  $J = 7.8$  Hz, 2H), 5.71 (d,  $J = 5.9$  Hz, 1H), 5.63 (dd,  $J = 11.6, 6.3$  Hz, 1H), 4.77-4.71 (m, 1H), 4.02 (dd,  $J = 15.4, 7.8$  Hz, 1H), 3.67 (dd,  $J = 15.4, 9.2$  Hz, 1H), 2.97 (dd,  $J = 14.8, 2.3$  Hz, 1H), 2.81 (dd,  $J = 17.3, 8.8$  Hz, 1H), 2.51 (s, 3H), 2.32 (s, 3H), 2.32-2.27 (m, 1H), 1.98 (ddd,  $J = 13.8, 6.2, 2.3$  Hz, 1H), 1.03 (td,  $J = 13.5, 11.9$  Hz, 1H);  $^{13}\text{C}$  NMR (100 MHz,  $\text{CDCl}_3$ )  $\delta$  206.7, 144.3, 143.3, 139.2, 137.5, 136.8, 136.3, 133.6, 130.4, 129.8, 129.3, 128.7, 128.6, 128.1, 128.0, 127.3, 127.2, 126.8, 126.4, 125.6, 125.1, 122.8, 122.5, 56.0, 55.3, 53.9, 46.0, 41.7, 41.6, 37.1, 21.7, 21.5; HRMS ( $m/z$ ): calculated for  $\text{C}_{38}\text{H}_{36}\text{N}_2\text{O}_5\text{S}_2\text{Na}$   $[\text{M} + \text{Na}]^+$  687.1959, found 687.1953.

### LCMS Data of the solid phase naphthyridinone library

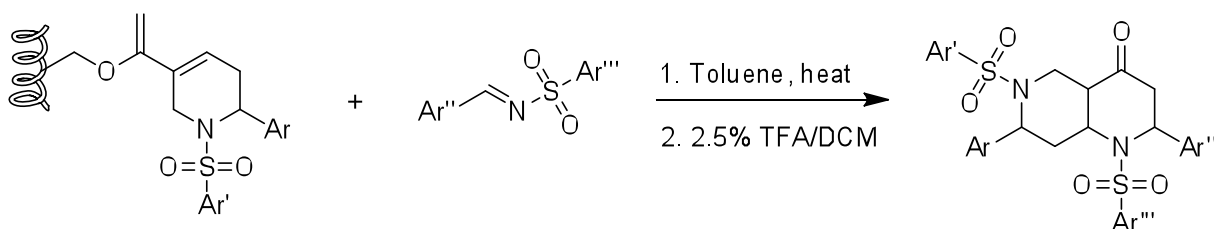

|    | product                           |                                   |                                    |                                   | No.         | $[\text{M}]^a$ | LCMS                     |                         |                     |    |                           |
|----|-----------------------------------|-----------------------------------|------------------------------------|-----------------------------------|-------------|----------------|--------------------------|-------------------------|---------------------|----|---------------------------|
|    | Ar                                | Ar'                               | Ar''                               | Ar'''                             |             |                | RT <sup>b</sup><br>(min) | $[\text{M}+\text{H}]^c$ | Purity <sup>d</sup> |    | Yield <sup>e</sup><br>(%) |
|    |                                   |                                   |                                    |                                   |             |                |                          | % <sup>e</sup>          | % <sup>f</sup>      |    |                           |
| 1  | Ph                                | 4-MeC <sub>6</sub> H <sub>4</sub> | Ph                                 | 4-MeC <sub>6</sub> H <sub>4</sub> | <b>8a8a</b> | 614.1909       | 3.70                     | 615.1975                | 97                  | 78 | 20                        |
| 2  | Ph                                | 4-MeC <sub>6</sub> H <sub>4</sub> | 4-MeC <sub>6</sub> H <sub>4</sub>  | 4-MeC <sub>6</sub> H <sub>4</sub> | <b>8a8b</b> | 628.2066       | 3.79                     | 629.2133                | 91                  | 65 | 4                         |
| 3  | Ph                                | 4-MeC <sub>6</sub> H <sub>4</sub> | 4-EtC <sub>6</sub> H <sub>4</sub>  | 4-MeC <sub>6</sub> H <sub>4</sub> | <b>8a8c</b> | 642.2222       | 3.89                     | 643.2287                | 93                  | 54 | 14                        |
| 4  | Ph                                | 4-MeC <sub>6</sub> H <sub>4</sub> | 2-FC <sub>6</sub> H <sub>4</sub>   | 4-MeC <sub>6</sub> H <sub>4</sub> | <b>8a8d</b> | 632.1815       | 3.62                     | 633.1880                | 96                  | 69 | 18                        |
| 5  | Ph                                | 4-MeC <sub>6</sub> H <sub>4</sub> | 4-ClC <sub>6</sub> H <sub>4</sub>  | 4-MeC <sub>6</sub> H <sub>4</sub> | <b>8a8e</b> | 648.1519       | 3.81                     | 649.1586                | 95                  | 66 | 16                        |
| 6  | Ph                                | 4-MeC <sub>6</sub> H <sub>4</sub> | 3-ClC <sub>6</sub> H <sub>4</sub>  | 4-MeC <sub>6</sub> H <sub>4</sub> | <b>8a8f</b> | 648.1519       | 3.77                     | 649.1589                | 93                  | 72 | 29                        |
| 7  | Ph                                | 4-MeC <sub>6</sub> H <sub>4</sub> | 1-Naphthyl                         | 4-MeC <sub>6</sub> H <sub>4</sub> | <b>8a8g</b> | 664.2066       | 3.81                     | 665.2132                | 84                  | 60 | 21                        |
| 8  | Ph                                | 4-MeC <sub>6</sub> H <sub>4</sub> | 4-MeC <sub>6</sub> H <sub>4</sub>  | 4-ClC <sub>6</sub> H <sub>4</sub> | <b>8a8h</b> | 648.1519       | 3.83                     | 649.1586                | 96                  | 72 | 28                        |
| 9  | Ph                                | 4-MeC <sub>6</sub> H <sub>4</sub> | 4-MeOC <sub>6</sub> H <sub>4</sub> | Ph                                | <b>8a8i</b> | 630.1858       | 3.59                     | 631.1926                | 91                  | 45 | 11                        |
| 10 | Ph                                | 4-MeC <sub>6</sub> H <sub>4</sub> | 4-ClC <sub>6</sub> H <sub>4</sub>  | 2-MeC <sub>6</sub> H <sub>4</sub> | <b>8a8j</b> | 648.1519       | 3.82                     | 649.1584                | 92                  | 69 | 29                        |
| 11 | 4-MeC <sub>6</sub> H <sub>4</sub> | 4-MeC <sub>6</sub> H <sub>4</sub> | Ph                                 | 4-MeC <sub>6</sub> H <sub>4</sub> | <b>8b8a</b> | 628.2066       | 3.78                     | 629.2127                | 97                  | 82 | 21                        |
| 12 | 4-MeC <sub>6</sub> H <sub>4</sub> | 4-MeC <sub>6</sub> H <sub>4</sub> | 4-MeC <sub>6</sub> H <sub>4</sub>  | 4-MeC <sub>6</sub> H <sub>4</sub> | <b>8b8b</b> | 642.2222       | 3.87                     | 643.2290                | 98                  | 72 | 16                        |



|    |                                   |                                   |                                    |                                   |             |          |      |          |    |    |    |
|----|-----------------------------------|-----------------------------------|------------------------------------|-----------------------------------|-------------|----------|------|----------|----|----|----|
| 13 | 4-MeC <sub>6</sub> H <sub>4</sub> | 4-MeC <sub>6</sub> H <sub>4</sub> | 4-EtC <sub>6</sub> H <sub>4</sub>  | 4-MeC <sub>6</sub> H <sub>4</sub> | <b>8b8c</b> | 656.2379 | 3.97 | 657.2450 | 91 | 63 | 12 |
| 14 | 4-MeC <sub>6</sub> H <sub>4</sub> | 4-MeC <sub>6</sub> H <sub>4</sub> | 2-FC <sub>6</sub> H <sub>4</sub>   | 4-MeC <sub>6</sub> H <sub>4</sub> | <b>8b8d</b> | 646.1971 | 3.73 | 647.2037 | 91 | 70 | 20 |
| 15 | 4-MeC <sub>6</sub> H <sub>4</sub> | 4-MeC <sub>6</sub> H <sub>4</sub> | 4-ClC <sub>6</sub> H <sub>4</sub>  | 4-MeC <sub>6</sub> H <sub>4</sub> | <b>8b8e</b> | 662.1676 | 3.89 | 663.1744 | 95 | 65 | 20 |
| 16 | 4-MeC <sub>6</sub> H <sub>4</sub> | 4-MeC <sub>6</sub> H <sub>4</sub> | 3-ClC <sub>6</sub> H <sub>4</sub>  | 4-MeC <sub>6</sub> H <sub>4</sub> | <b>8b8f</b> | 662.1676 | 3.86 | 663.1741 | 96 | 77 | 37 |
| 17 | 4-MeC <sub>6</sub> H <sub>4</sub> | 4-MeC <sub>6</sub> H <sub>4</sub> | 1-Naphthyl                         | 4-MeC <sub>6</sub> H <sub>4</sub> | <b>8b8g</b> | 678.2222 | 3.88 | 679.2292 | 83 | 64 | 27 |
| 18 | 4-MeC <sub>6</sub> H <sub>4</sub> | 4-MeC <sub>6</sub> H <sub>4</sub> | 4-MeC <sub>6</sub> H <sub>4</sub>  | 4-ClC <sub>6</sub> H <sub>4</sub> | <b>8b8h</b> | 662.1676 | 3.91 | 663.1737 | 96 | 79 | 36 |
| 19 | 4-MeC <sub>6</sub> H <sub>4</sub> | 4-MeC <sub>6</sub> H <sub>4</sub> | 4-MeOC <sub>6</sub> H <sub>4</sub> | Ph                                | <b>8b8i</b> | 644.2015 | 3.64 | 645.2083 | 92 | 51 | 13 |
| 20 | 4-MeC <sub>6</sub> H <sub>4</sub> | 4-MeC <sub>6</sub> H <sub>4</sub> | 4-ClC <sub>6</sub> H <sub>4</sub>  | 2-MeC <sub>6</sub> H <sub>4</sub> | <b>8b8j</b> | 662.1676 | 3.92 | 663.1746 | 93 | 72 | 28 |
| 21 | 4-EtC <sub>6</sub> H <sub>4</sub> | 4-MeC <sub>6</sub> H <sub>4</sub> | Ph                                 | 4-MeC <sub>6</sub> H <sub>4</sub> | <b>8c8a</b> | 642.2222 | 3.88 | 643.2286 | 97 | 84 | 30 |
| 22 | 4-EtC <sub>6</sub> H <sub>4</sub> | 4-MeC <sub>6</sub> H <sub>4</sub> | 4-MeC <sub>6</sub> H <sub>4</sub>  | 4-MeC <sub>6</sub> H <sub>4</sub> | <b>8c8b</b> | 656.2379 | 3.96 | 657.2445 | 98 | 75 | 30 |
| 23 | 4-EtC <sub>6</sub> H <sub>4</sub> | 4-MeC <sub>6</sub> H <sub>4</sub> | 4-EtC <sub>6</sub> H <sub>4</sub>  | 4-MeC <sub>6</sub> H <sub>4</sub> | <b>8c8c</b> | 670.2535 | 4.07 | 671.2604 | 92 | 62 | 15 |
| 24 | 4-EtC <sub>6</sub> H <sub>4</sub> | 4-MeC <sub>6</sub> H <sub>4</sub> | 2-FC <sub>6</sub> H <sub>4</sub>   | 4-MeC <sub>6</sub> H <sub>4</sub> | <b>8c8d</b> | 660.2128 | 3.81 | 661.2195 | 91 | 68 | 21 |
| 25 | 4-EtC <sub>6</sub> H <sub>4</sub> | 4-MeC <sub>6</sub> H <sub>4</sub> | 4-ClC <sub>6</sub> H <sub>4</sub>  | 4-MeC <sub>6</sub> H <sub>4</sub> | <b>8c8e</b> | 676.1832 | 3.97 | 677.1900 | 94 | 69 | 17 |
| 26 | 4-EtC <sub>6</sub> H <sub>4</sub> | 4-MeC <sub>6</sub> H <sub>4</sub> | 3-ClC <sub>6</sub> H <sub>4</sub>  | 4-MeC <sub>6</sub> H <sub>4</sub> | <b>8c8f</b> | 676.1832 | 3.97 | 677.1896 | 96 | 81 | 35 |
| 27 | 4-EtC <sub>6</sub> H <sub>4</sub> | 4-MeC <sub>6</sub> H <sub>4</sub> | 1-Naphthyl                         | 4-MeC <sub>6</sub> H <sub>4</sub> | <b>8c8g</b> | 692.2379 | 3.98 | 693.2445 | 75 | 66 | 30 |
| 28 | 4-EtC <sub>6</sub> H <sub>4</sub> | 4-MeC <sub>6</sub> H <sub>4</sub> | 4-MeC <sub>6</sub> H <sub>4</sub>  | 4-ClC <sub>6</sub> H <sub>4</sub> | <b>8c8h</b> | 676.1832 | 4.00 | 677.1900 | 85 | 87 | 36 |
| 29 | 4-EtC <sub>6</sub> H <sub>4</sub> | 4-MeC <sub>6</sub> H <sub>4</sub> | 4-MeOC <sub>6</sub> H <sub>4</sub> | Ph                                | <b>8c8i</b> | 658.2171 | 3.73 | 659.2241 | 91 | 56 | 13 |
| 30 | 4-EtC <sub>6</sub> H <sub>4</sub> | 4-MeC <sub>6</sub> H <sub>4</sub> | 4-ClC <sub>6</sub> H <sub>4</sub>  | 2-MeC <sub>6</sub> H <sub>4</sub> | <b>8c8j</b> | 676.1832 | 4.00 | 677.1900 | 90 | 78 | 28 |
| 31 | 2-FC <sub>6</sub> H <sub>4</sub>  | 4-MeC <sub>6</sub> H <sub>4</sub> | Ph                                 | 4-MeC <sub>6</sub> H <sub>4</sub> | <b>8d8a</b> | 632.1815 | 3.71 | 633.1880 | 92 | 85 | 14 |
| 32 | 2-FC <sub>6</sub> H <sub>4</sub>  | 4-MeC <sub>6</sub> H <sub>4</sub> | 4-MeC <sub>6</sub> H <sub>4</sub>  | 4-MeC <sub>6</sub> H <sub>4</sub> | <b>8d8b</b> | 646.1971 | 3.78 | 647.2042 | 95 | 56 | 10 |
| 33 | 2-FC <sub>6</sub> H <sub>4</sub>  | 4-MeC <sub>6</sub> H <sub>4</sub> | 4-EtC <sub>6</sub> H <sub>4</sub>  | 4-MeC <sub>6</sub> H <sub>4</sub> | <b>8d8c</b> | 660.2128 | 3.88 | 661.2193 | 96 | 51 | 10 |
| 34 | 2-FC <sub>6</sub> H <sub>4</sub>  | 4-MeC <sub>6</sub> H <sub>4</sub> | 2-FC <sub>6</sub> H <sub>4</sub>   | 4-MeC <sub>6</sub> H <sub>4</sub> | <b>8d8d</b> | 650.1721 | 3.61 | 651.1786 | 91 | 57 | 14 |
| 35 | 2-FC <sub>6</sub> H <sub>4</sub>  | 4-MeC <sub>6</sub> H <sub>4</sub> | 4-ClC <sub>6</sub> H <sub>4</sub>  | 4-MeC <sub>6</sub> H <sub>4</sub> | <b>8d8e</b> | 666.1425 | 3.76 | 667.1491 | 84 | 58 | 7  |
| 36 | 2-FC <sub>6</sub> H <sub>4</sub>  | 4-MeC <sub>6</sub> H <sub>4</sub> | 3-ClC <sub>6</sub> H <sub>4</sub>  | 4-MeC <sub>6</sub> H <sub>4</sub> | <b>8d8f</b> | 666.1425 | 3.77 | 667.1489 | 84 | 56 | 10 |
| 37 | 2-FC <sub>6</sub> H <sub>4</sub>  | 4-MeC <sub>6</sub> H <sub>4</sub> | 1-Naphthyl                         | 4-MeC <sub>6</sub> H <sub>4</sub> | <b>8d8g</b> | 682.1971 | 3.80 | 683.2039 | 81 | 68 | 17 |
| 38 | 2-FC <sub>6</sub> H <sub>4</sub>  | 4-MeC <sub>6</sub> H <sub>4</sub> | 4-MeC <sub>6</sub> H <sub>4</sub>  | 4-ClC <sub>6</sub> H <sub>4</sub> | <b>8d8h</b> | 666.1425 | 3.82 | 667.1490 | 92 | 71 | 17 |
| 39 | 2-FC <sub>6</sub> H <sub>4</sub>  | 4-MeC <sub>6</sub> H <sub>4</sub> | 4-MeOC <sub>6</sub> H <sub>4</sub> | Ph                                | <b>8d8i</b> | 648.1764 | 3.59 | 649.1829 | 94 | 49 | 6  |
| 40 | 2-FC <sub>6</sub> H <sub>4</sub>  | 4-MeC <sub>6</sub> H <sub>4</sub> | 4-ClC <sub>6</sub> H <sub>4</sub>  | 2-MeC <sub>6</sub> H <sub>4</sub> | <b>8d8j</b> | 666.1425 | 3.81 | 667.1497 | 84 | 67 | 12 |
| 41 | 4-ClC <sub>6</sub> H <sub>4</sub> | 4-MeC <sub>6</sub> H <sub>4</sub> | Ph                                 | 4-MeC <sub>6</sub> H <sub>4</sub> | <b>8e8a</b> | 648.1519 | 3.82 | 649.1586 | 92 | 80 | 24 |
| 42 | 4-ClC <sub>6</sub> H <sub>4</sub> | 4-MeC <sub>6</sub> H <sub>4</sub> | 4-MeC <sub>6</sub> H <sub>4</sub>  | 4-MeC <sub>6</sub> H <sub>4</sub> | <b>8e8b</b> | 662.1676 | 3.92 | 663.1739 | 96 | 63 | 24 |
| 43 | 4-ClC <sub>6</sub> H <sub>4</sub> | 4-MeC <sub>6</sub> H <sub>4</sub> | 4-EtC <sub>6</sub> H <sub>4</sub>  | 4-MeC <sub>6</sub> H <sub>4</sub> | <b>8e8c</b> | 676.1832 | 4.01 | 677.1902 | 96 | 56 | 14 |
| 44 | 4-ClC <sub>6</sub> H <sub>4</sub> | 4-MeC <sub>6</sub> H <sub>4</sub> | 2-FC <sub>6</sub> H <sub>4</sub>   | 4-MeC <sub>6</sub> H <sub>4</sub> | <b>8e8d</b> | 666.1425 | 3.75 | 667.1494 | 85 | 64 | 17 |
| 45 | 4-ClC <sub>6</sub> H <sub>4</sub> | 4-MeC <sub>6</sub> H <sub>4</sub> | 4-ClC <sub>6</sub> H <sub>4</sub>  | 4-MeC <sub>6</sub> H <sub>4</sub> | <b>8e8e</b> | 682.1130 | 3.92 | 683.1199 | 94 | 57 | 16 |
| 46 | 4-ClC <sub>6</sub> H <sub>4</sub> | 4-MeC <sub>6</sub> H <sub>4</sub> | 3-ClC <sub>6</sub> H <sub>4</sub>  | 4-MeC <sub>6</sub> H <sub>4</sub> | <b>8e8f</b> | 682.1130 | 3.90 | 683.1194 | 96 | 68 | 30 |
| 47 | 4-ClC <sub>6</sub> H <sub>4</sub> | 4-MeC <sub>6</sub> H <sub>4</sub> | 1-Naphthyl                         | 4-MeC <sub>6</sub> H <sub>4</sub> | <b>8e8g</b> | 698.1676 | 3.93 | 699.1739 | 94 | 76 | 23 |

|    |                                    |                                   |                                    |                                   |             |          |      |          |     |    |    |
|----|------------------------------------|-----------------------------------|------------------------------------|-----------------------------------|-------------|----------|------|----------|-----|----|----|
| 48 | 4-ClC <sub>6</sub> H <sub>4</sub>  | 4-MeC <sub>6</sub> H <sub>4</sub> | 4-MeC <sub>6</sub> H <sub>4</sub>  | 4-ClC <sub>6</sub> H <sub>4</sub> | <b>8e8h</b> | 682.1130 | 3.95 | 683.1190 | 94  | 73 | 30 |
| 49 | 4-ClC <sub>6</sub> H <sub>4</sub>  | 4-MeC <sub>6</sub> H <sub>4</sub> | 4-MeOC <sub>6</sub> H <sub>4</sub> | Ph                                | <b>8e8i</b> | 664.1469 | 3.67 | 665.1533 | 80  | 45 | 18 |
| 50 | 4-ClC <sub>6</sub> H <sub>4</sub>  | 4-MeC <sub>6</sub> H <sub>4</sub> | 4-ClC <sub>6</sub> H <sub>4</sub>  | 2-MeC <sub>6</sub> H <sub>4</sub> | <b>8e8j</b> | 682.1130 | 3.90 | 683.1191 | 95  | 67 | 25 |
| 51 | 3-ClC <sub>6</sub> H <sub>4</sub>  | 4-MeC <sub>6</sub> H <sub>4</sub> | Ph                                 | 4-MeC <sub>6</sub> H <sub>4</sub> | <b>8f8a</b> | 648.1519 | 3.76 | 649.1590 | 95  | 78 | 24 |
| 52 | 3-ClC <sub>6</sub> H <sub>4</sub>  | 4-MeC <sub>6</sub> H <sub>4</sub> | 4-MeC <sub>6</sub> H <sub>4</sub>  | 4-MeC <sub>6</sub> H <sub>4</sub> | <b>8f8b</b> | 662.1676 | 3.86 | 663.1737 | 83  | 52 | 6  |
| 53 | 3-ClC <sub>6</sub> H <sub>4</sub>  | 4-MeC <sub>6</sub> H <sub>4</sub> | 4-EtC <sub>6</sub> H <sub>4</sub>  | 4-MeC <sub>6</sub> H <sub>4</sub> | <b>8f8c</b> | 676.1832 | 3.96 | 677.1891 | 84  | 44 | 2  |
| 54 | 3-ClC <sub>6</sub> H <sub>4</sub>  | 4-MeC <sub>6</sub> H <sub>4</sub> | 2-FC <sub>6</sub> H <sub>4</sub>   | 4-MeC <sub>6</sub> H <sub>4</sub> | <b>8f8d</b> | 666.1425 | 3.70 | 667.1492 | 98  | 59 | 14 |
| 55 | 3-ClC <sub>6</sub> H <sub>4</sub>  | 4-MeC <sub>6</sub> H <sub>4</sub> | 4-ClC <sub>6</sub> H <sub>4</sub>  | 4-MeC <sub>6</sub> H <sub>4</sub> | <b>8f8e</b> | 682.1130 | 3.86 | 683.1193 | 97  | 53 | 16 |
| 56 | 3-ClC <sub>6</sub> H <sub>4</sub>  | 4-MeC <sub>6</sub> H <sub>4</sub> | 3-ClC <sub>6</sub> H <sub>4</sub>  | 4-MeC <sub>6</sub> H <sub>4</sub> | <b>8f8f</b> | 682.1130 | 3.83 | 683.1195 | 99  | 63 | 26 |
| 57 | 3-ClC <sub>6</sub> H <sub>4</sub>  | 4-MeC <sub>6</sub> H <sub>4</sub> | 1-Naphthyl                         | 4-MeC <sub>6</sub> H <sub>4</sub> | <b>8f8g</b> | 698.1676 | 3.86 | 699.1736 | 81  | 60 | 23 |
| 58 | 3-ClC <sub>6</sub> H <sub>4</sub>  | 4-MeC <sub>6</sub> H <sub>4</sub> | 4-MeC <sub>6</sub> H <sub>4</sub>  | 4-ClC <sub>6</sub> H <sub>4</sub> | <b>8f8h</b> | 682.1130 | 3.90 | 683.1191 | 93  | 70 | 29 |
| 59 | 3-ClC <sub>6</sub> H <sub>4</sub>  | 4-MeC <sub>6</sub> H <sub>4</sub> | 4-MeOC <sub>6</sub> H <sub>4</sub> | Ph                                | <b>8f8i</b> | 664.1469 | 3.64 | 665.1538 | 99  | 46 | 18 |
| 60 | 3-ClC <sub>6</sub> H <sub>4</sub>  | 4-MeC <sub>6</sub> H <sub>4</sub> | 4-ClC <sub>6</sub> H <sub>4</sub>  | 2-MeC <sub>6</sub> H <sub>4</sub> | <b>8f8j</b> | 682.1130 | 3.90 | 683.1195 | 94  | 65 | 25 |
| 61 | 1-Naphthyl                         | 4-MeC <sub>6</sub> H <sub>4</sub> | Ph                                 | 4-MeC <sub>6</sub> H <sub>4</sub> | <b>8g8a</b> | 664.2066 | 3.75 | 665.2134 | 93  | 81 | 19 |
| 62 | 1-Naphthyl                         | 4-MeC <sub>6</sub> H <sub>4</sub> | 4-MeC <sub>6</sub> H <sub>4</sub>  | 4-MeC <sub>6</sub> H <sub>4</sub> | <b>8g8b</b> | 678.2222 | 3.85 | 679.2283 | 93  | 53 | 17 |
| 63 | 1-Naphthyl                         | 4-MeC <sub>6</sub> H <sub>4</sub> | 4-EtC <sub>6</sub> H <sub>4</sub>  | 4-MeC <sub>6</sub> H <sub>4</sub> | <b>8g8c</b> | 692.2379 | 3.94 | 693.2439 | 88  | 32 | 3  |
| 64 | 1-Naphthyl                         | 4-MeC <sub>6</sub> H <sub>4</sub> | 2-FC <sub>6</sub> H <sub>4</sub>   | 4-MeC <sub>6</sub> H <sub>4</sub> | <b>8g8d</b> | 682.1971 | 3.72 | 683.2041 | 100 | 69 | 22 |
| 65 | 1-Naphthyl                         | 4-MeC <sub>6</sub> H <sub>4</sub> | 4-ClC <sub>6</sub> H <sub>4</sub>  | 4-MeC <sub>6</sub> H <sub>4</sub> | <b>8g8e</b> | 698.1676 | 3.87 | 699.1736 | 92  | 55 | 14 |
| 66 | 1-Naphthyl                         | 4-MeC <sub>6</sub> H <sub>4</sub> | 3-ClC <sub>6</sub> H <sub>4</sub>  | 4-MeC <sub>6</sub> H <sub>4</sub> | <b>8g8f</b> | 698.1676 | 3.83 | 699.1742 | 72  | 58 | 39 |
| 67 | 1-Naphthyl                         | 4-MeC <sub>6</sub> H <sub>4</sub> | 1-Naphthyl                         | 4-MeC <sub>6</sub> H <sub>4</sub> | <b>8g8g</b> | 714.2222 | 3.86 | 715.2278 | 87  | 64 | 7  |
| 68 | 1-Naphthyl                         | 4-MeC <sub>6</sub> H <sub>4</sub> | 4-MeC <sub>6</sub> H <sub>4</sub>  | 4-ClC <sub>6</sub> H <sub>4</sub> | <b>8g8h</b> | 698.1676 | 3.88 | 699.1742 | 90  | 64 | 24 |
| 69 | 1-Naphthyl                         | 4-MeC <sub>6</sub> H <sub>4</sub> | 4-MeOC <sub>6</sub> H <sub>4</sub> | Ph                                | <b>8g8i</b> | 680.2015 | 3.63 | 681.2081 | 89  | 41 | 8  |
| 70 | 1-Naphthyl                         | 4-MeC <sub>6</sub> H <sub>4</sub> | 4-ClC <sub>6</sub> H <sub>4</sub>  | 2-MeC <sub>6</sub> H <sub>4</sub> | <b>8g8j</b> | 698.1676 | 3.87 | 699.1739 | 88  | 62 | 24 |
| 71 | 4-MeC <sub>6</sub> H <sub>4</sub>  | 4-ClC <sub>6</sub> H <sub>4</sub> | Ph                                 | 4-MeC <sub>6</sub> H <sub>4</sub> | <b>8h8a</b> | 648.1519 | 3.82 | 649.1585 | 94  | 81 | 21 |
| 72 | 4-MeC <sub>6</sub> H <sub>4</sub>  | 4-ClC <sub>6</sub> H <sub>4</sub> | 4-MeC <sub>6</sub> H <sub>4</sub>  | 4-MeC <sub>6</sub> H <sub>4</sub> | <b>8h8b</b> | 662.1676 | 3.90 | 663.1742 | 90  | 48 | 19 |
| 73 | 4-MeC <sub>6</sub> H <sub>4</sub>  | 4-ClC <sub>6</sub> H <sub>4</sub> | 4-EtC <sub>6</sub> H <sub>4</sub>  | 4-MeC <sub>6</sub> H <sub>4</sub> | <b>8h8c</b> | 676.1832 | 4.02 | 677.1891 | 100 | 62 | 16 |
| 74 | 4-MeC <sub>6</sub> H <sub>4</sub>  | 4-ClC <sub>6</sub> H <sub>4</sub> | 2-FC <sub>6</sub> H <sub>4</sub>   | 4-MeC <sub>6</sub> H <sub>4</sub> | <b>8h8d</b> | 666.1425 | 3.77 | 667.1485 | 95  | 62 | 20 |
| 75 | 4-MeC <sub>6</sub> H <sub>4</sub>  | 4-ClC <sub>6</sub> H <sub>4</sub> | 4-ClC <sub>6</sub> H <sub>4</sub>  | 4-MeC <sub>6</sub> H <sub>4</sub> | <b>8h8e</b> | 682.1130 | 3.80 | 683.1196 | 76  | 43 | 11 |
| 76 | 4-MeC <sub>6</sub> H <sub>4</sub>  | 4-ClC <sub>6</sub> H <sub>4</sub> | 3-ClC <sub>6</sub> H <sub>4</sub>  | 4-MeC <sub>6</sub> H <sub>4</sub> | <b>8h8f</b> | 682.1130 | 3.89 | 683.1190 | 99  | 71 | 29 |
| 77 | 4-MeC <sub>6</sub> H <sub>4</sub>  | 4-ClC <sub>6</sub> H <sub>4</sub> | 1-Naphthyl                         | 4-MeC <sub>6</sub> H <sub>4</sub> | <b>8h8g</b> | 698.1676 | 3.93 | 699.1738 | 92  | 71 | 21 |
| 78 | 4-MeC <sub>6</sub> H <sub>4</sub>  | 4-ClC <sub>6</sub> H <sub>4</sub> | 4-MeC <sub>6</sub> H <sub>4</sub>  | 4-ClC <sub>6</sub> H <sub>4</sub> | <b>8h8h</b> | 682.1130 | 3.44 | 683.1190 | 97  | 71 | 24 |
| 79 | 4-MeC <sub>6</sub> H <sub>4</sub>  | 4-ClC <sub>6</sub> H <sub>4</sub> | 4-MeOC <sub>6</sub> H <sub>4</sub> | Ph                                | <b>8h8i</b> | 664.1469 | 3.70 | 665.1531 | 95  | 43 | 12 |
| 80 | 4-MeC <sub>6</sub> H <sub>4</sub>  | 4-ClC <sub>6</sub> H <sub>4</sub> | 4-ClC <sub>6</sub> H <sub>4</sub>  | 2-MeC <sub>6</sub> H <sub>4</sub> | <b>8h8j</b> | 682.1130 | 3.94 | 683.1191 | 96  | 70 | 25 |
| 81 | 4-MeOC <sub>6</sub> H <sub>4</sub> | Ph                                | Ph                                 | 4-MeC <sub>6</sub> H <sub>4</sub> | <b>8i8a</b> | 630.1858 | 3.56 | 631.1912 | 95  | 85 | 26 |
| 82 | 4-MeOC <sub>6</sub> H <sub>4</sub> | Ph                                | 4-MeC <sub>6</sub> H <sub>4</sub>  | 4-MeC <sub>6</sub> H <sub>4</sub> | <b>8i8b</b> | 644.2015 | 3.65 | 645.2066 | 93  | 58 | 22 |

|     |                                    |                                   |                                    |                                   |             |          |      |          |    |    |    |
|-----|------------------------------------|-----------------------------------|------------------------------------|-----------------------------------|-------------|----------|------|----------|----|----|----|
| 83  | 4-MeOC <sub>6</sub> H <sub>4</sub> | Ph                                | 4-EtC <sub>6</sub> H <sub>4</sub>  | 4-MeC <sub>6</sub> H <sub>4</sub> | <b>8j8c</b> | 658.2171 | 3.75 | 659.2224 | 98 | 56 | 13 |
| 84  | 4-MeOC <sub>6</sub> H <sub>4</sub> | Ph                                | 2-FC <sub>6</sub> H <sub>4</sub>   | 4-MeC <sub>6</sub> H <sub>4</sub> | <b>8j8d</b> | 648.1764 | 3.53 | 649.1819 | 92 | 42 | 21 |
| 85  | 4-MeOC <sub>6</sub> H <sub>4</sub> | Ph                                | 4-ClC <sub>6</sub> H <sub>4</sub>  | 4-MeC <sub>6</sub> H <sub>4</sub> | <b>8j8e</b> | 664.1469 | 3.68 | 665.1517 | 46 | 26 | 18 |
| 86  | 4-MeOC <sub>6</sub> H <sub>4</sub> | Ph                                | 3-ClC <sub>6</sub> H <sub>4</sub>  | 4-MeC <sub>6</sub> H <sub>4</sub> | <b>8j8f</b> | 664.1469 | 3.64 | 665.1525 | 95 | 68 | 11 |
| 87  | 4-MeOC <sub>6</sub> H <sub>4</sub> | Ph                                | 1-Naphthyl                         | 4-MeC <sub>6</sub> H <sub>4</sub> | <b>8j8g</b> | 680.2015 | 3.68 | 681.2071 | 98 | 80 | 23 |
| 88  | 4-MeOC <sub>6</sub> H <sub>4</sub> | Ph                                | 4-MeC <sub>6</sub> H <sub>4</sub>  | 4-ClC <sub>6</sub> H <sub>4</sub> | <b>8j8h</b> | 664.1469 | 3.71 | 682.1800 | 89 | 65 | 26 |
| 89  | 4-MeOC <sub>6</sub> H <sub>4</sub> | Ph                                | 4-MeOC <sub>6</sub> H <sub>4</sub> | Ph                                | <b>8j8i</b> | 646.1807 | 3.47 | 647.1871 | 96 | 48 | 12 |
| 90  | 4-MeOC <sub>6</sub> H <sub>4</sub> | Ph                                | 4-ClC <sub>6</sub> H <sub>4</sub>  | 2-MeC <sub>6</sub> H <sub>4</sub> | <b>8j8j</b> | 664.1469 | 3.56 | 682.1789 | 88 | 37 | 8  |
| 91  | 4-ClC <sub>6</sub> H <sub>4</sub>  | 2-MeC <sub>6</sub> H <sub>4</sub> | Ph                                 | 4-MeC <sub>6</sub> H <sub>4</sub> | <b>8j8a</b> | 648.1519 | 3.84 | 649.1579 | 89 | 84 | 16 |
| 92  | 4-ClC <sub>6</sub> H <sub>4</sub>  | 2-MeC <sub>6</sub> H <sub>4</sub> | 4-MeC <sub>6</sub> H <sub>4</sub>  | 4-MeC <sub>6</sub> H <sub>4</sub> | <b>8j8b</b> | 662.1676 | 3.94 | 663.1741 | 93 | 64 | 24 |
| 93  | 4-ClC <sub>6</sub> H <sub>4</sub>  | 2-MeC <sub>6</sub> H <sub>4</sub> | 4-EtC <sub>6</sub> H <sub>4</sub>  | 4-MeC <sub>6</sub> H <sub>4</sub> | <b>8j8c</b> | 676.1832 | 4.04 | 677.1889 | 94 | 37 | 11 |
| 94  | 4-ClC <sub>6</sub> H <sub>4</sub>  | 2-MeC <sub>6</sub> H <sub>4</sub> | 2-FC <sub>6</sub> H <sub>4</sub>   | 4-MeC <sub>6</sub> H <sub>4</sub> | <b>8j8d</b> | 666.1425 | 3.77 | 667.1490 | 80 | 62 | 23 |
| 95  | 4-ClC <sub>6</sub> H <sub>4</sub>  | 2-MeC <sub>6</sub> H <sub>4</sub> | 4-ClC <sub>6</sub> H <sub>4</sub>  | 4-MeC <sub>6</sub> H <sub>4</sub> | <b>8j8e</b> | 682.1130 | 3.94 | 683.1182 | 94 | 56 | 14 |
| 96  | 4-ClC <sub>6</sub> H <sub>4</sub>  | 2-MeC <sub>6</sub> H <sub>4</sub> | 3-ClC <sub>6</sub> H <sub>4</sub>  | 4-MeC <sub>6</sub> H <sub>4</sub> | <b>8j8f</b> | 682.1130 | 3.92 | 683.1188 | 92 | 71 | 25 |
| 97  | 4-ClC <sub>6</sub> H <sub>4</sub>  | 2-MeC <sub>6</sub> H <sub>4</sub> | 1-Naphthyl                         | 4-MeC <sub>6</sub> H <sub>4</sub> | <b>8j8g</b> | 698.1676 | 3.97 | 699.1747 | 84 | 69 | 24 |
| 98  | 4-ClC <sub>6</sub> H <sub>4</sub>  | 2-MeC <sub>6</sub> H <sub>4</sub> | 4-MeC <sub>6</sub> H <sub>4</sub>  | 4-ClC <sub>6</sub> H <sub>4</sub> | <b>8j8h</b> | 682.1130 | 4.00 | 683.1172 | 74 | 76 | 19 |
| 99  | 4-ClC <sub>6</sub> H <sub>4</sub>  | 2-MeC <sub>6</sub> H <sub>4</sub> | 4-MeOC <sub>6</sub> H <sub>4</sub> | Ph                                | <b>8j8i</b> | 664.1469 | 3.75 | 665.1538 | 88 | 45 | 12 |
| 100 | 4-ClC <sub>6</sub> H <sub>4</sub>  | 2-MeC <sub>6</sub> H <sub>4</sub> | 4-ClC <sub>6</sub> H <sub>4</sub>  | 2-MeC <sub>6</sub> H <sub>4</sub> | <b>8j8j</b> | 682.1130 | 4.01 | 683.1190 | 82 | 54 | 15 |

<sup>a</sup> Calculated exact mass. <sup>b</sup> Retention time. <sup>c</sup> High resolution mass found. <sup>d</sup> UV area percent. <sup>e</sup> Final purity after prep HPLC purification. <sup>f</sup> Crude purity after TFA cleaving. <sup>g</sup> Final isolated yield based on the lantern capacity after prep HPLC isolation.

## Solution phase medicinal chemistry and characterization of compounds

### Synthesis of naphthyridine enol ethers **11'** and naphthyridinones **11**

All dienes (**9**), naphthyridine enol ethers (**11'**), and naphthyridinones (**11**) were synthesized according to procedures reported previously.<sup>5</sup>

<sup>5</sup> Wang Z, et al. (2010) Diversity Through a Branched Reaction Pathway: Generation of Multicyclic Scaffolds and Identification of Antimigratory Agents. *Chem Eur J* Published online on Nov 9; DOI: 10.1002/chem.201002195.

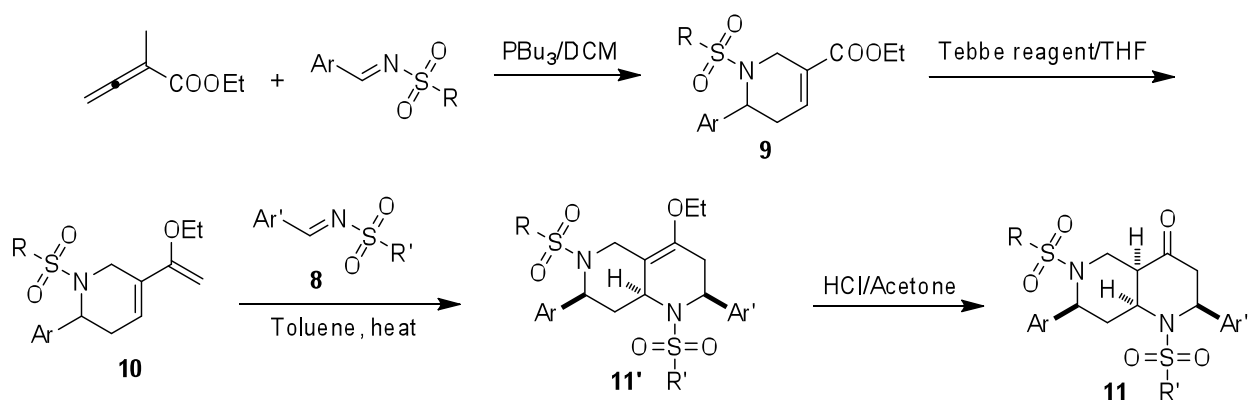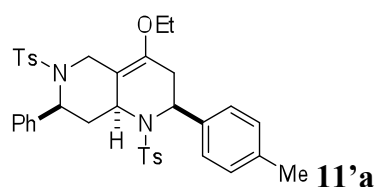

71% yield; white solid; IR (film)  $\nu_{\max}$  3030, 2978, 2923, 1701, 1346, 1162, 668  $\text{cm}^{-1}$ ;  $^1\text{H}$  NMR (500 MHz,  $\text{CDCl}_3$ )  $\delta$  7.55 (d,  $J = 8.2$  Hz, 2H), 7.51 (d,  $J = 8.2$  Hz, 2H), 7.28 (d,  $J = 8.1$  Hz, 2H), 7.22 (d,  $J = 8.0$  Hz, 4H), 7.14-7.11 (m, 3H), 7.05 (d,  $J = 8.0$  Hz, 2H), 6.93-6.92 (m, 2H), 5.15 (d,  $J = 5.8$  Hz, 1H), 4.80 (t,  $J = 8.7$  Hz, 1H), 4.26 (d,  $J = 16.4$  Hz, 1H), 4.14-4.08 (m, 2H), 3.80 (dq,  $J = 9.8, 7.1$  Hz, 1H), 2.51 (d,  $J = 16.5$  Hz, 1H), 2.45 (s, 3H), 2.39 (s, 3H), 2.26-2.20 (m, 4H), 1.93-1.88 (m, 1H), 1.23-1.15 (m, 4H);  $^{13}\text{C}$  NMR (125 MHz,  $\text{CDCl}_3$ )  $\delta$  143.4, 142.9, 142.6, 140.8, 137.5, 137.1, 136.6, 136.5, 129.7, 129.3, 128.9, 127.9, 127.3, 127.2, 127.1, 126.7, 126.6, 110.6, 63.3, 58.3, 52.4, 51.7, 42.7, 38.5, 25.6, 21.5, 21.4, 20.8, 15.1; MS (MALDI) calcd. for  $\text{C}_{37}\text{H}_{40}\text{N}_2\text{O}_5\text{S}_2\text{Na}$   $[\text{M} + \text{Na}]^+$  679.23, found 679.68.

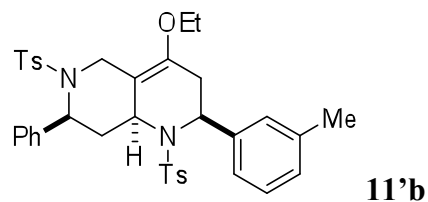

78% yield; white solid; IR (film)  $\nu_{\max}$  3030, 2978, 2917, 1702, 1346, 1161, 656  $\text{cm}^{-1}$ ;  $^1\text{H}$  NMR (500 MHz,  $\text{CDCl}_3$ )  $\delta$  7.55 (d,  $J = 8.2$  Hz, 2H), 7.52 (d,  $J = 8.2$  Hz, 2H), 7.28 (d,  $J = 8.0$  Hz, 2H), 7.22 (d,  $J = 8.1$  Hz, 4H), 7.18 (s, 1H), 7.14-7.13 (m, 5H), 7.00-6.94 (m, 3H), 5.15 (d,  $J = 6.3$  Hz, 1H), 4.85 (t,  $J = 8.7$  Hz, 1H), 4.28 (d,  $J = 16.7$  Hz, 1H), 4.18-4.12 (m, 2H), 3.80 (dq,  $J = 9.8, 7.1$

Hz, 1H), 3.64 (dq,  $J = 9.8, 7.1$  Hz, 1H), 2.51 (d,  $J = 16.5$  Hz, 1H), 2.44 (s, 3H), 2.38 (s, 3H), 2.30-2.25 (m, 4H), 1.92-1.87 (m, 1H), 1.28 (td,  $J = 12.7, 10.0$  Hz, 1H), 1.15 (t,  $J = 7.1$  Hz, 3H);  $^{13}\text{C}$  NMR (125 MHz,  $\text{CDCl}_3$ )  $\delta$  143.5, 143.0, 142.7, 140.8, 139.7, 137.8, 137.4, 136.7, 129.8, 129.4, 128.4, 128.2, 128.1, 128.0, 127.1, 126.7, 126.6, 124.2, 110.5, 63.3, 58.2, 52.6, 51.7, 42.7, 38.4, 25.4, 21.5, 21.45, 21.42, 15.1; MS (MALDI) calcd. for  $\text{C}_{37}\text{H}_{40}\text{N}_2\text{O}_5\text{S}_2\text{Na}$   $[\text{M} + \text{Na}]^+$  679.23, found 679.66.

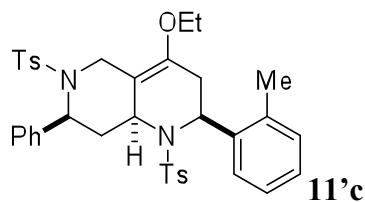

68% yield; white solid; IR (film)  $\nu_{\text{max}}$  3030, 2979, 2925, 1702, 1348, 1162, 654  $\text{cm}^{-1}$ ;  $^1\text{H}$  NMR (500 MHz,  $\text{CDCl}_3$ )  $\delta$  7.62 (d,  $J = 8.2$  Hz, 2H), 7.45 (d,  $J = 8.2$  Hz, 2H), 7.27 (d,  $J = 8.0$  Hz, 2H), 7.18 (d,  $J = 8.1$  Hz, 2H), 7.13-7.06 (m, 7H), 6.87 (dd,  $J = 7.8, 1.1$  Hz, 2H), 5.47 (d,  $J = 6.1$  Hz, 1H), 4.71 (dd,  $J = 9.6, 7.6$  Hz, 1H), 4.25-4.19 (m, 2H), 4.13 (d,  $J = 17.1$  Hz, 1H), 3.64 (dq,  $J = 10.0, 7.1$  Hz, 1H), 3.46 (dq,  $J = 10.0, 7.1$  Hz, 1H), 2.49 (s, 3H), 2.42 (s, 3H), 2.39-2.36 (m, 4H), 2.26-2.21 (m, 1H), 2.10-2.04 (m, 1H), 1.27-1.16 (m, 1H), 1.01 (t,  $J = 7.1$  Hz, 3H);  $^{13}\text{C}$  NMR (125 MHz,  $\text{CDCl}_3$ )  $\delta$  143.6, 143.2, 142.9, 140.4, 137.8, 137.4, 136.8, 136.6, 131.3, 129.6, 129.2, 127.9, 127.8, 127.4, 127.2, 127.1, 126.9, 126.8, 125.4, 110.7, 63.2, 58.6, 52.0, 51.3, 42.9, 36.6, 27.0, 21.4, 20.2, 14.9; MS (MALDI) calcd. for  $\text{C}_{37}\text{H}_{40}\text{N}_2\text{O}_5\text{S}_2\text{Na}$   $[\text{M} + \text{Na}]^+$  679.23, found 679.50.

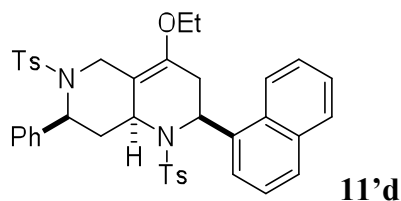

67% yield; white solid; IR (film)  $\nu_{\text{max}}$  3053, 2978, 2921, 1702, 1346, 1161, 658  $\text{cm}^{-1}$ ;  $^1\text{H}$  NMR (500 MHz,  $\text{CDCl}_3$ )  $\delta$  8.68 (d,  $J = 8.7$  Hz, 1H), 7.78 (d,  $J = 8.2$  Hz, 1H), 7.72 (d,  $J = 7.9$  Hz, 1H), 7.66 (d,  $J = 8.1$  Hz, 2H), 7.59 (t,  $J = 7.6$  Hz, 1H), 7.48-7.45 (m, 3H), 7.36-7.30 (m, 2H), 7.27-7.26 (m, 2H), 7.20 (d,  $J = 8.0$  Hz, 2H), 7.12-7.07 (m, 3H), 6.81 (d,  $J = 6.5$  Hz, 2H), 6.12 (d,  $J = 6.2$  Hz, 1H), 4.58 (t,  $J = 8.6$  Hz, 1H), 4.24 (s, 2H), 4.14 (d,  $J = 12.0$  Hz, 1H), 3.67 (dq,  $J = 9.9,$

7.1 Hz, 1H), 3.52 (dq,  $J = 9.9, 7.1$  Hz, 1H), 2.60 (d,  $J = 16.6$  Hz, 1H), 2.48-2.42 (m, 4H), 2.39 (s, 3H), 1.76-1.72 (m, 1H), 1.08-1.01 (m, 4H);  $^{13}\text{C}$  NMR (125 MHz,  $\text{CDCl}_3$ )  $\delta$  143.8, 143.5, 136.6, 135.0, 133.8, 129.6, 129.3, 128.9, 128.7, 127.9, 127.6, 127.1, 126.8, 126.4, 125.7, 125.1, 124.6, 124.4, 124.0, 110.2, 63.3, 58.5, 52.0, 50.4, 42.9, 36.3, 27.8, 21.4, 15.0; MS (MALDI) calcd. for  $\text{C}_{40}\text{H}_{40}\text{N}_2\text{O}_5\text{S}_2\text{Na}$   $[\text{M} + \text{Na}]^+$  715.23, found 715.54.

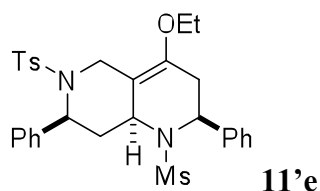

60% yield; white solid; IR (film)  $\nu_{\text{max}}$  3030, 2979, 2929, 1673, 1336, 1157, 664  $\text{cm}^{-1}$ ;  $^1\text{H}$  NMR (500 MHz,  $\text{CDCl}_3$ )  $\delta$  7.57 (d,  $J = 8.2$  Hz, 2H), 7.33 (d,  $J = 7.7$  Hz, 2H), 7.26-7.21 (m, 4H), 7.19-7.14 (m, 4H), 7.02-7.00 (m, 2H), 5.24 (d,  $J = 5.7$  Hz, 1H), 4.81 (dd,  $J = 10.1, 7.8$  Hz, 1H), 4.55 (d,  $J = 17.4$  Hz, 1H), 4.05 (d,  $J = 17.6$  Hz, 1H), 3.96 (dq,  $J = 9.6, 7.1$  Hz, 1H), 3.84 (dq,  $J = 9.6, 7.1$  Hz, 1H), 3.55 (d,  $J = 12.4$  Hz, 1H), 2.83 (d,  $J = 16.6$  Hz, 1H), 2.63 (s, 3H), 2.56-2.51 (m, 1H), 2.38 (s, 3H), 2.30-2.28 (m, 1H), 1.32 (t,  $J = 7.1$  Hz, 1H), 1.15 (td,  $J = 12.8, 10.5$  Hz, 1H);  $^{13}\text{C}$  NMR (125 MHz,  $\text{CDCl}_3$ )  $\delta$  143.0, 142.7, 140.8, 139.6, 136.7, 129.4, 128.9, 128.3, 128.1, 127.5, 127.2, 127.1, 126.2, 110.7, 63.5, 58.0, 52.6, 51.3, 42.5, 38.0, 37.9, 27.0, 21.4, 15.5; MS (MALDI) calcd. for  $\text{C}_{30}\text{H}_{34}\text{N}_2\text{O}_5\text{S}_2\text{Na}$   $[\text{M} + \text{Na}]^+$  589.18, found 589.32.

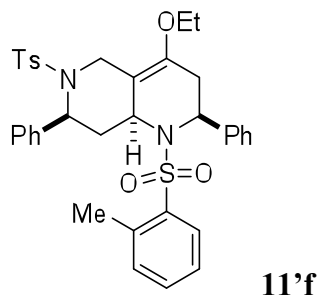

80% yield; white solid; IR (film)  $\nu_{\text{max}}$  3062, 2978, 2925, 1674, 1311, 1161, 664  $\text{cm}^{-1}$ ;  $^1\text{H}$  NMR (500 MHz,  $\text{CDCl}_3$ )  $\delta$  7.77 (d,  $J = 7.8$  Hz, 1H), 7.49-7.46 (m, 3H), 7.37-7.30 (m, 4H), 7.24 (d,  $J = 7.8$  Hz, 2H), 7.20-7.11 (m, 6H), 6.94-6.92 (m, 2H), 5.06 (d,  $J = 5.8$  Hz, 1H), 4.68 (dd,  $J = 9.7, 7.5$  Hz, 1H), 4.29 (s, 2H), 4.18 (d,  $J = 12.2$  Hz, 1H), 3.91 (dq,  $J = 9.7, 7.1$  Hz, 1H), 3.78 (dq,  $J = 9.7, 7.1$  Hz, 1H), 2.63 (d,  $J = 16.0$  Hz, 1H), 2.56 (s, 3H), 2.33-2.29 (m, 4H), 2.17-2.12 (m, 1H),

1.28-1.19 (m, 4H);  $^{13}\text{C}$  NMR (125 MHz,  $\text{CDCl}_3$ )  $\delta$  143.1, 143.0, 140.7, 139.6, 138.0, 137.5, 136.3, 132.9, 132.8, 129.4, 129.2, 128.3, 128.0, 127.6, 127.2, 127.0, 126.7, 126.2, 110.7, 63.5, 58.6, 52.2, 51.5, 43.2, 38.1, 26.4, 21.4, 20.6, 15.3; MS (MALDI) calcd. for  $\text{C}_{36}\text{H}_{38}\text{N}_2\text{O}_5\text{S}_2\text{Na}$  [ $\text{M} + \text{Na}$ ] $^+$  665.21, found 665.48.

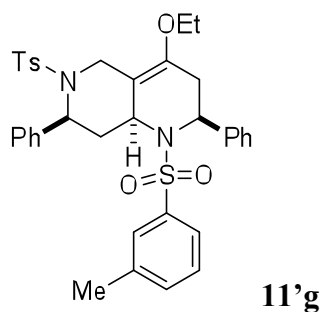

61% yield; white solid; IR (film)  $\nu_{\text{max}}$  3060, 2977, 2921, 1699, 1344, 1160, 663  $\text{cm}^{-1}$ ;  $^1\text{H}$  NMR (500 MHz,  $\text{CDCl}_3$ )  $\delta$  7.64 (s, 1H), 7.47 (d,  $J = 8.0$  Hz, 2H), 7.42-7.35 (m, 5H), 7.25-7.23 (m, 2H), 7.19-7.16 (m, 3H), 7.11-7.09 (m, 3H), 6.89 (d,  $J = 6.9$  Hz, 2H), 4.82 (t,  $J = 8.7$  Hz, 1H), 4.28-4.22 (m, 2H), 4.11 (d,  $J = 17.3$  Hz, 1H), 3.81 (dq,  $J = 9.9, 7.5$  Hz, 1H), 3.64 (dq,  $J = 9.9, 7.5$  Hz, 1H), 2.54 (d,  $J = 16.5$  Hz, 1H), 2.44 (s, 3H), 2.36 (s, 3H), 2.27-2.22 (m, 1H), 1.96-1.92 (m, 1H), 1.88-1.14 (m, 4H);  $^{13}\text{C}$  NMR (125 MHz,  $\text{CDCl}_3$ )  $\delta$  142.9, 142.5, 140.6, 140.1, 139.6, 139.4, 136.6, 133.5, 129.3, 129.0, 128.3, 128.0, 127.4, 127.3, 127.1, 126.7, 123.6, 110.9, 63.4, 58.3, 52.6, 51.8, 42.7, 38.5, 25.5, 21.4, 21.3, 15.1; MS (MALDI) calcd. for  $\text{C}_{36}\text{H}_{38}\text{N}_2\text{O}_5\text{S}_2\text{Na}$  [ $\text{M} + \text{Na}$ ] $^+$  665.21, found 665.45.

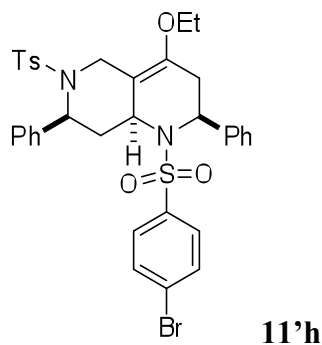

75% yield; white solid; IR (film)  $\nu_{\text{max}}$  3060, 2977, 1699, 1346, 1162, 664  $\text{cm}^{-1}$ ;  $^1\text{H}$  NMR (500 MHz,  $\text{CDCl}_3$ )  $\delta$  7.65 (d,  $J = 8.5$  Hz, 2H), 7.56 (d,  $J = 8.5$  Hz, 2H), 7.49 (d,  $J = 8.2$  Hz, 2H), 7.35 (d,  $J = 7.7$  Hz, 2H), 7.28-7.25 (m, 2H), 7.21-7.18 (m, 3H), 7.13-7.09 (m, 3H), 6.90 (dd,  $J = 7.5,$

1.6 Hz, 2H), 5.21 (d,  $J = 5.8$  Hz, 1H), 4.84 (dd,  $J = 9.6, 8.0$  Hz, 1H), 4.28 (d,  $J = 17.0$  Hz, 1H), 4.17 (d,  $J = 12.4$  Hz, 1H), 4.08 (d,  $J = 17.0$  Hz, 1H), 3.83 (dq,  $J = 9.8, 7.1$  Hz, 1H), 3.67 (dq,  $J = 9.8, 7.1$  Hz, 1H), 2.59 (d,  $J = 16.5$  Hz, 1H), 2.38 (s, 3H), 2.28-2.23 (m, 1H), 1.98-1.93 (m, 1H), 1.23-1.14 (m, 4H);  $^{13}\text{C}$  NMR (125 MHz,  $\text{CDCl}_3$ )  $\delta$  143.0, 142.4, 140.5, 139.4, 139.3, 136.7, 132.5, 129.3, 128.4, 128.2, 128.0, 127.63, 127.62, 127.4, 127.2, 127.1, 126.6, 110.7, 63.4, 58.1, 52.7, 52.0, 42.6, 38.3, 25.6, 21.4, 15.1; MS (MALDI) calcd. for  $\text{C}_{35}\text{H}_{35}\text{BrN}_2\text{O}_5\text{S}_2\text{Na}$   $[\text{M} + \text{Na}]^+$  731.10, found 731.40.

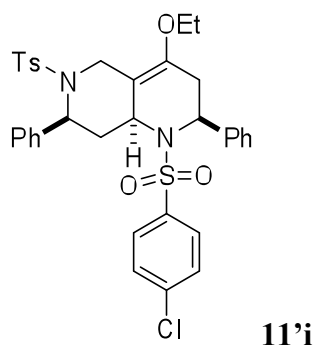

76% yield; white solid; IR (film)  $\nu_{\text{max}}$  3062, 2979, 2925, 1699, 1346, 1163, 665  $\text{cm}^{-1}$ ;  $^1\text{H}$  NMR (500 MHz,  $\text{CDCl}_3$ )  $\delta$  7.63 (d,  $J = 8.6$  Hz, 2H), 7.49-7.47 (m, 4H), 7.35 (d,  $J = 7.7$  Hz, 2H), 7.27-7.24 (m, 2H), 7.20-7.18 (m, 3H), 7.14-7.09 (m, 3H), 6.89 (dd,  $J = 7.6, 1.6$  Hz, 2H), 5.21 (d,  $J = 5.8$  Hz, 1H), 4.84 (dd,  $J = 9.6, 8.0$  Hz, 1H), 4.28 (d,  $J = 16.7$  Hz, 1H), 4.17 (d,  $J = 12.4$  Hz, 1H), 4.08 (d,  $J = 17.0$  Hz, 1H), 3.83 (dq,  $J = 9.8, 7.1$  Hz, 1H), 3.66 (dq,  $J = 9.8, 7.1$  Hz, 1H), 2.59 (d,  $J = 16.5$  Hz, 1H), 2.38 (s, 3H), 2.28-2.23 (m, 1H), 1.98-1.92 (m, 1H), 1.21-1.13 (m, 4H);  $^{13}\text{C}$  NMR (125 MHz,  $\text{CDCl}_3$ )  $\delta$  142.9, 142.4, 140.5, 139.3, 139.2, 138.9, 136.7, 129.5, 129.3, 128.4, 128.1, 128.0, 127.6, 127.4, 127.2, 127.1, 126.6, 110.7, 63.4, 58.1, 52.7, 51.9, 42.6, 38.3, 25.6, 21.4, 15.1; MS (MALDI) calcd. for  $\text{C}_{35}\text{H}_{35}\text{ClN}_2\text{O}_5\text{S}_2\text{Na}$   $[\text{M} + \text{Na}]^+$  685.16, found 685.48.

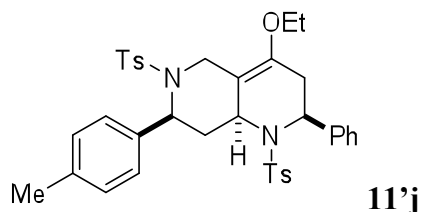

81% yield; white solid; IR (film)  $\nu_{\text{max}}$  3027, 2978, 2917, 1700, 1344, 1162, 655  $\text{cm}^{-1}$ ;  $^1\text{H}$  NMR (400 MHz,  $\text{CDCl}_3$ )  $\delta$  7.56 (d,  $J = 8.3$  Hz, 2H), 7.50 (d,  $J = 8.3$  Hz, 2H), 7.36 (d,  $J = 7.5$  Hz, 2H),



7.30-7.18 (m, 7H), 6.92 (d,  $J = 7.9$  Hz, 2H), 6.81 (d,  $J = 8.0$  Hz, 2H), 5.19 (d,  $J = 5.7$  Hz, 1H), 4.77 (dd,  $J = 9.7, 7.7$  Hz, 1H), 4.26 (d,  $J = 16.6$  Hz, 1H), 4.17-4.09 (m, 2H), 3.81 (dq,  $J = 9.8, 7.0$  Hz, 1H), 3.65 (dq,  $J = 9.8, 7.0$  Hz, 1H), 2.53 (d,  $J = 16.5$  Hz, 1H), 2.44 (s, 3H), 2.38 (s, 3H), 2.26-2.19 (m, 4H), 1.95-1.88 (m, 1H), 1.22-1.15 (m, 4H);  $^{13}\text{C}$  NMR (125 MHz,  $\text{CDCl}_3$ )  $\delta$  143.6, 143.0, 142.6, 139.8, 137.8, 137.6, 136.9, 136.8, 129.9, 129.4, 128.9, 128.4, 127.6, 127.3, 126.9, 126.7, 111.0, 63.5, 58.4, 52.7, 52.0, 42.8, 38.7, 25.6, 21.6, 21.0, 15.2; MS (MALDI) calcd. for  $\text{C}_{37}\text{H}_{40}\text{N}_2\text{O}_5\text{S}_2\text{Na}$   $[\text{M} + \text{Na}]^+$  679.23, found 679.55.

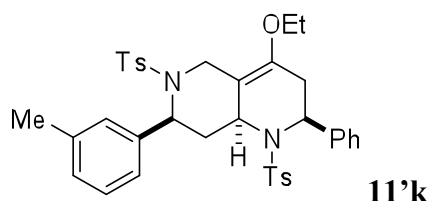

85% yield; white solid; IR (film)  $\nu_{\text{max}}$  3029, 2978, 2913, 1702, 1345, 1162, 656  $\text{cm}^{-1}$ ;  $^1\text{H}$  NMR (400 MHz,  $\text{CDCl}_3$ )  $\delta$  7.58 (d,  $J = 7.6$  Hz, 2H), 7.47 (d,  $J = 7.7$  Hz, 2H), 7.36 (d,  $J = 7.6$  Hz, 2H), 7.29 (d,  $J = 8.0$  Hz, 2H), 7.24 (d,  $J = 7.6$  Hz, 2H), 7.19-7.16 (m, 3H), 7.01 (t,  $J = 7.5$  Hz, 1H), 6.92 (d,  $J = 7.4$  Hz, 1H), 6.74 (d,  $J = 7.5$  Hz, 1H), 6.63 (s, 1H), 5.19 (d,  $J = 5.7$  Hz, 1H), 4.76 (dd,  $J = 9.8, 7.6$  Hz, 1H), 4.29 (d,  $J = 16.7$  Hz, 1H), 4.18-4.11 (m, 2H), 3.82 (dq,  $J = 9.5, 6.9$  Hz, 1H), 3.65 (dq,  $J = 9.5, 6.9$  Hz, 1H), 2.54 (d,  $J = 16.4$  Hz, 1H), 2.45 (s, 3H), 2.37 (s, 3H), 2.24-2.19 (m, 1H), 2.16 (s, 3H), 1.95-1.91 (m, 1H), 1.20-1.16 (m, 4H);  $^{13}\text{C}$  NMR (125 MHz,  $\text{CDCl}_3$ )  $\delta$  143.5, 142.8, 142.5, 140.5, 139.7, 137.5, 137.4, 136.9, 129.8, 129.2, 128.2, 127.9, 127.8, 127.4, 127.37, 127.35, 127.1, 126.8, 123.8, 111.0, 63.4, 58.5, 52.6, 51.9, 42.8, 38.7, 25.6, 21.5, 21.4, 21.2, 15.1; MS (MALDI) calcd. for  $\text{C}_{37}\text{H}_{40}\text{N}_2\text{O}_5\text{S}_2\text{Na}$   $[\text{M} + \text{Na}]^+$  679.23, found 679.73.

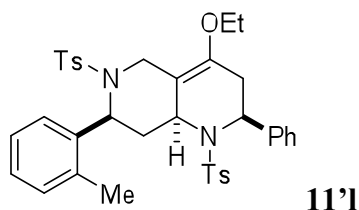

83 yield; white solid; IR (film)  $\nu_{\text{max}}$  3063, 2978, 2921, 1699, 1345, 1162, 656  $\text{cm}^{-1}$ ;  $^1\text{H}$  NMR (400 MHz,  $\text{CDCl}_3$ )  $\delta$  7.65 (d,  $J = 8.1$  Hz, 2H), 7.38-7.30 (m, 6H), 7.28-7.23 (m, 2H), 7.17 (t,  $J = 7.2$  Hz, 1H), 7.11 (d,  $J = 8.1$  Hz, 2H), 7.00 (t,  $J = 7.4$  Hz, 1H), 6.92 (d,  $J = 7.4$  Hz, 1H), 6.87 (t,  $J = 7.4$  Hz, 1H), 6.78 (d,  $J = 7.7$  Hz, 1H), 5.23 (d,  $J = 5.8$  Hz, 1H), 4.79 (dd,  $J = 11.3, 5.7$  Hz, 1H),

4.43 (d,  $J = 16.3$  Hz, 1H), 4.26-4.20 (m, 2H), 3.86 (dq,  $J = 9.6, 7.0$  Hz, 1H), 3.70 (dq,  $J = 9.6, 7.0$  Hz, 1H), 2.59 (d,  $J = 16.5$  Hz, 1H), 2.45 (s, 3H), 2.36 (s, 3H), 2.18 (s, 3H), 2.14-2.10 (m, 1H), 2.02-1.97 (m, 1H), 1.28-1.20 (m, 4H);  $^{13}\text{C}$  NMR (100 MHz,  $\text{CDCl}_3$ )  $\delta$  143.5, 142.7, 142.6, 139.7, 138.9, 137.4, 136.7, 134.9, 130.1, 129.8, 129.0, 128.3, 127.4, 127.3, 127.0, 126.9, 126.8, 126.5, 125.7, 111.2, 63.5, 56.9, 52.8, 43.9, 38.5, 25.9, 21.5, 21.3, 19.0, 15.2; MS (MALDI) calcd. for  $\text{C}_{37}\text{H}_{40}\text{N}_2\text{O}_5\text{S}_2\text{Na}$   $[\text{M} + \text{Na}]^+$  679.23, found 679.37.

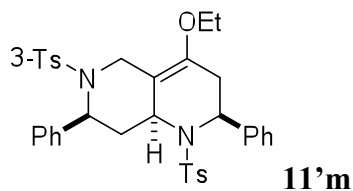

87% yield; white solid; IR (film)  $\nu_{\text{max}}$  3057, 2978, 2914, 1699, 1301, 1161, 657  $\text{cm}^{-1}$ ;  $^1\text{H}$  NMR (500 MHz,  $\text{CDCl}_3$ )  $\delta$  7.55 (d,  $J = 8.0$  Hz, 2H), 7.45-7.44 (m, 1H), 7.36-7.23 (m, 9H), 7.17 (t,  $J = 7.2$  Hz, 1H), 7.12-7.09 (m, 3H), 6.92-6.91 (m, 2H), 5.18 (d,  $J = 5.7$  Hz, 1H), 4.85 (dd,  $J = 10.4, 7.1$  Hz, 1H), 4.35 (d,  $J = 16.8$  Hz, 1H), 4.15 (d,  $J = 12.3$  Hz, 1H), 4.09 (d,  $J = 16.8$  Hz, 1H), 3.81 (dq,  $J = 9.7, 7.0$  Hz, 1H), 3.65 (dq,  $J = 9.7, 7.0$  Hz, 1H), 2.54 (d,  $J = 16.5$  Hz, 1H), 2.45 (s, 3H), 2.31-2.24 (m, 4H), 1.94-1.89 (m, 1H), 1.23-1.16 (m, 4H);  $^{13}\text{C}$  NMR (125 MHz,  $\text{CDCl}_3$ )  $\delta$  143.4, 142.5, 140.6, 139.7, 139.6, 139.0, 137.4, 132.9, 129.8, 128.5, 128.2, 128.0, 127.5, 127.4, 127.3, 127.1, 126.8, 126.6, 124.2, 111.0, 63.4, 58.4, 52.6, 51.8, 42.6, 38.5, 25.6, 21.4, 21.2, 15.1; MS (MALDI) calcd. for  $\text{C}_{36}\text{H}_{38}\text{N}_2\text{O}_5\text{S}_2\text{Na}$   $[\text{M} + \text{Na}]^+$  665.21, found 665.62.

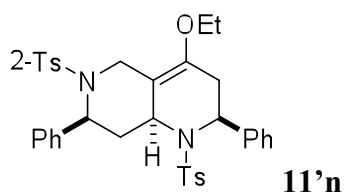

86% yield; white solid; IR (film)  $\nu_{\text{max}}$  3060, 2978, 2924, 1703, 1338, 1158, 656  $\text{cm}^{-1}$ ;  $^1\text{H}$  NMR (500 MHz,  $\text{CDCl}_3$ )  $\delta$  7.73 (d,  $J = 8.2$  Hz, 2H), 7.44 (d,  $J = 7.6$  Hz, 2H), 7.34-7.20 (m, 8H), 7.12 (t,  $J = 7.8$  Hz, 1H), 6.97-6.90 (m, 2H), 6.83 (t,  $J = 7.7$  Hz, 2H), 6.56 (t,  $J = 7.3$  Hz, 2H), 5.35 (d,  $J = 6.1$  Hz, 1H), 4.66 (d,  $J = 15.3$  Hz, 1H), 4.53 (dd,  $J = 10.6, 5.7$  Hz, 1H), 4.42 (d,  $J = 12.0$  Hz, 1H), 3.88-3.82 (m, 2H), 3.68 (dq,  $J = 9.6, 7.0$  Hz, 1H), 2.60 (d,  $J = 16.6$  Hz, 1H), 2.48 (s, 3H), 2.45 (s, 3H), 2.13-2.09 (m, 1H), 2.04-2.00 (m, 1H), 1.19-1.06 (m, 4H);  $^{13}\text{C}$  NMR (125 MHz,

CDCl<sub>3</sub>)  $\delta$  143.5, 143.3, 140.0, 138.7, 137.5, 137.0, 131.9, 131.7, 129.9, 129.3, 128.2, 127.8, 127.7, 127.5, 127.4, 127.3, 126.7, 125.6, 110.9, 63.6, 60.0, 52.6, 42.5, 39.0, 25.3, 21.4, 19.8, 15.0; MS (MALDI) calcd. for C<sub>36</sub>H<sub>38</sub>N<sub>2</sub>O<sub>5</sub>S<sub>2</sub>Na [M + Na]<sup>+</sup> 665.21, found 665.60.

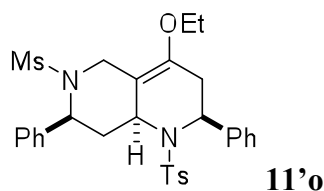

81% yield; white solid; IR (film)  $\nu_{\max}$  3031, 2979, 2930, 1701, 1341, 1164, 657 cm<sup>-1</sup>; <sup>1</sup>H NMR (500 MHz, CDCl<sub>3</sub>)  $\delta$  7.79 (d,  $J$  = 8.2 Hz, 2H), 7.43 (d,  $J$  = 7.7 Hz, 2H), 7.34 (d,  $J$  = 8.2 Hz, 2H), 7.30-7.26 (m, 2H), 7.24-7.18 (m, 4H), 7.03-7.02 (m, 2H), 5.37 (d,  $J$  = 5.8 Hz, 1H), 4.88 (dd,  $J$  = 9.7, 8.0 Hz, 1H), 4.53 (d,  $J$  = 12.2 Hz, 1H), 4.26 (d,  $J$  = 16.2 Hz, 1H), 4.07 (d,  $J$  = 16.4 Hz, 1H), 3.85 (dq,  $J$  = 9.6, 7.1 Hz, 1H), 3.64 (dq,  $J$  = 9.6, 7.1 Hz, 1H), 2.64 (d,  $J$  = 16.5 Hz, 1H), 2.43 (s, 3H), 2.35-2.30 (m, 1H), 2.28 (s, 3H), 2.14-2.09 (m, 1H), 1.26 (td,  $J$  = 12.7, 10.2 Hz, 1H), 1.15 (t,  $J$  = 7.1 Hz, 3H); <sup>13</sup>C NMR (125 MHz, CDCl<sub>3</sub>)  $\delta$  143.7, 142.7, 139.9, 139.8, 137.3, 130.0, 128.5, 128.3, 127.9, 127.6, 127.5, 127.3, 126.7, 110.4, 63.4, 58.4, 52.6, 51.7, 42.4, 39.4, 37.9, 25.5, 21.5, 15.1; MS (MALDI) calcd. for C<sub>30</sub>H<sub>34</sub>N<sub>2</sub>O<sub>5</sub>S<sub>2</sub>Na [M + Na]<sup>+</sup> 589.18, found 589.33.

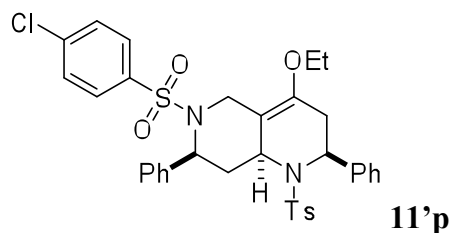

82% yield; white solid; IR (film)  $\nu_{\max}$  3062, 2979, 2925, 1699, 1349, 1163, 657 cm<sup>-1</sup>; <sup>1</sup>H NMR (500 MHz, CDCl<sub>3</sub>)  $\delta$  7.61 (d,  $J$  = 8.2 Hz, 2H), 7.47 (d,  $J$  = 8.6 Hz, 2H), 7.37 (d,  $J$  = 7.6 Hz, 2H), 7.34-7.31 (m, 4H), 7.26-7.24 (m, 2H), 7.19-7.15 (m, 1H), 7.13-7.08 (m, 3H), 6.90 (d,  $J$  = 6.7 Hz, 2H), 5.23 (d,  $J$  = 5.7 Hz, 1H), 4.83 (dd,  $J$  = 10.2, 7.4 Hz, 1H), 4.33 (d,  $J$  = 16.7 Hz, 1H), 4.19-4.11 (m, 2H), 3.82 (dq,  $J$  = 9.7, 7.0 Hz, 1H), 3.65 (dq,  $J$  = 9.7, 7.0 Hz, 1H), 2.57 (d,  $J$  = 16.4 Hz, 1H), 2.44 (s, 3H), 2.33-2.28 (m, 1H), 1.96-1.91 (m, 1H), 1.23 (td,  $J$  = 12.7, 10.7 Hz, 1H), 1.16 (t,  $J$  = 7.0 Hz, 3H); <sup>13</sup>C NMR (125 MHz, CDCl<sub>3</sub>)  $\delta$  143.7, 142.9, 140.2, 139.7, 138.5, 138.4, 137.2, 130.0, 128.9, 128.5, 128.3, 128.1, 127.5, 127.39, 127.37, 126.7, 126.6, 110.2, 63.3, 58.8, 52.7,

51.9, 42.8, 38.7, 25.6, 21.5, 15.2; MS (MALDI) calcd. for  $C_{35}H_{35}ClN_2O_5S_2Na$   $[M + Na]^+$  685.16, found 685.24.

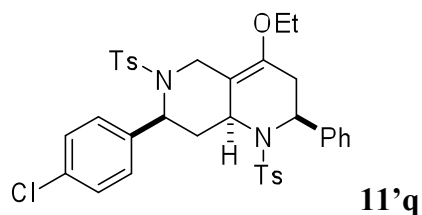

85% yield; white solid; IR (film)  $\nu_{\max}$  3062, 2978, 2917, 1702, 1346, 1162, 655  $cm^{-1}$ ;  $^1H$  NMR (500 MHz,  $CDCl_3$ )  $\delta$  7.54 (d,  $J = 8.2$  Hz, 2H), 7.49 (d,  $J = 8.6$  Hz, 2H), 7.35 (d,  $J = 7.6$  Hz, 2H), 7.28-7.16 (m, 6H), 7.06 (d,  $J = 8.5$  Hz, 2H), 6.82 (d,  $J = 8.4$  Hz, 2H), 5.17 (d,  $J = 5.7$  Hz, 1H), 4.71 (dd,  $J = 9.8, 7.4$  Hz, 1H), 4.21-4.10 (m, 3H), 3.80 (dq,  $J = 9.7, 7.0$  Hz, 1H), 3.63 (dq,  $J = 9.7, 7.0$  Hz, 1H), 2.52 (d,  $J = 16.6$  Hz, 1H), 2.42 (s, 3H), 2.38 (s, 3H), 2.21-2.14 (m, 1H), 1.92-1.87 (m, 1H), 1.16-1.06 (m, 4H);  $^{13}C$  NMR (125 MHz,  $CDCl_3$ )  $\delta$  143.6, 143.2, 142.9, 139.6, 139.3, 137.4, 136.4, 132.9, 129.8, 129.4, 128.3, 128.1, 128.0, 127.48, 127.47, 127.1, 126.7, 110.2, 63.4, 57.9, 52.5, 51.7, 42.9, 38.7, 25.3, 21.5, 15.1; MS (MALDI) calcd. for  $C_{36}H_{37}ClN_2O_5S_2Na$   $[M + Na]^+$  699.17, found 699.41.

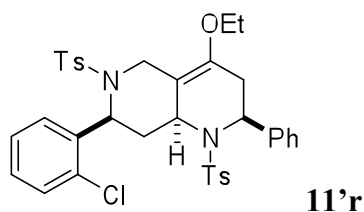

85% yield; white solid; IR (film)  $\nu_{\max}$  3062, 2978, 2917, 1698, 1348, 1163, 656  $cm^{-1}$ ;  $^1H$  NMR (500 MHz,  $CDCl_3$ )  $\delta$  7.58 (d,  $J = 8.2$  Hz, 2H), 7.53 (d,  $J = 8.2$  Hz, 2H), 7.33-7.28 (m, 4H), 7.24-7.21 (m, 4H), 7.17-7.13 (m, 2H), 7.08-7.04 (m, 4H), 5.22 (d,  $J = 5.7$  Hz, 1H), 4.94 (dd,  $J = 12.3, 6.9$  Hz, 1H), 4.39-4.32 (m, 2H), 4.02 (d,  $J = 12.2$  Hz, 1H), 3.85 (dq,  $J = 9.7, 7.1$  Hz, 1H), 3.70 (dq,  $J = 9.7, 7.1$  Hz, 1H), 2.57 (d,  $J = 16.4$  Hz, 1H), 2.44 (s, 3H), 2.40 (s, 3H), 2.26-2.22 (m, 1H), 2.01-1.96 (m, 1H), 1.21 (t,  $J = 7.1$  Hz, 3H), 1.08 (td,  $J = 12.6, 12.2$  Hz, 1H);  $^{13}C$  NMR (125 MHz,  $CDCl_3$ )  $\delta$  143.6, 143.1, 142.9, 139.7, 138.8, 137.3, 135.9, 131.6, 129.8, 129.3, 129.2, 128.3, 128.2, 128.0, 127.4, 127.3, 127.2, 126.9, 126.6, 110.8, 63.5, 56.8, 52.7, 52.4, 43.9, 37.6, 26.0, 21.5, 15.2; MS (MALDI) calcd. for  $C_{36}H_{37}ClN_2O_5S_2Na$   $[M + Na]^+$  699.17, found 699.38.

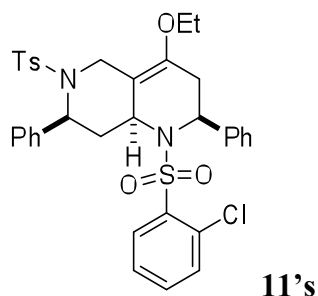

81% yield; white solid; IR (film)  $\nu_{\max}$  3063, 2979, 1700, 1346, 1162, 700  $\text{cm}^{-1}$ ;  $^1\text{H}$  NMR (500 MHz,  $\text{CDCl}_3$ )  $\delta$  8.10 (d,  $J = 8.0$  Hz, 1H), 7.53-7.38 (m, 7H), 7.27-7.24 (m, 2H), 7.20-7.10 (m, 6H), 6.93-6.91 (m, 2H), 5.08 (d,  $J = 5.7$  Hz, 1H), 4.71 (t,  $J = 8.5$  Hz, 1H), 4.30 (d,  $J = 16.4$  Hz, 1H), 4.16 (d,  $J = 16.4$  Hz, 1H), 3.92-3.86 (m, 1H), 3.79-3.73 (m, 1H), 2.60 (d,  $J = 16.5$  Hz, 1H), 2.36 (s, 3H), 2.29-2.25 (m, 2H), 1.31-1.24 (m, 4H);  $^{13}\text{C}$  NMR (125 MHz,  $\text{CDCl}_3$ )  $\delta$  143.1, 143.0, 140.8, 139.4, 137.2, 136.3, 133.9, 132.4, 132.1, 131.7, 129.4, 128.3, 128.0, 127.6, 127.3, 127.2, 127.1, 126.8, 110.8, 63.6, 58.8, 52.6, 52.2, 43.2, 38.6, 26.5, 21.4, 15.3; MS (MALDI) calcd. for  $\text{C}_{35}\text{H}_{35}\text{ClN}_2\text{O}_5\text{S}_2\text{Na}$   $[\text{M} + \text{Na}]^+$  685.16, found 685.68.

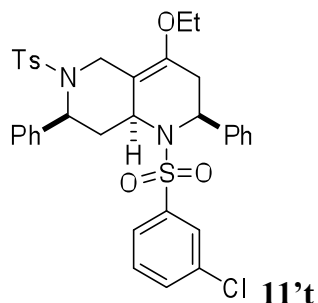

70% yield; white solid; IR (film)  $\nu_{\max}$  3063, 2979, 1672, 1345, 1164, 668  $\text{cm}^{-1}$ ;  $^1\text{H}$  NMR (500 MHz,  $\text{CDCl}_3$ )  $\delta$  7.73 (t,  $J = 1.7$  Hz, 1H), 7.58-7.55 (m, 2H), 7.51 (d,  $J = 8.3$  Hz, 2H), 7.45 (d,  $J = 7.9$  Hz, 1H), 7.37 (d,  $J = 7.7$  Hz, 2H), 7.27-7.24 (m, 2H), 7.22-7.18 (m, 3H), 7.14-7.10 (m, 3H), 6.91-6.89 (m, 2H), 5.20 (d,  $J = 5.9$  Hz, 1H), 4.84 (t,  $J = 8.7$  Hz, 1H), 4.28 (d,  $J = 16.6$  Hz, 1H), 4.17-4.12 (m, 2H), 3.83 (dq,  $J = 9.8, 7.1$  Hz, 1H), 3.67 (dq,  $J = 9.8, 7.1$  Hz, 1H), 2.58 (d,  $J = 16.6$  Hz, 1H), 2.35 (s, 3H), 2.26-2.21 (m, 1H), 2.00-1.95 (m, 1H), 1.23-1.17 (m, 4H);  $^{13}\text{C}$  NMR (125 MHz,  $\text{CDCl}_3$ )  $\delta$  143.1, 142.6, 142.1, 140.5, 139.2, 136.6, 135.3, 132.8, 130.6, 129.5, 128.4, 128.0, 127.6, 127.4, 127.2, 127.1, 126.6, 124.8, 110.6, 63.5, 58.1, 52.7, 52.0, 42.7, 38.2, 25.6, 21.4, 15.2; MS (MALDI) calcd. for  $\text{C}_{35}\text{H}_{35}\text{ClN}_2\text{O}_5\text{S}_2\text{Li}$   $[\text{M} + \text{Li}]^+$  669.18, found 669.26.

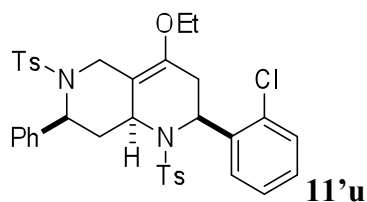

60% yield; white solid; IR (film)  $\nu_{\max}$  3063, 2979, 1699, 1348, 1163, 670  $\text{cm}^{-1}$ ;  $^1\text{H}$  NMR (500 MHz,  $\text{CDCl}_3$ )  $\delta$  7.62-7.58 (m, 4H), 7.36-7.25 (m, 8H), 7.19 (d,  $J = 8.1$  Hz, 2H), 7.16-7.11 (m, 3H), 5.48 (d,  $J = 4.7$  Hz, 1H), 4.90 (dd,  $J = 11.3, 6.4$  Hz, 1H), 4.75 (d,  $J = 16.9$  Hz, 1H), 3.76 (d,  $J = 11.5$  Hz, 1H), 3.45 (dq,  $J = 9.9, 7.1$  Hz, 1H), 3.34 (dq,  $J = 9.9, 7.1$  Hz, 1H), 2.94-2.89 (m, 1H), 2.50 (d,  $J = 16.1$  Hz, 1H), 2.42 (s, 3H), 2.39 (s, 3H), 1.94-1.83 (m, 2H), 0.97 (t,  $J = 7.1$  Hz, 3H);  $^{13}\text{C}$  NMR (125 MHz,  $\text{CDCl}_3$ )  $\delta$  143.8, 143.7, 143.1, 141.7, 138.4, 136.4, 135.8, 132.0, 129.7, 129.2, 128.8, 128.7, 128.4, 127.5, 127.3, 127.2, 126.5, 126.0, 110.1, 63.2, 58.2, 53.3, 52.5, 41.2, 38.6, 28.3, 21.5, 15.0; MS (MALDI) calcd. for  $\text{C}_{36}\text{H}_{37}\text{ClN}_2\text{O}_5\text{S}_2\text{Na}$   $[\text{M} + \text{Na}]^+$  699.17, found 699.38.

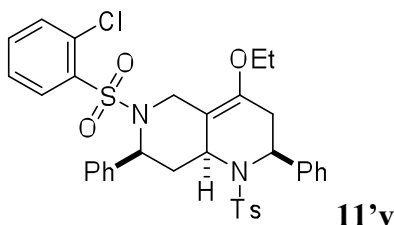

76% yield; white solid; IR (film)  $\nu_{\max}$  3059, 2980, 1697, 1341, 1162, 656  $\text{cm}^{-1}$ ;  $^1\text{H}$  NMR (500 MHz,  $\text{CDCl}_3$ )  $\delta$  7.73 (d,  $J = 8.2$  Hz, 2H), 7.46 (d,  $J = 7.8$  Hz, 2H), 7.37-7.26 (m, 7H), 7.21 (t,  $J = 7.3$  Hz, 1H), 7.00-6.94 (m, 2H), 6.85 (t,  $J = 7.6$  Hz, 2H), 6.68 (d,  $J = 7.6$  Hz, 2H), 5.35 (d,  $J = 6.0$  Hz, 1H), 4.74 (d,  $J = 15.5$  Hz, 1H), 4.65 (dd,  $J = 10.6, 5.9$  Hz, 1H), 4.42 (d,  $J = 11.9$  Hz, 1H), 4.03 (d,  $J = 15.6$  Hz, 1H), 3.86 (dq,  $J = 9.7, 7.1$  Hz, 1H), 3.69 (dq,  $J = 9.7, 7.1$  Hz, 1H), 2.61 (d,  $J = 16.7$  Hz, 1H), 2.45 (s, 3H), 2.14-2.04 (m, 2H), 1.28 (td,  $J = 12.5, 10.9$  Hz, 1H), 1.16 (t,  $J = 7.1$  Hz, 3H);  $^{13}\text{C}$  NMR (125 MHz,  $\text{CDCl}_3$ )  $\delta$  143.5, 143.1, 139.9, 138.6, 138.4, 137.5, 132.6, 131.7, 131.1, 131.0, 129.8, 128.3, 127.8, 127.6, 127.4, 127.2, 126.7, 126.3, 110.9, 63.5, 59.8, 52.6, 52.5, 43.6, 38.8, 25.4, 21.4, 15.0; MS (MALDI) calcd. for  $\text{C}_{35}\text{H}_{35}\text{ClN}_2\text{O}_5\text{S}_2\text{Na}$   $[\text{M} + \text{Na}]^+$  685.16, found 685.67.

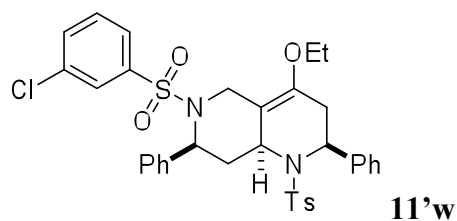

72% yield; white solid; IR (film)  $\nu_{\max}$  3063, 2979, 1701, 1351, 1164, 699  $\text{cm}^{-1}$ ;  $^1\text{H}$  NMR (500 MHz,  $\text{CDCl}_3$ )  $\delta$  7.61 (d,  $J = 8.2$  Hz, 2H), 7.44-7.42 (m, 3H), 7.37-7.24 (m, 7H), 7.18 (t,  $J = 7.2$  Hz, 1H), 7.13-7.08 (m, 3H), 6.88 (d,  $J = 7.1$  Hz, 2H), 5.23 (d,  $J = 5.6$  Hz, 1H), 4.79 (dd,  $J = 10.4$ , 7.3 Hz, 1H), 4.35 (d,  $J = 16.1$  Hz, 1H), 4.17-4.14 (m, 2H), 3.86 (dq,  $J = 9.7$ , 7.1 Hz, 1H), 3.69 (dq,  $J = 9.7$ , 7.1 Hz, 1H), 2.59 (d,  $J = 16.5$  Hz, 1H), 2.47 (s, 3H), 2.28-2.24 (m, 1H), 2.02-1.97 (m, 1H), 1.22-1.18 (m, 4H);  $^{13}\text{C}$  NMR (125 MHz,  $\text{CDCl}_3$ )  $\delta$  143.6, 143.0, 141.6, 139.8, 139.6, 137.3, 134.7, 132.1, 129.9, 128.3, 128.0, 127.5, 127.4, 127.3, 127.0, 126.8, 126.7, 125.0, 110.3, 63.4, 59.0, 52.6, 51.9, 42.9, 38.6, 25.7, 21.4, 15.2; MS (MALDI) calcd. for  $\text{C}_{35}\text{H}_{35}\text{ClN}_2\text{O}_5\text{S}_2\text{Na}$   $[\text{M} + \text{Na}]^+$  685.16, found 685.59.

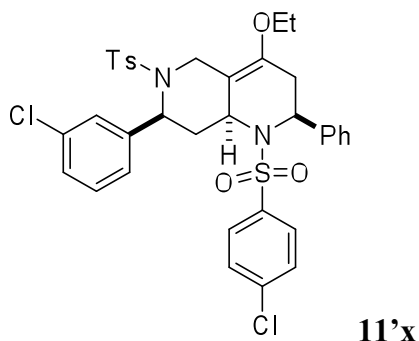

73% yield; white solid; IR (film)  $\nu_{\max}$  3063, 2979, 1699, 1347, 1163, 664  $\text{cm}^{-1}$ ;  $^1\text{H}$  NMR (500 MHz,  $\text{CDCl}_3$ )  $\delta$  7.64 (d,  $J = 8.6$  Hz, 2H), 7.48-7.46 (m, 4H), 7.35 (d,  $J = 7.6$  Hz, 2H), 7.26 (t,  $J = 7.5$  Hz, 2H), 7.22-7.19 (m, 3H), 7.08-7.03 (m, 2H), 6.82 (d,  $J = 7.2$  Hz, 1H), 6.74 (s, 1H), 5.22 (d,  $J = 5.8$  Hz, 1H), 4.74 (dd,  $J = 9.8$ , 7.6 Hz, 1H), 4.22 (d,  $J = 16.0$  Hz, 1H), 4.16-4.13 (m, 2H), 3.83 (dq,  $J = 9.7$ , 7.1 Hz, 1H), 3.67 (dq,  $J = 9.7$ , 7.1 Hz, 1H), 2.58 (d,  $J = 16.6$  Hz, 1H), 2.37 (s, 3H), 2.22-2.17 (m, 1H), 1.99-1.94 (m, 1H), 1.18 (t,  $J = 7.1$  Hz, 3H), 1.07 (td,  $J = 12.7$ , 10.2 Hz, 1H);  $^{13}\text{C}$  NMR (125 MHz,  $\text{CDCl}_3$ )  $\delta$  143.3, 142.9, 142.5, 139.3, 139.2, 138.8, 136.4, 133.8, 129.5, 129.4, 129.3, 128.4, 128.1, 127.7, 127.4, 127.3, 127.1, 126.7, 125.0, 110.0, 63.4, 57.8,

52.7, 51.8, 42.8, 38.4, 25.6, 21.4, 15.1; MS (MALDI) calcd. for  $C_{35}H_{34}Cl_2N_2O_5S_2Na$   $[M + Na]^+$  719.12, found 719.34.

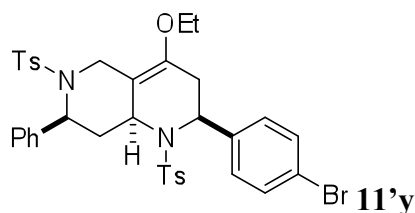

56% yield; white solid; IR (film)  $\nu_{max}$  3031, 2978, 1700, 1347, 1162, 657  $cm^{-1}$ ;  $^1H$  NMR (500 MHz,  $CDCl_3$ )  $\delta$  7.56 (d,  $J = 8.2$  Hz, 2H), 7.49 (d,  $J = 8.2$  Hz, 2H), 7.37 (d,  $J = 8.5$  Hz, 2H), 7.30 (d,  $J = 8.1$  Hz, 2H), 7.22-7.20 (m, 4H), 7.17-7.15 (m, 3H), 6.92-6.90 (m, 2H), 5.12 (d,  $J = 5.7$  Hz, 1H), 4.82 (dd,  $J = 9.8, 7.6$  Hz, 1H), 4.26 (d,  $J = 16.5$  Hz, 1H), 4.15 (d,  $J = 12.2$  Hz, 1H), 4.09 (d,  $J = 16.8$  Hz, 1H), 3.79 (dq,  $J = 9.8, 7.1$  Hz, 1H), 3.63 (dq,  $J = 9.8, 7.1$  Hz, 1H), 2.48-2.45 (m, 4H), 2.38 (s, 3H), 2.30-2.26 (m, 1H), 1.94-1.89 (m, 1H), 1.21-1.14 (m, 4H);  $^{13}C$  NMR (125 MHz,  $CDCl_3$ )  $\delta$  143.7, 143.0, 142.3, 140.6, 138.9, 137.1, 136.6, 131.4, 129.8, 129.4, 129.3, 128.1, 127.2, 127.1, 126.7, 126.5, 121.4, 110.9, 63.4, 58.2, 52.2, 51.8, 42.6, 38.8, 25.5, 21.5, 21.4, 15.1; MS (MALDI) calcd. for  $C_{36}H_{37}BrN_2O_5S_2Na$   $[M + Na]^+$  745.12, found 745.31.

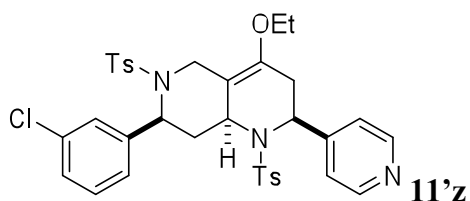

80% yield; white solid; IR (film)  $\nu_{max}$  3031, 2979, 2925, 1700, 1346, 1162, 656  $cm^{-1}$ ;  $^1H$  NMR (500 MHz,  $CDCl_3$ )  $\delta$  8.47 (d,  $J = 5.7$  Hz, 2H), 7.55 (d,  $J = 8.2$  Hz, 2H), 7.46 (d,  $J = 8.2$  Hz, 2H), 7.29 (d,  $J = 8.0$  Hz, 2H), 7.24 (d,  $J = 5.7$  Hz, 2H), 7.08-7.02 (m, 2H), 6.82-6.80 (m, 2H), 5.07 (d,  $J = 5.3$  Hz, 1H), 4.81 (dd,  $J = 10.5, 7.3$  Hz, 1H), 4.41 (d,  $J = 17.0$  Hz, 1H), 4.09 (d,  $J = 11.8$  Hz, 1H), 3.98 (d,  $J = 17.2$  Hz, 1H), 3.79 (dq,  $J = 9.7, 7.1$  Hz, 1H), 3.62 (dq,  $J = 9.7, 7.1$  Hz, 1H), 2.50 (d,  $J = 16.5$  Hz, 1H), 2.42 (s, 3H), 2.38-2.35 (m, 4H), 1.88-1.84 (m, 1H), 1.17-1.10 (m, 4H);  $^{13}C$  NMR (125 MHz,  $CDCl_3$ )  $\delta$  149.9, 149.0, 144.0, 143.3, 142.6, 142.3, 136.6, 136.5, 134.0, 130.0, 129.6, 129.4, 127.4, 127.0, 126.8, 126.3, 124.4, 122.2, 110.7, 63.5, 57.7, 52.1, 51.9, 42.4, 39.1, 25.2, 21.5, 21.4, 15.1; MS (MALDI) calcd. for  $C_{35}H_{36}ClN_3O_5S_2Na$   $[M + Na]^+$  700.17, found 701.25.



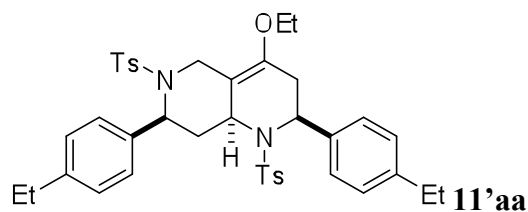

70% yield; white solid; IR (film)  $\nu_{\max}$  2965, 2925, 1702, 1346, 1162, 655  $\text{cm}^{-1}$ ;  $^1\text{H}$  NMR (500 MHz,  $\text{CDCl}_3$ )  $\delta$  7.57 (d,  $J = 8.2$  Hz, 2H), 7.48 (d,  $J = 8.2$  Hz, 2H), 7.30-7.27 (m, 4H), 7.19 (d,  $J = 8.0$  Hz, 2H), 7.09 (d,  $J = 8.2$  Hz, 2H), 6.93 (d,  $J = 8.2$  Hz, 2H), 6.82 (d,  $J = 8.2$  Hz, 2H), 5.18 (d,  $J = 5.8$  Hz, 1H), 4.76 (dd,  $J = 9.8, 7.6$  Hz, 1H), 4.24-4.15 (m, 3H), 3.82 (dq,  $J = 9.8, 7.1$  Hz, 1H), 3.65 (dq,  $J = 9.8, 7.1$  Hz, 1H), 2.61-2.51 (m, 5H), 2.44 (s, 3H), 2.37 (s, 3H), 2.23-2.17 (m, 1H), 1.96-1.90 (m, 1H), 1.20-1.15 (m, 10H);  $^{13}\text{C}$  NMR (125 MHz,  $\text{CDCl}_3$ )  $\delta$  143.5, 143.4, 143.1, 142.8, 142.7, 137.9, 137.6, 136.9, 136.8, 129.8, 129.3, 127.7, 127.5, 127.4, 127.2, 126.8, 126.7, 110.8, 63.4, 58.4, 52.4, 51.8, 42.8, 38.5, 28.3, 25.6, 21.5, 21.4, 15.5, 15.4, 15.1; MS (MALDI) calcd. for  $\text{C}_{40}\text{H}_{46}\text{N}_2\text{O}_5\text{S}_2\text{Na}$   $[\text{M} + \text{Na}]^+$  721.27, found 721.18.

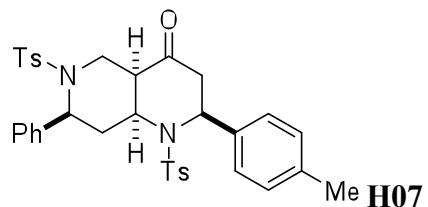

89% yield; white solid; IR (film)  $\nu_{\max}$  3031, 2919, 2868, 1713, 1347, 1162, 659  $\text{cm}^{-1}$ ;  $^1\text{H}$  NMR (500 MHz,  $\text{CDCl}_3$ )  $\delta$  7.76 (d,  $J = 8.2$  Hz, 2H), 7.46 (d,  $J = 7.9$  Hz, 2H), 7.38 (d,  $J = 8.0$  Hz, 2H), 7.24 (d,  $J = 8.2$  Hz, 2H), 7.18 (d,  $J = 8.1$  Hz, 2H), 7.13-7.10 (m, 3H), 7.02 (d,  $J = 8.0$  Hz, 2H), 6.86 (dd,  $J = 7.5, 1.0$  Hz, 2H), 5.67 (d,  $J = 6.6$  Hz, 1H), 4.91 (dd,  $J = 11.3, 7.0$  Hz, 1H), 4.60-4.56 (m, 1H), 3.80 (dd,  $J = 15.4, 8.0$  Hz, 1H), 3.43 (dd,  $J = 15.4, 9.3$  Hz, 1H), 2.92 (dd,  $J = 14.8, 1.9$  Hz, 1H), 2.67 (dd,  $J = 17.5, 8.8$  Hz, 1H), 2.48 (s, 3H), 2.38 (s, 3H), 2.23-2.19 (m, 4H), 1.79-1.74 (m, 1H), 0.99 (td,  $J = 13.5, 11.5$  Hz, 1H);  $^{13}\text{C}$  NMR (125 MHz,  $\text{CDCl}_3$ )  $\delta$  206.7, 144.1, 143.2, 140.2, 137.8, 137.4, 137.1, 136.3, 130.3, 129.4, 129.1, 128.2, 127.3, 127.2, 127.0, 126.6, 125.9, 58.5, 54.9, 53.2, 45.4, 41.5, 40.5, 36.2, 21.5, 21.4, 20.8; MS (MALDI) calcd. for  $\text{C}_{35}\text{H}_{36}\text{N}_2\text{O}_5\text{S}_2\text{Na}$   $[\text{M} + \text{Na}]^+$  651.20, found 651.52.

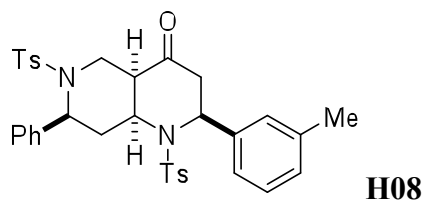

92% yield; white solid; IR (film)  $\nu_{\max}$  3060, 2922, 1713, 1347, 1162, 660  $\text{cm}^{-1}$ ;  $^1\text{H}$  NMR (500 MHz,  $\text{CDCl}_3$ )  $\delta$  7.77 (d,  $J = 8.0$  Hz, 2H), 7.44 (d,  $J = 8.1$  Hz, 2H), 7.38 (d,  $J = 8.1$  Hz, 2H), 7.20-7.08 (m, 8H), 6.96 (d,  $J = 7.2$  Hz, 1H), 6.86 (d,  $J = 7.0$  Hz, 2H), 5.67 (d,  $J = 6.7$  Hz, 1H), 4.91 (dd,  $J = 11.3, 7.0$  Hz, 1H), 4.62-4.58 (m, 1H), 3.79 (dd,  $J = 15.4, 8.0$  Hz, 1H), 3.47 (dd,  $J = 15.4, 9.1$  Hz, 1H), 2.93 (dd,  $J = 14.8, 1.4$  Hz, 1H), 2.67 (dd,  $J = 17.5, 8.7$  Hz, 1H), 2.48 (s, 3H), 2.37 (s, 3H), 2.24-2.20 (m, 4H), 1.79-1.74 (m, 1H), 1.04 (td,  $J = 12.5, 11.6$  Hz, 1H);  $^{13}\text{C}$  NMR (125 MHz,  $\text{CDCl}_3$ )  $\delta$  206.6, 144.1, 143.2, 140.2, 139.4, 138.2, 137.4, 137.1, 130.3, 129.4, 128.7, 128.3, 128.2, 128.1, 127.3, 127.0, 126.6, 125.9, 124.2, 58.5, 55.1, 53.3, 45.4, 41.4, 40.5, 36.2, 21.5, 21.4, 21.3; MS (MALDI) calcd. for  $\text{C}_{35}\text{H}_{36}\text{N}_2\text{O}_5\text{S}_2\text{Na}$   $[\text{M} + \text{Na}]^+$  651.20, found 651.57.

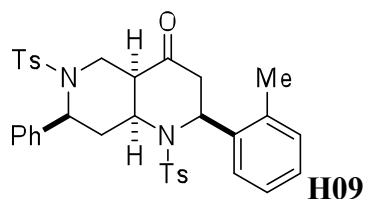

83% yield; white solid; IR (film)  $\nu_{\max}$  3060, 2959, 1722, 1350, 1162, 660  $\text{cm}^{-1}$ ;  $^1\text{H}$  NMR (500 MHz,  $\text{CDCl}_3$ )  $\delta$  7.76 (d,  $J = 8.0$  Hz, 2H), 7.36-7.34 (m, 4H), 7.14-7.08 (m, 7H), 7.03-7.01 (m, 2H), 6.85-6.83 (m, 2H), 5.81 (t,  $J = 5.5$  Hz, 1H), 4.77 (dd,  $J = 11.4, 6.5$  Hz, 1H), 4.53-4.48 (m, 1H), 3.78 (dd,  $J = 14.8, 7.5$  Hz, 1H), 3.47 (dd,  $J = 14.8, 8.9$  Hz, 1H), 2.88 (dd,  $J = 16.2, 4.7$  Hz, 1H), 2.72-2.66 (m, 2H), 2.53 (s, 3H), 2.47 (s, 3H), 2.36 (s, 3H), 1.78-1.73 (m, 1H), 1.27 (td,  $J = 13.5, 11.6$  Hz, 1H);  $^{13}\text{C}$  NMR (125 MHz,  $\text{CDCl}_3$ )  $\delta$  207.2, 144.4, 143.2, 140.0, 138.2, 137.3, 136.7, 136.3, 131.2, 129.3, 128.2, 128.1, 127.5, 127.4, 127.1, 126.3, 126.2, 126.0, 58.9, 53.9, 52.5, 45.2, 43.5, 41.8, 36.0, 21.5, 21.4, 20.2; MS (MALDI) calcd. for  $\text{C}_{35}\text{H}_{36}\text{N}_2\text{O}_5\text{S}_2\text{Na}$   $[\text{M} + \text{Na}]^+$  651.20, found 651.78.

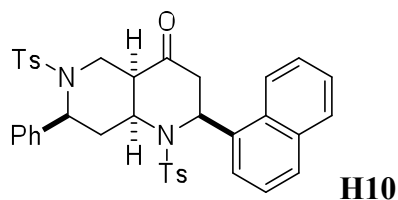

85% yield; white solid; IR (film)  $\nu_{\max}$  3060, 2951, 2923, 1704, 1352, 1161, 661  $\text{cm}^{-1}$ ;  $^1\text{H}$  NMR (500 MHz,  $\text{CDCl}_3$ )  $\delta$  8.71 (d,  $J = 8.6$  Hz, 1H), 7.87 (d,  $J = 8.3$  Hz, 2H), 7.78 (d,  $J = 7.7$  Hz, 1H), 7.71 (d,  $J = 7.7$  Hz, 1H), 7.65-7.62 (m, 1H), 7.51 (t,  $J = 7.5$  Hz, 1H), 7.37-7.24 (m, 6H), 7.12-7.08 (m, 3H), 7.05-7.02 (m, 2H), 6.69 (d,  $J = 7.2$  Hz, 2H), 6.55 (dd,  $J = 6.7, 2.5$  Hz, 1H), 4.53 (dd,  $J = 11.3, 6.8$  Hz, 1H), 4.33-4.28 (m, 1H), 3.90 (dd,  $J = 15.1, 7.8$  Hz, 1H), 3.42 (dd,  $J = 15.1, 9.3$  Hz, 1H), 3.11 (dd,  $J = 15.9, 2.9$  Hz, 1H), 2.98 (dd,  $J = 16.0, 7.1$  Hz, 1H), 2.48 (s, 3H), 2.37 (s, 3H), 1.17-1.13 (m, 1H), 1.03 (td,  $J = 13.5, 11.6$  Hz, 1H);  $^{13}\text{C}$  NMR (125 MHz,  $\text{CDCl}_3$ )  $\delta$  207.9, 144.6, 143.2, 139.9, 136.8, 136.0, 135.8, 133.8, 131.4, 130.2, 130.0, 129.3, 128.7, 128.1, 127.7, 127.4, 127.0, 126.7, 126.2, 126.0, 125.0, 124.4, 124.3, 58.5, 52.8, 52.7, 45.2, 43.8, 41.4, 34.5, 21.6, 21.4; MS (MALDI) calcd. for  $\text{C}_{38}\text{H}_{36}\text{N}_2\text{O}_5\text{S}_2\text{Na}$   $[\text{M} + \text{Na}]^+$  687.20, found 688.43.

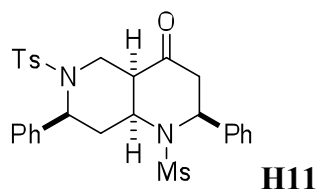

80% yield; white solid; IR (film)  $\nu_{\max}$  3062, 2928, 1713, 1344, 1157, 661  $\text{cm}^{-1}$ ;  $^1\text{H}$  NMR (500 MHz,  $\text{CDCl}_3$ )  $\delta$  7.47 (d,  $J = 8.0$  Hz, 2H), 7.35 (d,  $J = 7.4$  Hz, 2H), 7.24-7.11 (m, 8H), 6.90 (d,  $J = 6.2$  Hz, 2H), 5.69 (d,  $J = 5.9$  Hz, 1H), 4.83 (dd,  $J = 10.8, 7.2$  Hz, 1H), 4.17 (t,  $J = 10.7$  Hz, 1H), 3.95 (dd,  $J = 15.3, 7.9$  Hz, 1H), 3.56 (dd,  $J = 15.3, 9.1$  Hz, 1H), 3.17 (d,  $J = 15.0$  Hz, 1H), 3.01 (dd,  $J = 17.1, 8.5$  Hz, 1H), 2.93 (s, 3H), 2.81 (dd,  $J = 14.9, 7.0$  Hz, 1H), 2.37 (s, 3H), 1.78-1.74 (m, 1H), 1.01 (td,  $J = 12.5, 11.9$  Hz, 1H);  $^{13}\text{C}$  NMR (125 MHz,  $\text{CDCl}_3$ )  $\delta$  206.2, 143.4, 140.0, 139.4, 136.9, 129.6, 128.6, 128.3, 128.1, 127.4, 127.3, 127.0, 125.8, 58.5, 55.0, 52.9, 45.9, 42.8, 40.7, 40.1, 36.1, 21.4; MS (MALDI) calcd. for  $\text{C}_{28}\text{H}_{30}\text{N}_2\text{O}_5\text{S}_2\text{Na}$   $[\text{M} + \text{Na}]^+$  561.15, found 561.52.

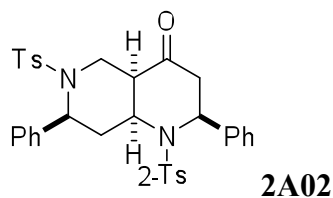

90% yield; white solid; IR (film)  $\nu_{\max}$  3062, 2975, 1713, 1346, 1162, 735  $\text{cm}^{-1}$ ;  $^1\text{H}$  NMR (500 MHz,  $\text{CDCl}_3$ )  $\delta$  8.05 (d,  $J = 7.6$  Hz, 1H), 7.54 (t,  $J = 7.3$  Hz, 1H), 7.42-7.36 (m, 4H), 7.26-7.24 (m, 2H), 7.19-7.16 (m, 2H), 7.14-7.06 (m, 6H), 6.83 (d,  $J = 7.2$  Hz, 2H), 5.62 (d,  $J = 6.5$  Hz, 1H), 4.81 (dd,  $J = 11.3, 6.8$  Hz, 1H), 4.61-4.57 (m, 1H), 3.81 (dd,  $J = 15.2, 7.9$  Hz, 1H), 3.55 (dd,  $J = 15.2, 8.8$  Hz, 1H), 3.07 (dd,  $J = 14.9, 1.4$  Hz, 1H), 2.92 (dd,  $J = 17.0, 8.5$  Hz, 1H), 2.73 (s, 3H), 2.33 (s, 3H), 1.73-1.70 (m, 1H), 1.03 (td,  $J = 12.6, 11.7$  Hz, 1H);  $^{13}\text{C}$  NMR (125 MHz,  $\text{CDCl}_3$ )  $\delta$  206.8, 143.2, 140.0, 139.4, 137.2, 137.1, 136.9, 133.4, 133.2, 130.1, 129.4, 128.5, 128.2, 128.1, 127.4, 127.3, 126.9, 126.8, 126.0, 58.8, 55.0, 52.7, 46.4, 42.3, 40.8, 36.1, 21.4, 21.0; MS (MALDI) calcd. for  $\text{C}_{34}\text{H}_{34}\text{N}_2\text{O}_5\text{S}_2\text{Na}$   $[\text{M} + \text{Na}]^+$  637.18, found 637.48.

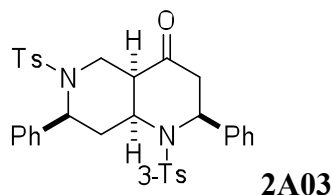

85% yield; white solid; IR (film)  $\nu_{\max}$  3063, 2923, 1713, 1347, 1158, 661  $\text{cm}^{-1}$ ;  $^1\text{H}$  NMR (500 MHz,  $\text{CDCl}_3$ )  $\delta$  7.84 (s, 1H), 7.69-7.67 (m, 1H), 7.48-7.47 (m, 2H), 7.42-7.36 (m, 4H), 7.24-7.21 (m, 2H), 7.18-7.14 (m, 3H), 7.11-7.06 (m, 3H), 6.82-6.81 (m, 2H), 5.75 (d,  $J = 6.7$  Hz, 1H), 4.96 (dd,  $J = 11.2, 7.1$  Hz, 1H), 4.69-4.65 (m, 1H), 3.76 (dd,  $J = 15.3, 8.0$  Hz, 1H), 3.41 (dd,  $J = 15.3, 9.2$  Hz, 1H), 2.97 (dd,  $J = 14.8, 1.9$  Hz, 1H), 2.69 (dd,  $J = 17.5, 8.9$  Hz, 1H), 2.50 (s, 3H), 2.36 (s, 3H), 2.29 (dd,  $J = 14.5, 7.2$  Hz, 1H), 1.80-1.76 (m, 1H), 0.97 (td,  $J = 13.5, 11.4$  Hz, 1H);  $^{13}\text{C}$  NMR (125 MHz,  $\text{CDCl}_3$ )  $\delta$  206.6, 143.2, 140.2, 140.0, 139.4, 136.9, 134.0, 129.5, 129.4, 128.5, 128.2, 128.0, 127.3, 127.2, 127.1, 125.6, 123.5, 58.2, 55.2, 53.3, 45.6, 41.4, 40.4, 36.1, 21.4, 21.3; MS (MALDI) calcd. for  $\text{C}_{34}\text{H}_{34}\text{N}_2\text{O}_5\text{S}_2\text{Na}$   $[\text{M} + \text{Na}]^+$  637.18, found 637.64.

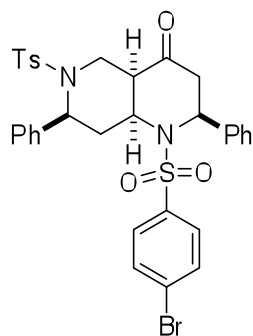

**2A04**

90% yield; white solid; IR (film)  $\nu_{\max}$  3062, 2917, 1713, 1348, 1164, 661  $\text{cm}^{-1}$ ;  $^1\text{H}$  NMR (500 MHz,  $\text{CDCl}_3$ )  $\delta$  7.81-7.74 (m, 4H), 7.44-7.37 (m, 4H), 7.26-7.08 (m, 8H), 6.83 (d,  $J = 6.3$  Hz, 2H), 5.74 (d,  $J = 6.3$  Hz, 1H), 4.96 (t,  $J = 8.8$  Hz, 1H), 4.62 (t,  $J = 11.0$  Hz, 1H), 3.77 (dd,  $J = 14.8, 7.5$  Hz, 1H), 3.41 (dd,  $J = 13.4, 10.1$  Hz, 1H), 3.01 (d,  $J = 14.9$  Hz, 1H), 2.72 (dd,  $J = 15.9, 7.5$  Hz, 1H), 2.37 (s, 3H), 2.28 (dd,  $J = 16.4, 10.7$  Hz, 1H), 1.80-1.76 (m, 1H), 0.97 (td,  $J = 12.2, 11.1$  Hz, 1H);  $^{13}\text{C}$  NMR (125 MHz,  $\text{CDCl}_3$ )  $\delta$  206.1, 143.3, 140.0, 139.4, 139.0, 136.8, 133.0, 129.4, 128.6, 128.3, 128.2, 128.1, 127.4, 127.3, 127.1, 58.1, 55.3, 53.4, 45.6, 41.6, 40.3, 36.0, 21.4; MS (MALDI) calcd. for  $\text{C}_{33}\text{H}_{31}\text{BrN}_2\text{O}_5\text{S}_2\text{Na}$   $[\text{M} + \text{Na}]^+$  703.07, found 703.63.

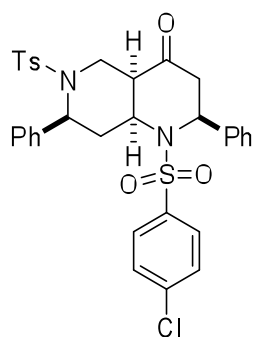

**2A05**

88% yield; white solid; IR (film)  $\nu_{\max}$  3062, 2923, 2865, 1725, 1334, 1162, 667  $\text{cm}^{-1}$ ;  $^1\text{H}$  NMR (500 MHz,  $\text{CDCl}_3$ )  $\delta$  7.88 (d,  $J = 8.6$  Hz, 2H), 7.59 (d,  $J = 8.6$  Hz, 2H), 7.44 (d,  $J = 8.3$  Hz, 2H), 7.38 (d,  $J = 8.0$  Hz, 2H), 7.24 (t,  $J = 8.3$  Hz, 2H), 7.19-7.16 (m, 3H), 7.13-7.08 (m, 3H), 6.83-6.82 (m, 2H), 5.75 (d,  $J = 6.6$  Hz, 1H), 4.96 (dd,  $J = 11.1, 7.2$  Hz, 1H), 4.63 (t,  $J = 10.5$  Hz, 1H), 3.77 (dd,  $J = 15.5, 8.1$  Hz, 1H), 3.41 (dd,  $J = 15.5, 9.2$  Hz, 1H), 3.01 (dd,  $J = 14.9, 2.0$  Hz, 1H), 2.72 (dd,  $J = 17.6, 8.8$  Hz, 1H), 2.37 (s, 3H), 2.31 (dd,  $J = 14.7, 7.1$  Hz, 1H), 1.80-1.76 (m, 1H), 0.97 (td,  $J = 13.5, 11.5$  Hz, 1H);  $^{13}\text{C}$  NMR (125 MHz,  $\text{CDCl}_3$ )  $\delta$  203.4, 142.9, 140.8, 139.8, 138.0, 137.4, 135.3, 129.8, 129.0, 128.6, 128.5, 127.8, 127.5, 127.4, 127.0, 126.5, 55.6, 55.2,

51.6, 46.5, 42.4, 37.7, 33.0, 21.6; MS (MALDI) calcd. for C<sub>33</sub>H<sub>31</sub>ClN<sub>2</sub>O<sub>5</sub>S<sub>2</sub>Na [M + Na]<sup>+</sup> 657.12, found 657.69.

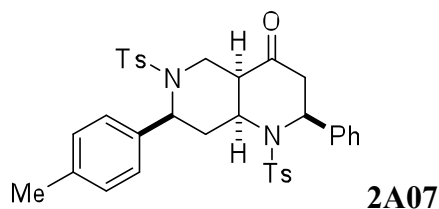

89% yield; white solid; IR (film)  $\nu_{\max}$  3029, 2922, 2864, 1712, 1347, 1162, 660 cm<sup>-1</sup>; <sup>1</sup>H NMR (500 MHz, CDCl<sub>3</sub>)  $\delta$  7.76 (d, *J* = 8.2 Hz, 2H), 7.44 (d, *J* = 8.2 Hz, 2H), 7.39-7.37 (m, 4H), 7.24-7.21 (m, 2H), 7.18-7.15 (m, 3H), 6.89 (d, *J* = 7.8 Hz, 1H), 6.73 (d, *J* = 8.0 Hz, 2H), 5.71 (d, *J* = 6.5 Hz, 1H), 4.87 (dd, *J* = 11.1, 7.0 Hz, 1H), 4.61-4.56 (m, 1H), 3.77 (dd, *J* = 15.4, 8.0 Hz, 1H), 3.44 (dd, *J* = 15.3, 9.1 Hz, 1H), 2.94 (d, *J* = 14.8 Hz, 1H), 2.67 (dd, *J* = 17.4, 8.7 Hz, 1H), 2.48 (s, 3H), 2.38 (s, 3H), 2.25-2.21 (m, 4H), 1.76-1.72 (m, 1H), 0.98 (td, *J* = 12.5, 11.6 Hz, 1H); <sup>13</sup>C NMR (125 MHz, CDCl<sub>3</sub>)  $\delta$  206.6, 144.2, 143.2, 139.4, 137.4, 137.2, 137.0, 130.3, 129.4, 128.8, 128.5, 128.0, 127.3, 127.0, 126.6, 125.8, 58.3, 55.2, 53.4, 45.5, 41.4, 40.4, 36.3, 21.6, 21.4, 20.9; MS (MALDI) calcd. for C<sub>35</sub>H<sub>36</sub>N<sub>2</sub>O<sub>5</sub>S<sub>2</sub>Na [M + Na]<sup>+</sup> 651.20, found 651.56.

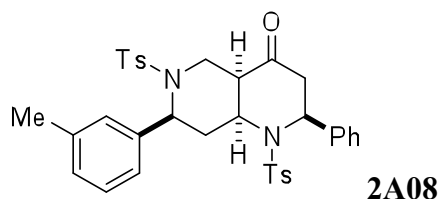

88% yield; white solid; IR (film)  $\nu_{\max}$  3061, 2922, 2864, 1713, 1348, 1162, 660 cm<sup>-1</sup>; <sup>1</sup>H NMR (500 MHz, CDCl<sub>3</sub>)  $\delta$  7.79 (d, *J* = 7.9 Hz, 2H), 7.43 (d, *J* = 8.0 Hz, 2H), 7.40-7.38 (m, 4H), 7.25-7.22 (m, 2H), 7.17-7.16 (m, 3H), 6.98 (t, *J* = 7.5 Hz, 1H), 6.91 (d, *J* = 7.4 Hz, 1H), 6.65 (d, *J* = 7.4 Hz, 1H), 6.51 (s, 1H), 5.73 (d, *J* = 6.5 Hz, 1H), 4.84 (dd, *J* = 11.2, 6.9 Hz, 1H), 4.63-4.58 (m, 1H), 3.79 (dd, *J* = 15.3, 7.9 Hz, 1H), 3.47 (dd, *J* = 15.2, 9.1 Hz, 1H), 2.96 (d, *J* = 14.8 Hz, 1H), 2.68 (dd, *J* = 17.4, 8.7 Hz, 1H), 2.48 (s, 3H), 2.37 (s, 3H), 2.28-2.22 (m, 1H), 2.11 (s, 3H), 1.76-1.72 (m, 1H), 0.97 (td, *J* = 13.0, 12.7 Hz, 1H); <sup>13</sup>C NMR (125 MHz, CDCl<sub>3</sub>)  $\delta$  206.6, 144.2, 143.1, 139.9, 139.5, 137.7, 137.4, 137.2, 130.3, 129.3, 128.5, 128.1, 128.0, 127.9, 127.3, 127.0, 126.7, 126.6, 123.2, 58.6, 55.2, 53.4, 45.6, 41.4, 40.6, 36.4, 21.5, 21.4, 21.1; MS (MALDI) calcd. for C<sub>35</sub>H<sub>36</sub>N<sub>2</sub>O<sub>5</sub>S<sub>2</sub>Na [M + Na]<sup>+</sup> 651.20, found 651.84.

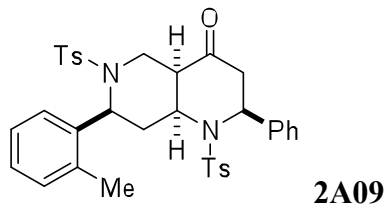

91% yield; white solid; IR (film)  $\nu_{\max}$  3058, 2953, 2914, 1713, 1362, 1162, 660  $\text{cm}^{-1}$ ;  $^1\text{H}$  NMR (500 MHz,  $\text{CDCl}_3$ )  $\delta$  7.80 (d,  $J = 8.2$  Hz, 2H), 7.39 (d,  $J = 8.0$  Hz, 2H), 7.36-7.33 (m, 4H), 7.19 (t,  $J = 7.6$  Hz, 2H), 7.13-7.10 (m, 3H), 7.00-6.95 (m, 2H), 6.80 (t,  $J = 7.2$  Hz, 1H), 6.66 (d,  $J = 7.7$  Hz, 1H), 5.72 (d,  $J = 6.2$  Hz, 1H), 5.01 (dd,  $J = 11.7, 6.2$  Hz, 1H), 4.62-4.57 (m, 1H), 3.90 (dd,  $J = 15.2, 7.8$  Hz, 1H), 3.58 (dd,  $J = 15.3, 9.2$  Hz, 1H), 2.96 (dd,  $J = 14.9, 2.2$  Hz, 1H), 2.76 (dd,  $J = 17.4, 8.8$  Hz, 1H), 2.48 (s, 3H), 2.35 (s, 3H), 2.29 (dd,  $J = 14.7, 7.2$  Hz, 1H), 2.21 (s, 3H), 1.68-1.64 (m, 1H), 0.90 (td,  $J = 12.7, 12.0$  Hz, 1H);  $^{13}\text{C}$  NMR (125 MHz,  $\text{CDCl}_3$ )  $\delta$  206.5, 144.2, 143.1, 139.3, 138.8, 137.3, 136.9, 134.3, 130.3, 130.2, 129.3, 128.5, 128.0, 127.2, 127.1, 127.0, 126.7, 125.9, 125.1, 56.0, 55.1, 53.6, 45.8, 41.6, 41.5, 36.2, 21.5, 21.4, 19.0; MS (MALDI) calcd. for  $\text{C}_{35}\text{H}_{36}\text{N}_2\text{O}_5\text{S}_2\text{Na}$   $[\text{M} + \text{Na}]^+$  651.20, found 651.84.

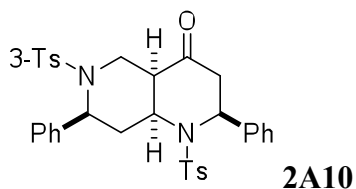

90% yield; white solid; IR (film)  $\nu_{\max}$  3062, 2921, 1713, 1347, 1162, 699  $\text{cm}^{-1}$ ;  $^1\text{H}$  NMR (500 MHz,  $\text{CDCl}_3$ )  $\delta$  7.78 (d,  $J = 8.2$  Hz, 2H), 7.39-7.38 (m, 5H), 7.29-7.21 (m, 5H), 7.16 (t,  $J = 7.3$  Hz, 1H), 7.11-7.06 (m, 3H), 6.84-6.82 (m, 2H), 5.73 (d,  $J = 6.7$  Hz, 1H), 4.93 (dd,  $J = 11.3, 7.0$  Hz, 1H), 4.65-4.60 (m, 1H), 3.82 (dd,  $J = 15.2, 8.0$  Hz, 1H), 3.46 (dd,  $J = 15.3, 9.2$  Hz, 1H), 2.96 (dd,  $J = 14.8, 2.0$  Hz, 1H), 2.68 (dd,  $J = 17.5, 8.9$  Hz, 1H), 2.49 (s, 3H), 2.28-2.23 (m, 4H), 1.79-1.74 (m, 1H), 0.98 (td,  $J = 13.5, 11.5$  Hz, 1H);  $^{13}\text{C}$  NMR (125 MHz,  $\text{CDCl}_3$ )  $\delta$  206.6, 144.2, 140.0, 139.9, 139.4, 139.1, 137.4, 133.1, 130.3, 128.6, 128.5, 128.1, 128.0, 127.40, 127.39, 127.3, 126.6, 125.9, 124.0, 58.7, 55.1, 53.3, 45.6, 41.4, 40.5, 36.4, 21.5, 21.1; MS (MALDI) calcd. for  $\text{C}_{34}\text{H}_{34}\text{N}_2\text{O}_5\text{S}_2\text{Na}$   $[\text{M} + \text{Na}]^+$  637.18, found 637.52.

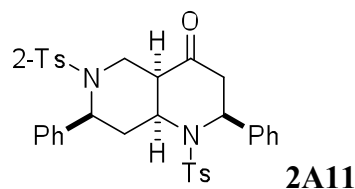

90% yield; white solid; IR (film)  $\nu_{\max}$  3062, 2921, 1713, 1309, 1162, 699  $\text{cm}^{-1}$ ;  $^1\text{H}$  NMR (500 MHz,  $\text{CDCl}_3$ )  $\delta$  7.93 (d,  $J = 8.2$  Hz, 2H), 7.66 (dd,  $J = 7.9, 0.9$  Hz, 1H), 7.44-7.41 (m, 4H), 7.31-7.23 (m, 3H), 7.16 (t,  $J = 7.3$  Hz, 1H), 7.10 (t,  $J = 7.6$  Hz, 1H), 7.05-7.01 (m, 2H), 6.95-6.92 (m, 2H), 6.62 (d,  $J = 7.3$  Hz, 2H), 5.82 (d,  $J = 6.5$  Hz, 1H), 4.89-4.84 (m, 1H), 4.70 (dd,  $J = 11.2, 6.5$  Hz, 1H), 3.75 (dd,  $J = 15.2, 7.5$  Hz, 1H), 3.66 (dd,  $J = 15.2, 8.3$  Hz, 1H), 3.02 (dd,  $J = 14.8, 2.2$  Hz, 1H), 2.71 (dd,  $J = 16.4, 8.1$  Hz, 1H), 2.48 (s, 3H), 2.39 (dd,  $J = 14.3, 7.2$  Hz, 1H), 2.28 (s, 3H), 1.73-1.68 (m, 1H), 1.08 (td,  $J = 13.4, 11.4$  Hz, 1H);  $^{13}\text{C}$  NMR (125 MHz,  $\text{CDCl}_3$ )  $\delta$  206.5, 144.2, 139.8, 138.0, 137.3, 137.2, 132.6, 132.2, 130.4, 129.9, 128.5, 128.0, 127.9, 127.3, 126.8, 126.1, 125.8, 58.8, 55.5, 53.6, 46.0, 41.6, 40.4, 36.0, 21.5, 19.8; MS (MALDI) calcd. for  $\text{C}_{34}\text{H}_{34}\text{N}_2\text{O}_5\text{S}_2\text{Na}$   $[\text{M} + \text{Na}]^+$  637.18, found 637.50.

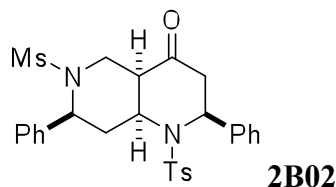

87% yield; white solid; IR (film)  $\nu_{\max}$  3062, 3027, 2925, 1713, 1333, 1163, 670  $\text{cm}^{-1}$ ;  $^1\text{H}$  NMR (500 MHz,  $\text{CDCl}_3$ )  $\delta$  7.91 (d,  $J = 8.2$  Hz, 2H), 7.43-7.39 (m, 4H), 7.26-7.16 (m, 6H), 7.00-6.98 (m, 2H), 5.83 (d,  $J = 6.7$  Hz, 1H), 4.87 (dd,  $J = 11.2, 7.1$  Hz, 1H), 4.75-4.71 (m, 1H), 3.80 (dd,  $J = 15.0, 8.2$  Hz, 1H), 3.48 (dd,  $J = 14.9, 9.2$  Hz, 1H), 3.03 (dd,  $J = 14.8, 1.7$  Hz, 1H), 2.75 (dd,  $J = 17.6, 8.8$  Hz, 1H), 2.46 (s, 3H), 2.43-2.39 (m, 4H), 1.80-1.74 (m, 1H), 1.04 (td,  $J = 13.3, 11.5$  Hz, 1H);  $^{13}\text{C}$  NMR (125 MHz,  $\text{CDCl}_3$ )  $\delta$  206.6, 144.3, 139.6, 139.5, 137.2, 130.4, 128.7, 128.5, 128.1, 128.0, 127.4, 126.7, 126.0, 58.2, 55.2, 53.2, 46.2, 41.6, 40.4, 40.3, 36.7, 21.5; MS (MALDI) calcd. for  $\text{C}_{28}\text{H}_{30}\text{N}_2\text{O}_5\text{S}_2\text{Na}$   $[\text{M} + \text{Na}]^+$  561.15, found 561.45.



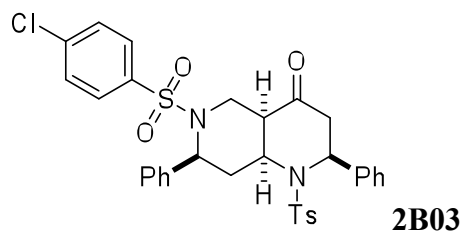

90% yield; white solid; IR (film)  $\nu_{\max}$  3063, 2917, 1713, 1349, 1163, 699  $\text{cm}^{-1}$ ;  $^1\text{H}$  NMR (500 MHz,  $\text{CDCl}_3$ )  $\delta$  7.82 (d,  $J = 8.0$  Hz, 2H), 7.41-7.36 (m, 6H), 7.28-7.20 (m, 4H), 7.17-7.10 (m, 2H), 7.07-7.02 (m, 2H), 6.78 (d,  $J = 7.8$  Hz, 2H), 5.75 (d,  $J = 6.5$  Hz, 1H), 4.85 (dd,  $J = 11.4, 6.7$  Hz, 1H), 4.65-4.60 (m, 1H), 3.78 (dd,  $J = 15.1, 7.8$  Hz, 1H), 3.52 (dd,  $J = 15.1, 9.0$  Hz, 1H), 2.99 (d,  $J = 14.9$  Hz, 1H), 2.70 (dd,  $J = 17.1, 8.6$  Hz, 1H), 2.47 (s, 3H), 2.31 (dd,  $J = 14.9, 7.1$  Hz, 1H), 1.76-1.72 (m, 1H), 1.00 (td,  $J = 12.6, 11.8$  Hz, 1H);  $^{13}\text{C}$  NMR (125 MHz,  $\text{CDCl}_3$ )  $\delta$  206.3, 144.3, 139.4, 139.3, 138.7, 138.6, 137.3, 130.4, 128.9, 128.5, 128.3, 128.2, 128.0, 127.6, 127.3, 126.6, 126.1, 59.0, 55.1, 53.4, 45.6, 41.4, 40.8, 36.5, 21.5; MS (MALDI) calcd. for  $\text{C}_{33}\text{H}_{31}\text{ClN}_2\text{O}_5\text{S}_2\text{Na}$   $[\text{M} + \text{Na}]^+$  657.12, found 657.43.

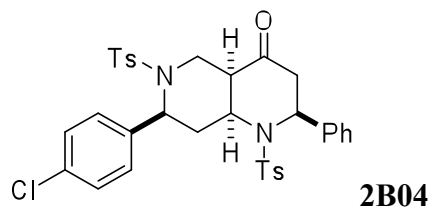

90% yield; white solid; IR (film)  $\nu_{\max}$  3062, 2923, 2864, 1713, 1347, 1162, 660  $\text{cm}^{-1}$ ;  $^1\text{H}$  NMR (500 MHz,  $\text{CDCl}_3$ )  $\delta$  7.73 (d,  $J = 8.0$  Hz, 2H), 7.46 (d,  $J = 8.1$  Hz, 2H), 7.37-7.36 (m, 4H), 7.23-7.14 (m, 5H), 7.03 (d,  $J = 8.4$  Hz, 2H), 6.75 (d,  $J = 8.4$  Hz, 2H), 5.68 (d,  $J = 6.5$  Hz, 1H), 4.82 (dd,  $J = 11.2, 6.9$  Hz, 1H), 4.56-4.52 (m, 1H), 3.79 (dd,  $J = 15.4, 7.9$  Hz, 1H), 3.44 (dd,  $J = 15.3, 9.0$  Hz, 1H), 2.93 (d,  $J = 14.8$  Hz, 1H), 2.64 (dd,  $J = 17.2, 8.6$  Hz, 1H), 2.45 (s, 3H), 2.38 (s, 3H), 2.20 (dd,  $J = 14.8, 7.1$  Hz, 1H), 1.74-1.69 (m, 1H), 0.87 (td,  $J = 12.6, 11.8$  Hz, 1H);  $^{13}\text{C}$  NMR (125 MHz,  $\text{CDCl}_3$ )  $\delta$  206.3, 144.2, 143.5, 139.3, 138.7, 137.3, 136.9, 133.1, 130.3, 129.6, 128.5, 128.3, 128.0, 127.3, 127.2, 127.0, 126.6, 58.0, 55.1, 53.2, 45.3, 41.3, 40.5, 36.4, 21.5, 21.4; MS (MALDI) calcd. for  $\text{C}_{34}\text{H}_{33}\text{ClN}_2\text{O}_5\text{S}_2\text{Na}$   $[\text{M} + \text{Na}]^+$  671.14, found 671.33.

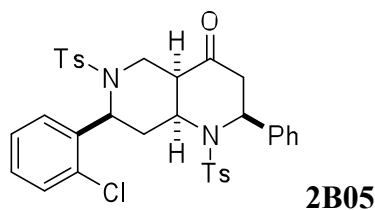

91% yield; white solid; IR (film)  $\nu_{\max}$  3063, 2946, 2923, 1712, 1349, 1162, 660  $\text{cm}^{-1}$ ;  $^1\text{H}$  NMR (500 MHz,  $\text{CDCl}_3$ )  $\delta$  7.69 (d,  $J = 8.3$  Hz, 2H), 7.57 (d,  $J = 8.2$  Hz, 2H), 7.37 (d,  $J = 5.3$  Hz, 2H), 7.30 (d,  $J = 7.8$  Hz, 2H), 7.26-7.24 (m, 2H), 7.19-7.09 (m, 4H), 7.06-6.98 (m, 2H), 6.94 (dd,  $J = 7.6, 1.6$  Hz, 1H), 5.68 (d,  $J = 6.2$  Hz, 1H), 5.10 (dd,  $J = 11.6, 6.3$  Hz, 1H), 4.42-4.38 (m, 1H), 4.06 (dd,  $J = 15.6, 7.9$  Hz, 1H), 3.55 (dd,  $J = 15.6, 9.6$  Hz, 1H), 2.93 (dd,  $J = 14.9, 2.2$  Hz, 1H), 2.69 (dd,  $J = 17.8, 9.1$  Hz, 1H), 2.47 (s, 3H), 2.40 (s, 3H), 2.26 (dd,  $J = 14.6, 7.1$  Hz, 1H), 1.86-1.82 (m, 1H), 0.74 (td,  $J = 12.6, 11.8$  Hz, 1H);  $^{13}\text{C}$  NMR (125 MHz,  $\text{CDCl}_3$ )  $\delta$  206.5, 144.2, 143.6, 139.1, 138.4, 137.3, 136.5, 131.1, 130.2, 129.6, 129.5, 128.5, 128.4, 128.2, 128.0, 127.2, 127.1, 126.9, 126.7, 56.6, 54.9, 53.2, 45.3, 41.6, 41.4, 34.8, 21.5, 21.4; MS (MALDI) calcd. for  $\text{C}_{34}\text{H}_{33}\text{ClN}_2\text{O}_5\text{S}_2\text{Na}$   $[\text{M} + \text{Na}]^+$  671.14, found 671.72.

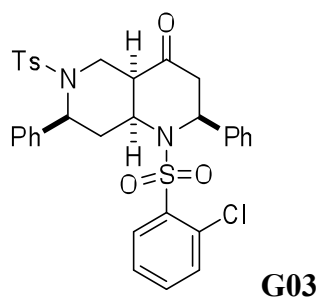

88% yield; white solid; IR (film)  $\nu_{\max}$  3063, 2917, 1713, 1348, 1164, 662  $\text{cm}^{-1}$ ;  $^1\text{H}$  NMR (500 MHz,  $\text{CDCl}_3$ )  $\delta$  8.28 (dd,  $J = 7.8, 1.4$  Hz, 1H), 7.76-7.58 (m, 2H), 7.53-7.50 (m, 1H), 7.40 (d,  $J = 7.7$  Hz, 2H), 7.36 (d,  $J = 8.2$  Hz, 2H), 7.22 (t,  $J = 7.5$  Hz, 2H), 7.18-7.06 (m, 6H), 6.84 (d,  $J = 6.8$  Hz, 2H), 5.72 (d,  $J = 5.4$  Hz, 1H), 4.88 (dd,  $J = 11.4, 6.8$  Hz, 1H), 3.84 (dd,  $J = 15.2, 7.9$  Hz, 1H), 3.45 (dd,  $J = 15.3, 9.2$  Hz, 1H), 3.07 (dd,  $J = 15.0, 2.0$  Hz, 1H), 2.92 (dd,  $J = 17.5, 8.8$  Hz, 1H), 2.76 (dd,  $J = 14.8, 7.0$  Hz, 1H), 2.35 (s, 3H), 1.92-1.88 (m, 1H), 1.04 (td,  $J = 13.5, 11.8$  Hz, 1H);  $^{13}\text{C}$  NMR (125 MHz,  $\text{CDCl}_3$ )  $\delta$  206.8, 143.2, 140.2, 139.3, 136.9, 136.7, 134.2, 132.8, 132.3, 131.2, 129.4, 128.6, 128.2, 128.1, 127.6, 127.5, 127.3, 126.9, 125.9, 58.4, 55.2, 53.1, 46.1,

42.5, 40.8, 36.2, 21.4; MS (MALDI) calcd. for C<sub>33</sub>H<sub>31</sub>ClN<sub>2</sub>O<sub>5</sub>S<sub>2</sub>Na [M + Na]<sup>+</sup> 657.12, found 657.43.

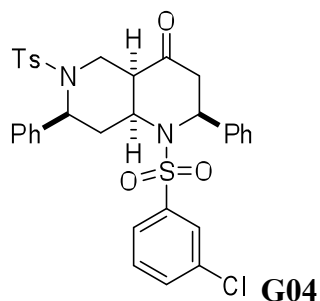

85% yield; white solid; IR (film)  $\nu_{\max}$  3064, 2921, 1713, 1348, 1165, 668 cm<sup>-1</sup>; <sup>1</sup>H NMR (500 MHz, CDCl<sub>3</sub>)  $\delta$  7.92 (t, *J* = 1.8 Hz, 1H), 7.80 (d, *J* = 8.8 Hz, 1H), 7.64-7.62 (m, 1H), 7.55 (t, *J* = 7.9 Hz, 1H), 7.46 (d, *J* = 8.2 Hz, 2H), 7.37 (d, *J* = 7.9 Hz, 2H), 7.23 (t, *J* = 7.5 Hz, 2H), 7.19-7.16 (m, 3H), 7.13-7.08 (m, 3H), 6.85-6.83 (m, 2H), 5.72 (d, *J* = 6.5 Hz, 1H), 4.93 (dd, *J* = 11.1, 7.1 Hz, 1H), 4.59 (t, *J* = 10.4 Hz, 1H), 3.80 (dd, *J* = 15.4, 8.1 Hz, 1H), 3.45 (dd, *J* = 15.5, 9.1 Hz, 1H), 3.01 (dd, *J* = 14.9, 2.0 Hz, 1H), 2.74 (dd, *J* = 17.5, 8.7 Hz, 1H), 2.36 (s, 3H), 2.31 (dd, *J* = 14.9, 7.1 Hz, 1H), 1.80-1.75 (m, 1H), 0.99 (td, *J* = 13.5, 11.7 Hz, 1H); <sup>13</sup>C NMR (125 MHz, CDCl<sub>3</sub>)  $\delta$  206.0, 143.4, 142.0, 140.0, 139.0, 136.8, 135.9, 133.4, 131.0, 129.5, 128.6, 128.2, 128.1, 127.4, 127.3, 127.1, 126.6, 125.8, 124.8, 58.2, 55.4, 53.4, 45.6, 41.7, 40.4, 36.1, 21.4; MS (MALDI) calcd. for C<sub>33</sub>H<sub>31</sub>ClN<sub>2</sub>O<sub>5</sub>S<sub>2</sub>Na [M + Na]<sup>+</sup> 657.12, found 657.38.

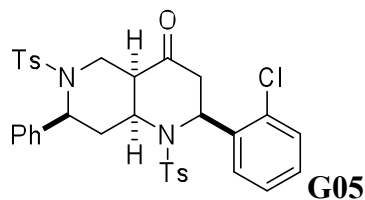

80% yield; white solid; IR (film)  $\nu_{\max}$  3063, 2923, 1725, 1351, 1165, 658 cm<sup>-1</sup>; <sup>1</sup>H NMR (500 MHz, CDCl<sub>3</sub>)  $\delta$  7.73 (d, *J* = 8.3 Hz, 2H), 7.41-7.31 (m, 6H), 7.21-7.12 (m, 7H), 7.00 (d, *J* = 7.1 Hz, 2H), 5.54 (dd, *J* = 10.1, 5.7 Hz, 1H), 4.71 (dd, *J* = 11.2, 5.6 Hz, 1H), 4.51-4.46 (m, 1H), 3.85 (dd, *J* = 14.2, 7.2 Hz, 1H), 3.54 (dd, *J* = 14.1, 6.6 Hz, 1H), 2.88 (dd, *J* = 16.8, 5.7 Hz, 1H), 2.65 (dd, *J* = 16.8, 10.2 Hz, 1H), 2.53 (dd, *J* = 14.4, 7.1 Hz, 1H), 2.46 (s, 3H), 2.42-2.38 (m, 4H), 1.86 (td, *J* = 13.3, 11.4 Hz, 1H); <sup>13</sup>C NMR (125 MHz, CDCl<sub>3</sub>)  $\delta$  205.1, 144.5, 143.3, 139.64, 139.62, 136.7, 131.7, 130.1, 129.9, 129.3, 128.8, 128.2, 127.6, 127.5, 127.4, 127.3, 127.2, 126.8, 60.0,

54.6, 53.1, 45.5, 43.8, 43.2, 39.5, 21.5, 21.4; MS (MALDI) calcd. for C<sub>34</sub>H<sub>33</sub>ClN<sub>2</sub>O<sub>5</sub>S<sub>2</sub>Na [M + Na]<sup>+</sup> 671.14, found 671.53.

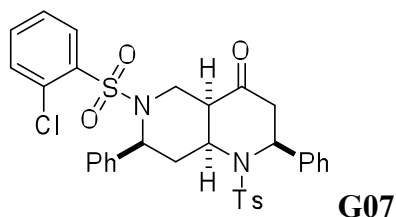

87% yield; white solid; IR (film)  $\nu_{\max}$  3063, 2921, 1714, 1336, 1163, 661 cm<sup>-1</sup>; <sup>1</sup>H NMR (500 MHz, CDCl<sub>3</sub>)  $\delta$  7.90 (d,  $J$  = 8.2 Hz, 2H), 7.73 (d,  $J$  = 7.5 Hz, 1H), 7.42-7.40 (m, 4H), 7.28-7.22 (m, 4H), 7.17-7.11 (m, 2H), 6.99-6.92 (m, 3H), 6.73 (d,  $J$  = 6.9 Hz, 2H), 5.80 (d,  $J$  = 6.5 Hz, 1H), 4.84 (dd,  $J$  = 11.1, 6.9 Hz, 1H), 4.80-4.75 (m, 1H), 4.17 (dd,  $J$  = 15.3, 8.0 Hz, 1H), 3.68 (dd,  $J$  = 15.4, 9.1 Hz, 1H), 3.02 (dd,  $J$  = 14.9, 2.1 Hz, 1H), 2.69 (dd,  $J$  = 17.4, 8.8 Hz, 1H), 2.48 (s, 3H), 2.38 (dd,  $J$  = 14.7, 7.1 Hz, 1H), 1.80-1.75 (m, 4H), 1.05 (td,  $J$  = 13.5, 11.6 Hz, 1H); <sup>13</sup>C NMR (125 MHz, CDCl<sub>3</sub>)  $\delta$  206.2, 144.2, 139.6, 139.0, 137.6, 137.3, 133.2, 131.8, 131.4, 130.4, 128.5, 128.0, 127.9, 127.4, 127.3, 126.7, 126.6, 125.6, 59.0, 55.3, 53.3, 46.2, 41.6, 36.3, 21.5; MS (MALDI) calcd. for C<sub>33</sub>H<sub>31</sub>ClN<sub>2</sub>O<sub>5</sub>S<sub>2</sub>Na [M + Na]<sup>+</sup> 657.12, found 657.62.

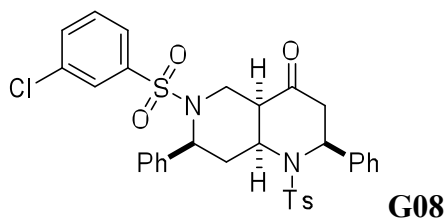

84% yield; white solid; IR (film)  $\nu_{\max}$  3063, 2917, 1713, 1349, 1163, 660 cm<sup>-1</sup>; <sup>1</sup>H NMR (500 MHz, CDCl<sub>3</sub>)  $\delta$  7.84 (d,  $J$  = 8.2 Hz, 2H), 7.42-7.39 (m, 5H), 7.34 (d,  $J$  = 7.9 Hz, 1H), 7.30 (s, 1H), 7.24-7.21 (m, 3H), 7.17-7.11 (m, 2H), 7.06 (t,  $J$  = 7.5 Hz, 2H), 6.78 (d,  $J$  = 7.4 Hz, 2H), 5.77 (d,  $J$  = 6.5 Hz, 1H), 4.84 (dd,  $J$  = 11.4, 6.7 Hz, 1H), 4.65 (t,  $J$  = 10.1 Hz, 1H), 3.81 (dd,  $J$  = 15.0, 7.8 Hz, 1H), 3.56 (dd,  $J$  = 15.0, 8.9 Hz, 1H), 3.01 (dd,  $J$  = 14.9, 1.7 Hz, 1H), 2.74 (dd,  $J$  = 17.1, 8.5 Hz, 1H), 2.49 (s, 3H), 2.34 (dd,  $J$  = 15.3, 6.5 Hz, 1H), 1.75-1.71 (m, 1H), 1.03 (td,  $J$  = 13.5, 11.9 Hz, 1H); <sup>13</sup>C NMR (125 MHz, CDCl<sub>3</sub>)  $\delta$  206.3, 144.3, 141.8, 139.4, 139.0, 137.3, 134.8, 132.3, 130.4, 130.0, 128.5, 128.2, 128.0, 127.9, 127.3, 126.9, 126.7, 126.2, 124.8, 59.2,

55.2, 53.4, 45.8, 41.5, 40.9, 36.4, 21.5; MS (MALDI) calcd. for C<sub>33</sub>H<sub>31</sub>ClN<sub>2</sub>O<sub>5</sub>S<sub>2</sub>Na [M + Na]<sup>+</sup> 657.12, found 657.48.

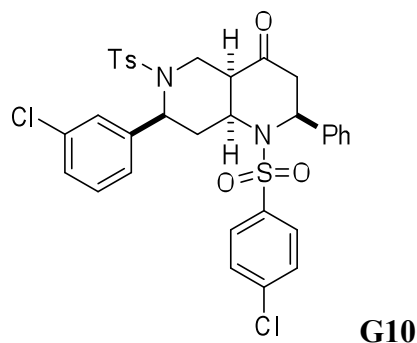

83% yield; white solid; IR (film)  $\nu_{\max}$  3060, 2918, 1717, 1349, 1164, 661 cm<sup>-1</sup>; <sup>1</sup>H NMR (500 MHz, CDCl<sub>3</sub>)  $\delta$  7.87 (d, *J* = 8.4 Hz, 2H), 7.87 (d, *J* = 8.4 Hz, 2H), 7.58 (d, *J* = 8.4 Hz, 2H), 7.47 (d, *J* = 8.1 Hz, 2H), 7.38 (d, *J* = 7.6 Hz, 2H), 7.27-7.24 (m, 2H), 7.21-7.19 (m, 3H), 7.08-7.02 (m, 2H), 6.74 (d, *J* = 7.4 Hz, 1H), 6.63 (s, 1H), 5.75 (d, *J* = 6.6 Hz, 1H), 4.85 (dd, *J* = 11.2, 7.0 Hz, 1H), 4.59 (t, *J* = 10.2 Hz, 1H), 3.77 (dd, *J* = 15.4, 7.9 Hz, 1H), 3.43 (dd, *J* = 15.4, 8.9 Hz, 1H), 3.02 (dd, *J* = 14.9, 1.5 Hz, 1H), 2.71 (dd, *J* = 17.2, 8.6 Hz, 1H), 2.39 (s, 3H), 2.32 (dd, *J* = 14.8, 7.1 Hz, 1H), 1.76-1.71 (m, 1H), 0.89 (td, *J* = 13.4, 11.5 Hz, 1H); <sup>13</sup>C NMR (125 MHz, CDCl<sub>3</sub>)  $\delta$  205.8, 143.7, 141.8, 139.8, 139.1, 138.8, 136.6, 134.1, 130.0, 129.5, 128.6, 128.2, 128.1, 127.5, 127.3, 127.1, 125.9, 124.2, 57.7, 55.3, 53.3, 45.5, 41.6, 40.5, 36.0, 21.4; MS (MALDI) calcd. for C<sub>33</sub>H<sub>30</sub>Cl<sub>2</sub>N<sub>2</sub>O<sub>5</sub>S<sub>2</sub>Na [M + Na]<sup>+</sup> 691.09, found 691.46.

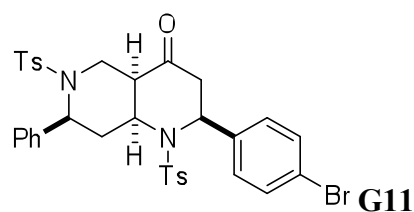

85% yield; white solid; IR (film)  $\nu_{\max}$  3060, 2921, 1714, 1347, 1163, 660 cm<sup>-1</sup>; <sup>1</sup>H NMR (500 MHz, CDCl<sub>3</sub>)  $\delta$  7.77 (d, *J* = 8.2 Hz, 2H), 7.44 (d, *J* = 8.2 Hz, 2H), 7.40-7.34 (m, 4H), 7.27 (d, *J* = 7.4 Hz, 2H), 7.18-7.11 (m, 5H), 6.86-6.85 (m, 2H), 5.64 (d, *J* = 6.6 Hz, 1H), 4.95 (dd, *J* = 11.1, 7.0 Hz, 1H), 4.64 (t, *J* = 10.3 Hz, 1H), 3.76 (dd, *J* = 15.4, 8.0 Hz, 1H), 3.46 (dd, *J* = 15.4, 9.1 Hz, 1H), 2.89 (dd, *J* = 14.7, 1.9 Hz, 1H), 2.69 (dd, *J* = 17.4, 8.6 Hz, 1H), 2.49 (s, 3H), 2.38 (s, 3H), 2.32 (dd, *J* = 14.7, 7.1 Hz, 1H), 1.83-1.79 (m, 1H), 0.99 (td, *J* = 13.5, 11.6 Hz, 1H); <sup>13</sup>C NMR

(125 MHz, CDCl<sub>3</sub>)  $\delta$  206.2, 144.3, 143.3, 139.9, 138.5, 137.1, 137.0, 131.6, 130.3, 129.4, 129.0, 128.3, 127.4, 127.1, 126.6, 125.8, 122.2, 58.4, 54.9, 53.5, 45.6, 41.3, 40.3, 36.5, 21.5, 21.4; MS (MALDI) calcd. for C<sub>34</sub>H<sub>34</sub>BrN<sub>2</sub>O<sub>5</sub>S<sub>2</sub>Na [M + Na]<sup>+</sup> 695.11, found 695.44.

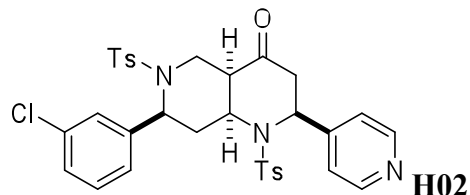

87% yield; white solid; IR (film)  $\nu_{\max}$  3061, 2923, 1715, 1349, 1162, 660 cm<sup>-1</sup>; <sup>1</sup>H NMR (500 MHz, CDCl<sub>3</sub>)  $\delta$  8.48 (d, *J* = 5.6 Hz, 2H), 7.77 (d, *J* = 8.2 Hz, 2H), 7.45-7.31 (m, 6H), 7.19-7.14 (m, 2H), 7.06-7.00 (m, 2H), 6.71-6.67 (m, 2H), 5.63 (d, *J* = 6.2 Hz, 1H), 4.87 (dd, *J* = 11.0, 6.9 Hz, 1H), 4.62 (t, *J* = 10.2 Hz, 1H), 3.77 (dd, *J* = 15.3, 7.9 Hz, 1H), 3.47 (dd, *J* = 15.3, 8.8 Hz, 1H), 2.91 (dd, *J* = 14.7, 2.0 Hz, 1H), 2.68 (dd, *J* = 16.9, 8.5 Hz, 1H), 2.46 (s, 3H), 2.36 (s, 3H), 2.29-2.24 (m, 1H), 1.84-1.81 (m, 1H), 0.87 (td, *J* = 13.3, 12.4 Hz, 1H); <sup>13</sup>C NMR (125 MHz, CDCl<sub>3</sub>)  $\delta$  205.3, 150.2, 148.5, 143.7, 141.7, 136.7, 136.6, 134.2, 130.5, 129.7, 129.6, 127.6, 127.0, 126.6, 125.8, 123.8, 122.1, 58.0, 54.7, 53.8, 45.5, 40.7, 40.4, 36.8, 21.6, 21.4; MS (MALDI) calcd. for C<sub>33</sub>H<sub>32</sub>ClN<sub>3</sub>O<sub>5</sub>S<sub>2</sub>Na [M + Na]<sup>+</sup> 672.14, found 673.50.

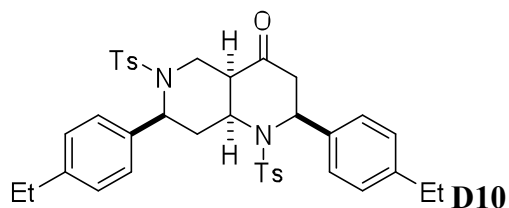

88% yield; white solid; IR (film)  $\nu_{\max}$  2965, 2930, 1713, 1347, 1162, 660 cm<sup>-1</sup>; <sup>1</sup>H NMR (500 MHz, CDCl<sub>3</sub>)  $\delta$  7.76 (d, *J* = 8.3 Hz, 2H), 7.42 (d, *J* = 8.3 Hz, 2H), 7.37 (d, *J* = 8.0 Hz, 2H), 7.27 (d, *J* = 8.0 Hz, 2H), 7.16 (d, *J* = 8.0 Hz, 2H), 7.05 (d, *J* = 8.2 Hz, 2H), 6.89 (d, *J* = 8.1 Hz, 2H), 6.73 (d, *J* = 8.1 Hz, 2H), 5.69 (d, *J* = 6.5 Hz, 1H), 4.85 (dd, *J* = 11.3, 6.9 Hz, 1H), 4.56 (t, *J* = 10.5 Hz, 1H), 3.78 (dd, *J* = 15.3, 8.0 Hz, 1H), 3.41 (dd, *J* = 15.3, 9.2 Hz, 1H), 2.93 (dd, *J* = 14.9, 2.0 Hz, 1H), 2.668 (dd, *J* = 17.5, 8.9 Hz, 1H), 2.55-2.50 (m, 4H), 2.48 (s, 3H), 2.37 (s, 3H), 2.23 (dd, *J* = 14.8, 7.1 Hz, 1H), 1.74-1.69 (m, 1H), 1.15 (t, *J* = 7.0 Hz, 3H), 1.07 (t, *J* = 7.0 Hz, 1H), 0.94 (td, *J* = 13.6, 11.6 Hz, 1H); <sup>13</sup>C NMR (125 MHz, CDCl<sub>3</sub>)  $\delta$  206.7, 144.3, 144.1, 143.4,

143.0, 137.5, 137.3, 137.2, 136.6, 130.2, 129.4, 128.0, 127.5, 127.4, 127.0, 126.6, 126.0, 58.3, 54.9, 53.1, 45.4, 41.5, 40.5, 36.3, 28.3, 21.5, 21.4, 15.5, 15.4; MS (MALDI) calcd. for  $C_{38}H_{42}N_2O_5S_2Na$   $[M + Na]^+$  693.24, found 693.77.

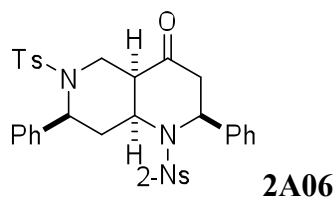

81% yield; white solid; IR (film)  $\nu_{max}$  3064, 2921, 1714, 1544, 1373, 1165, 699  $cm^{-1}$ ;  $^1H$  NMR (500 MHz,  $CDCl_3$ )  $\delta$  8.30-8.28 (m, 1H), 7.84-7.79 (m, 2H), 7.77-7.74 (m, 1H), 7.41-7.37 (m, 4H), 7.24 (t,  $J = 7.5$  Hz, 2H), 7.18 (t,  $J = 7.2$  Hz, 1H), 7.13-7.07 (m, 5H), 6.81 (d,  $J = 7.1$  Hz, 2H), 5.86 (d,  $J = 6.4$  Hz, 1H), 4.99 (dd,  $J = 11.1, 7.1$  Hz, 1H), 4.60 (t,  $J = 10.3$  Hz, 1H), 3.79 (dd,  $J = 15.3, 8.1$  Hz, 1H), 3.46 (dd,  $J = 15.4, 9.1$  Hz, 1H), 3.18 (dd,  $J = 15.1, 2.0$  Hz, 1H), 3.03 (dd,  $J = 15.1, 7.1$  Hz, 1H), 2.93 (dd,  $J = 17.4, 8.7$  Hz, 1H), 2.38 (s, 3H), 1.95-1.91 (m, 1H), 1.03 (td,  $J = 13.2, 11.3$  Hz, 1H);  $^{13}C$  NMR (125 MHz,  $CDCl_3$ )  $\delta$  206.8, 147.6, 143.4, 140.0, 139.3, 136.5, 134.2, 132.9, 132.5, 131.8, 129.4, 128.6, 128.2, 128.1, 127.4, 127.3, 127.1, 125.8, 124.5, 58.1, 55.9, 53.5, 46.2, 42.6, 40.6, 35.5, 21.4; MS (MALDI) calcd. for  $C_{33}H_{31}N_3O_7S_2Na$   $[M + Na]^+$  668.15, found 668.42.

### Procedure for the synthesis of naphthyridine enol ether **15'**

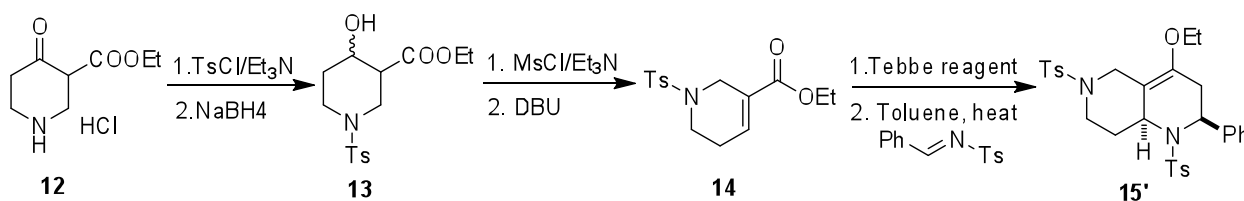

To a solution of ethyl 4-piperidone-3-carboxylate hydrochloride (2.0g, 9.6 mmol) in DCM (40 mL) was added dropwise at 0 °C  $Et_3N$  (5.3 mL, 4.0 eq.). After 30 mins, a solution of  $TsCl$  in DCM (20 mL) was added dropwise to the mixture. After stirring over night at room temperature, the reaction mixture was washed by 2 N  $HCl$  (3 X 30 mL), saturated  $NaHCO_3$  (2 X 30 mL), and brine (2 X 30 mL). The organic phase was dried over anhydrous  $Na_2SO_4$  and concentrated. The crude residue was used for the next step without any purification. To a stirred solution of the

crude residue (~9.6 mmol) in absolute ethanol (15 ml) was added dropwise at 0 °C a solution of NaBH<sub>4</sub> (363 mg, 9.6 mmol) in absolute ethanol (15 mL). Stirring was continued for an additional 13 h, during which the reaction temperature rose slowly to room temperature. A few drops of aqueous acetic acids followed by water were added to the reaction mixture which was then extracted with DCM (3 X 30 mL). The organic phase was dried over anhydrous Na<sub>2</sub>SO<sub>4</sub> and concentrated. The crude residue was purified by flash column chromatography on the silica gel using 33% ethyl acetate in hexanes to afford the product alcohol in 54% yield, two steps. To a stirred solution of the alcohol (1.7 g, 5.2 mmol) and Et<sub>3</sub>N (2.2 mL, 3.0 eq.) in ether (12 mL) was added dropwise at 0 °C methanesulfonyl chloride (0.8 mL). The reaction was stirred for 3 h after which a solution of DBU (1.5 mL) in ether (6 mL) was added to it. Stirring was continued for an additional 4 h after which the reaction mixture was quenched by the addition of water, and then extracted with ether (3 X 30 mL). The organic phase was dried over anhydrous Na<sub>2</sub>SO<sub>4</sub> and concentrated. The crude residue was purified by flash column chromatography on the silica gel using 20% ethyl acetate in hexanes to afford the product  $\alpha,\beta$ -unsaturated ester in 70% yield, two steps.<sup>6</sup> Naphthyridine enol ether (**15'**) was synthesized following the same procedure of naphthyridine enol ethers (**11'**) synthesis from the  $\alpha,\beta$ -unsaturated ester as white solid in 53% yield, two steps. IR (film)  $\nu_{\text{max}}$  3060, 2978, 2921, 1699, 1343, 1165, 655 cm<sup>-1</sup>; <sup>1</sup>H NMR (500 MHz, CDCl<sub>3</sub>)  $\delta$  7.67 (d, *J* = 7.9 Hz, 2H), 7.60 (d, *J* = 8.2 Hz, 2H), 7.42 (d, *J* = 7.6 Hz, 2H), 7.34-7.26 (m, 7H), 5.31 (d, *J* = 6.6 Hz, 1H), 4.86 (dd, *J* = 12.1, 2.0 Hz, 1H), 4.02 (d, *J* = 11.8 Hz, 1H), 3.82 (dq, *J* = 9.5, 7.1 Hz, 1H), 3.74 (dq, *J* = 9.5, 7.1 Hz, 1H), 3.53 (d, *J* = 12.0 Hz, 1H), 2.60 (d, *J* = 17.1 Hz, 1H), 2.47-2.44 (m, 4H), 2.41 (s, 3H), 2.23 (td, *J* = 12.2, 2.3 Hz, 1H), 2.09-2.04 (m, 1H), 1.67-1.63 (m, 1H), 1.19 (t, *J* = 7.1 Hz, 3H), 0.96 (ddd, *J* = 24.8, 12.4, 4.4 Hz, 1H); <sup>13</sup>C NMR (125 MHz, CDCl<sub>3</sub>)  $\delta$  144.1, 143.5, 139.6, 137.5, 132.8, 129.8, 129.5, 128.4, 127.7, 127.6, 126.5, 110.0, 63.9, 53.9, 52.4, 46.1, 44.6, 32.7, 24.6, 21.5, 21.4, 15.0; MS (MALDI) calcd. for C<sub>30</sub>H<sub>34</sub>N<sub>2</sub>O<sub>5</sub>S<sub>2</sub>Na [M + Na]<sup>+</sup> 589.18, found 589.60.

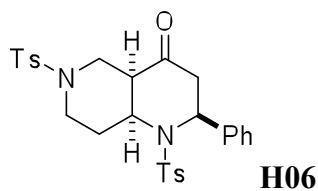

<sup>6</sup> Kosugi, H., Yamabe, O. & Kato, M. Synthetic study of marine lobane diterpenes: efficient synthesis of (+)-fuscol. *J. Chem. Soc. Perkin Trans.* 217-221 (1998).



Naphthyridinone (**H06**) was synthesized following the same procedure of naphthyridinone (**11**) synthesis from naphthyridine enol ether (**15'**) in 87% yield; white solid; IR (film)  $\nu_{\max}$  3059, 2922, 2843, 1725, 1338, 1165, 656  $\text{cm}^{-1}$ ;  $^1\text{H}$  NMR (500 MHz,  $\text{CDCl}_3$ )  $\delta$  7.73 (d,  $J = 8.3$  Hz, 2H), 7.58 (d,  $J = 8.2$  Hz, 2H), 7.39 (d,  $J = 7.5$  Hz, 2H), 7.32-7.29 (m, 6H), 7.27-7.26 (m, 1H), 5.61 (dd,  $J = 7.1, 3.9$  Hz, 1H), 4.37-4.33 (m, 1H), 4.27 (d,  $J = 12.0$  Hz, 1H), 3.53-3.51 (m, 1H), 3.01 (dd,  $J = 15.5, 4.0$  Hz, 1H), 2.51 (dd,  $J = 15.5, 7.4$  Hz, 1H), 2.43 (s, 6H), 2.29-2.26 (m, 1H), 2.13-2.08 (m, 2H), 1.49-1.47 (m, 1H), 1.32-1.24 (m, 1H);  $^{13}\text{C}$  NMR (125 MHz,  $\text{CDCl}_3$ )  $\delta$  202.7, 144.2, 143.6, 140.7, 137.0, 132.8, 130.2, 129.5, 128.6, 127.7, 127.6, 126.9, 126.7, 56.2, 55.6, 46.4, 45.7, 43.5, 42.2, 31.0, 21.5, 21.4; MS (MALDI) calcd. for  $\text{C}_{28}\text{H}_{30}\text{N}_2\text{O}_5\text{S}_2\text{Na}$  [ $\text{M} + \text{Na}$ ] $^+$  561.15, found 561.77.

### Synthesis of compounds **2B06** and **2B07**

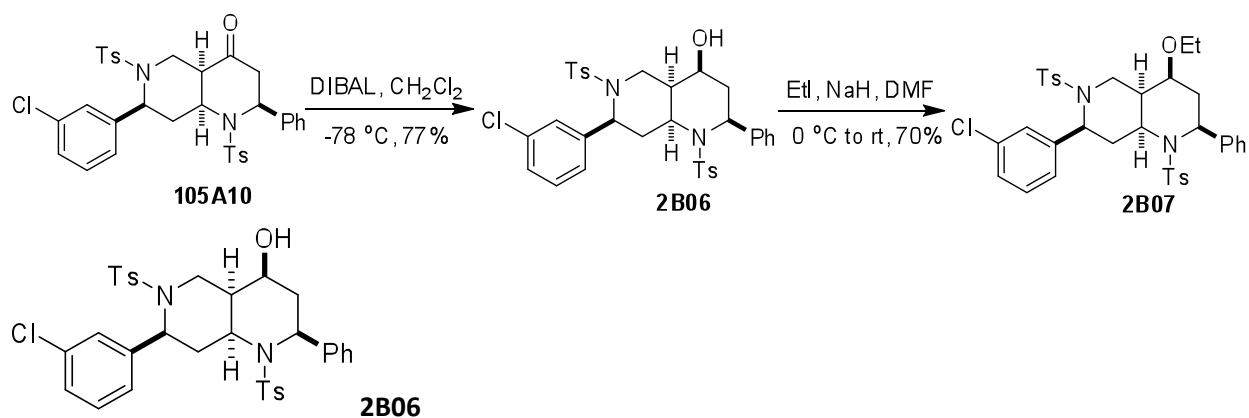

To a solution of naphthyridinone (**105A10**, 0.22 mmol) in  $\text{CH}_2\text{Cl}_2$  (6 mL) at  $-78$  °C, 0.55 mL diisobutylaluminium hydride (DIBAL, 1.0 M in  $\text{CH}_2\text{Cl}_2$ ) was added dropwise. The reaction was finished in an hour. Water (0.03 mL) was added at  $-78$  °C and the reaction was warmed up to room temperature. Anhydrous  $\text{Na}_2\text{SO}_4$  (0.1 g) was added. The reaction mixture was filtered through the Celite pad and the filtrate was concentrated. The crude residue was purified by flash column chromatography on the silica gel using 33% ethyl acetate in hexanes to afford the product (**2B06**) as a white solid in 77% yield; IR (film)  $\nu_{\max}$  3516, 3061, 2954, 2925, 1598, 1344, 1161, 667  $\text{cm}^{-1}$ ;  $^1\text{H}$  NMR (500 MHz,  $\text{CDCl}_3$ )  $\delta$  7.63 (d,  $J = 8.2$  Hz, 2H), 7.43 (d,  $J = 8.3$  Hz, 2H), 7.36 (d,  $J = 7.8$  Hz, 2H), 7.31-7.24 (m, 4H), 7.19-7.16 (m, 3H), 7.13-7.10 (m, 2H), 7.00-6.97 (m, 1H), 6.88 (s, 1H), 5.07 (t,  $J = 7.9$  Hz, 1H), 4.83 (dd,  $J = 11.9, 6.0$  Hz, 1H), 4.29-4.24 (m, 1H),

3.83 (dd,  $J = 14.7, 6.7$  Hz, 1H), 3.47 (dd,  $J = 14.8, 10.8$  Hz, 1H), 3.43-3.39 (m, 1H), 2.46 (s, 3H), 2.40 (s, 3H), 2.33-2.24 (m, 2H), 2.17-2.10 (m, 1H), 2.00-1.90 (m, 2H), 1.67 (d,  $J = 3.6$  Hz, 1H);  $^{13}\text{C}$  NMR (125 MHz,  $\text{CDCl}_3$ )  $\delta$  143.8, 143.5, 143.2, 142.5, 137.0, 136.6, 134.2, 129.9, 129.7, 129.5, 128.3, 127.5, 126.9, 126.8, 126.7, 126.0, 125.6, 124.3, 65.6, 58.6, 56.0, 50.8, 41.6, 38.8, 35.8, 33.3, 21.5, 21.4; MS (MALDI) calcd. for  $\text{C}_{34}\text{H}_{35}\text{ClN}_2\text{O}_5\text{S}_2\text{Na}$   $[\text{M} + \text{Na}]^+$  673.16, found 673.79.

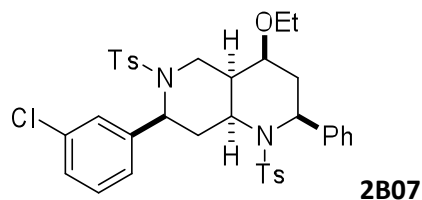

To a solution of **2B06** (0.16 mmol) and NaH (60% in mineral oil, 0.24 mmol) in anhydrous DMF (2.5 mL), ethyl iodide (0.24 mmol) was added dropwise at 0 °C and the reaction was warmed up to room temperature. The mixture was stirred at 50 °C for 5 hours. The saturated NaCl (2.0 mL) was added and the mixture was extracted by ethyl acetate (3 X 10 mL). The organic phase was dried over anhydrous  $\text{Na}_2\text{SO}_4$  and concentrated. The crude residue was purified by flash column chromatography on the silica gel using 20% ethyl acetate in hexanes to afford final product **2B07** as yellow oil in 70% yield; IR (film)  $\nu_{\text{max}}$  3061, 2971, 1598, 1345, 1161, 665  $\text{cm}^{-1}$ ;  $^1\text{H}$  NMR (500 MHz,  $\text{CDCl}_3$ )  $\delta$  7.62 (d,  $J = 8.2$  Hz, 2H), 7.46 (d,  $J = 8.3$  Hz, 2H), 7.34-7.30 (m, 4H), 7.27-7.24 (m, 2H), 7.21-7.15 (m, 3H), 7.00-6.97 (m, 1H), 7.12-7.10 (m, 2H), 7.01-6.98 (m, 1H), 6.93 (s, 1H), 5.01-4.93 (m, 2H), 4.32-4.27 (m, 1H), 3.81 (dd,  $J = 15.0, 7.0$  Hz, 1H), 3.30 (dd,  $J = 15.0, 11.8$  Hz, 1H), 3.19-3.05 (m, 2H), 2.64-2.60 (m, 1H), 2.47 (s, 3H), 2.44-2.40 (m, 4H), 2.29-2.25 (m, 1H), 2.11-2.04 (m, 1H), 1.94-1.83 (m, 2H), 0.96 (t,  $J = 7.0$  Hz, 3H);  $^{13}\text{C}$  NMR (125 MHz,  $\text{CDCl}_3$ )  $\delta$  143.7, 143.4, 143.3, 142.5, 137.5, 136.8, 134.2, 129.8, 129.7, 129.4, 128.2, 127.4, 126.8, 125.8, 125.4, 124.2, 72.3, 64.2, 58.0, 56.6, 50.7, 40.5, 38.4, 34.6, 30.4, 21.5, 21.4, 14.8; MS (MALDI) calcd. for  $\text{C}_{36}\text{H}_{39}\text{ClN}_2\text{O}_5\text{S}_2\text{Na}$   $[\text{M} + \text{Na}]^+$  701.19, found 701.75.

### Synthesis of compound G09

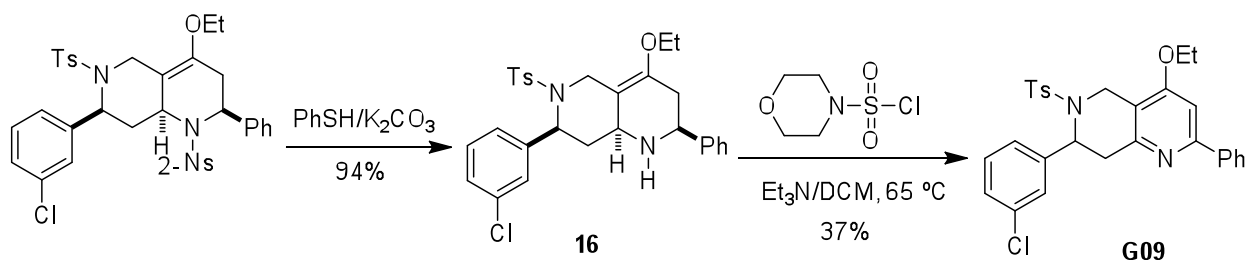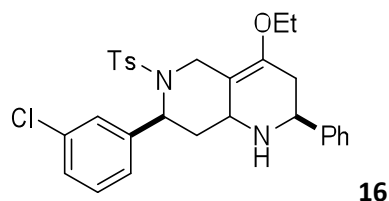

To a mixture of naphthyridine enol ether (0.10 mmol) and  $K_2CO_3$  (0.30 mmol) in anhydrous  $CH_3CN$  (2.5 mL), PhSH (0.12 mmol) was added dropwise at room temperature. The mixture was stirred at 50 °C for 8 hours. The saturated NaCl (2.0 mL) was added and the mixture was extracted by ethyl acetate (3 X 10 mL). The organic phase was dried over anhydrous  $Na_2SO_4$  and concentrated. The crude residue was purified by flash column chromatography on the silica gel using 1% triethylamine and 80% ethyl acetate in hexanes to afford final product **16** as white solid in 94% yield; IR (film)  $\nu_{max}$  3400, 3062, 2977, 1597, 1346, 1161, 701  $cm^{-1}$ ;  $^1H$  NMR (500 MHz,  $CDCl_3$ )  $\delta$  7.62 (d,  $J = 8.3$  Hz, 2H), 7.34-7.16 (m, 11H), 4.86 (dd,  $J = 10.8, 6.9$  Hz, 1H), 4.71 (d,  $J = 17.2$  Hz, 1H), 4.14 (dt,  $J = 17.2, 1.4$  Hz, 1H), 3.84-3.71 (m, 2H), 3.56 (dd,  $J = 10.5, 4.4$  Hz, 1H), 2.91 (d,  $J = 11.3$  Hz, 1H), 2.43 (s, 3H), 2.30 (d,  $J = 14.8$  Hz, 1H), 2.25-2.14 (m, 2H), 1.70 (td,  $J = 12.1, 11.5$  Hz, 1H), 1.57 (br, 1H), 1.26 (t,  $J = 7.0$  Hz, 3H);  $^{13}C$  NMR (125 MHz,  $CDCl_3$ )  $\delta$  145.4, 144.2, 143.3, 143.2, 136.6, 134.1, 129.6, 129.3, 128.6, 127.5, 127.3, 127.2, 126.3, 126.2, 124.4, 111.7, 62.8, 58.3, 56.9, 51.9, 41.4, 37.6, 34.0, 21.4, 15.5; MS (MALDI) calcd. for  $C_{29}H_{31}ClN_2O_3SNa$   $[M + Na]^+$  545.16, found 545.79.

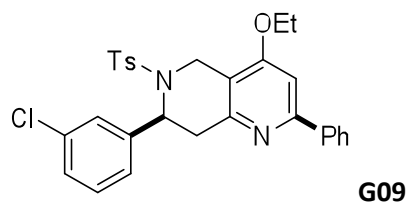

To a solution of **16** (0.10 mmol) and triethylamine (0.30 mmol) in anhydrous  $CH_2Cl_2$  (2.5 mL), the sulfonyl chloride (0.12 mmol) was added dropwise at room temperature. The mixture was stirred at 65 °C for 12 hours. The saturated NaCl (2.0 mL) was added and the mixture was

extracted by ethyl acetate (3 X 10 mL). The organic phase was dried over anhydrous Na<sub>2</sub>SO<sub>4</sub> and concentrated. The crude residue was purified by flash column chromatography on the silica gel using 50% ethyl acetate in hexanes to afford final product **G9** as white solid in 37% yield; IR (film)  $\nu_{\text{max}}$  3061, 2982, 2932, 1589, 1346, 1160, 663 cm<sup>-1</sup>; <sup>1</sup>H NMR (500 MHz, CDCl<sub>3</sub>)  $\delta$  7.90-7.88 (m, 2H), 7.71 (d,  $J$  = 8.3 Hz, 2H), 7.46-7.43 (m, 2H), 7.41-7.37 (m, 1H), 7.26 (s, 1H), 7.21 (d,  $J$  = 8.0 Hz, 2H), 7.18-7.12 (m, 3H), 6.96 (s, 1H), 5.53 (d,  $J$  = 5.9 Hz, 1H), 4.93 (d,  $J$  = 18.0 Hz, 1H), 4.16-4.07 (m, 2H), 3.94 (d,  $J$  = 18.0 Hz, 1H), 3.34 (dd,  $J$  = 17.2, 0.7 Hz, 1H), 3.14 (dd,  $J$  = 17.3, 6.5 Hz, 1H), 2.35 (s, 3H), 1.44 (t,  $J$  = 7.0 Hz, 3H); <sup>13</sup>C NMR (125 MHz, CDCl<sub>3</sub>)  $\delta$  161.6, 157.8, 152.5, 143.5, 140.6, 139.5, 137.3, 134.4, 129.7, 128.9, 128.6, 127.7, 127.6, 126.8, 126.7, 125.3, 114.6, 101.6, 63.8, 53.7, 38.5, 33.4, 21.4, 14.4; MS (MALDI) calcd. for C<sub>29</sub>H<sub>27</sub>ClN<sub>2</sub>O<sub>3</sub>SNa [M + Na]<sup>+</sup> 541.13, found 542.64.
